# Supplementary material
Source: PubMed Central journal article supplement (PMC3580115)
Supplement: NIHMS425283-supplement-3_si_003.pdf [file NIHMS425283-supplement-3_si_003.pdf]

# Supporting Information

## Cytotoxic Alkaloids from the Whole Plants of *Zephyranthes candida*

Zengwei Luo,<sup>†,||</sup> Fuqian Wang,<sup>†,||</sup> Jinwen Zhang,<sup>‡</sup> Xingyao Li,<sup>§</sup> Mengke Zhang,<sup>†</sup> Xincai Hao,<sup>†</sup> Yongbo Xue,<sup>†</sup> Yan Li,<sup>§</sup> F. David Horgen,<sup>⊥</sup> Guangmin Yao,<sup>†,\*</sup> Yonghui Zhang<sup>†,\*</sup>

<sup>†</sup>Hubei Key Laboratory of Natural Medicinal Chemistry and Resource Evaluation, School of Pharmacy, Tongji Medical College, Huazhong University of Science and Technology, Wuhan 430030, People's Republic of China

<sup>‡</sup>Tongji Hospital Affiliated to Tongji Medical College, Huazhong University of Science and Technology, Wuhan 430030, People's Republic of China

<sup>§</sup>State Key Laboratory of Phytochemistry and Plant Resources in West China, Kunming Institute of Botany, Chinese Academy of Science, Kunming 650204, People's Republic of China

<sup>⊥</sup>Laboratory of Marine Biological Chemistry, Department of Natural Sciences, Hawaii Pacific University, Kaneohe, HI 96744, U.S.A.

### List of Supporting Information

**Figure S1.** (+)-HR-ESI-MS spectrum of **1**

**Figure S2.** <sup>1</sup>H NMR spectrum of **1** in CD<sub>3</sub>OD

**Figure S3.** <sup>13</sup>C NMR spectrum of **1** in CD<sub>3</sub>OD

**Figure S4.** DEPT 135 spectrum of **1** in CD<sub>3</sub>OD

**Figure S5.** HSQC spectrum of **1** in CD<sub>3</sub>OD

**Figure S6.** HMBC spectrum of **1** in CD<sub>3</sub>OD

**Figure S7.** <sup>1</sup>H-<sup>1</sup>H COSY spectrum of **1** in CD<sub>3</sub>OD

**Figure S8.** NOESY spectrum of **1** in CD<sub>3</sub>OD

**Figure S9.** CD spectrum of **1** in MeOH

**Figure S10.** (+)-HR-ESI-MS spectrum of **5**

**Figure S11.** <sup>1</sup>H NMR spectrum (400 MHz) of **5** in CD<sub>3</sub>OD

**Figure S12.** <sup>13</sup>C NMR spectrum (100 MHz) of **5** in CD<sub>3</sub>OD

**Figure S13.** DEPT 135 spectrum (100 MHz) of **5** in CD<sub>3</sub>OD

**Figure S14.** HSQC spectrum of **5** in CD<sub>3</sub>OD

**Figure S15.** HMBC spectrum of **5** in CD<sub>3</sub>OD

**Figure S16.** <sup>1</sup>H-<sup>1</sup>H COSY spectrum of **5** in CD<sub>3</sub>OD

**Figure S17.** NOESY spectrum of **5** in CD<sub>3</sub>OD

**Figure S18.** (+)-HR-ESI-MS spectrum of **6**

---

\* To whom correspondence should be addressed. (G.Y.) Tel: 86 15171484550. Fax: 86 27 83692762. E-mail: gyap@mail.hust.edu.cn. (Y.Z.) Tel: 86 27-83692311. Fax: 86 27 83692762. E-mail: zhangyh@mails.tjmu.edu.cn

**Figure S19.**  $^1\text{H}$  NMR spectrum (400 MHz) of **6** in  $\text{CD}_3\text{OD}$

**Figure S20.**  $^{13}\text{C}$  NMR spectrum (100 MHz) of **6** in  $\text{CD}_3\text{OD}$

**Figure S21.** DEPT 135 spectrum of **6** in  $\text{CD}_3\text{OD}$

**Figure S22.** HSQC spectrum of **6** in  $\text{CD}_3\text{OD}$

**Figure S23.** HMBC spectrum of **6** in  $\text{CD}_3\text{OD}$

**Figure S24.**  $^1\text{H}$ - $^1\text{H}$  COSY spectrum of **6** in  $\text{CD}_3\text{OD}$

**Figure S25.** NOESY spectrum of **6** in  $\text{CD}_3\text{OD}$

**Figure S26.** (+)-HR-ESI-MS spectrum of **7**

**Figure S27.**  $^1\text{H}$  NMR spectrum (400 MHz) of **7** in  $\text{CDCl}_3$

**Figure S28.**  $^{13}\text{C}$  NMR spectrum (100 MHz) of **7** in  $\text{CDCl}_3$

**Figure S29.** DEPT 135 spectrum of **7** in  $\text{CDCl}_3$

**Figure S30.** HSQC spectrum of **7** in  $\text{CDCl}_3$

**Figure S31.** HMBC spectrum of **7** in  $\text{CDCl}_3$

**Figure S32.**  $^1\text{H}$ - $^1\text{H}$  COSY spectrum of **7** in  $\text{CDCl}_3$

**Figure S33.** (+)-HR-ESI-MS spectrum of **8**

**Figure S34.**  $^1\text{H}$  NMR spectrum (400 MHz) of **8** in  $\text{CDCl}_3$

**Figure S35.**  $^{13}\text{C}$  NMR spectrum (100 MHz) of **8** in  $\text{CDCl}_3$

**Figure S36.** DEPT 135 spectrum of **8** in  $\text{CDCl}_3$

**Figure S37.** HSQC spectrum of **8** in  $\text{CDCl}_3$

**Figure S38.** HMBC spectrum of **8** in  $\text{CDCl}_3$

**Figure S39.**  $^1\text{H}$ - $^1\text{H}$  COSY spectrum of **8** in  $\text{CDCl}_3$

**Figure S40.** (+)-HR-ESI-MS spectrum of **9**

**Figure S41.**  $^1\text{H}$  NMR spectrum (400 MHz) of **9** in  $\text{CDCl}_3$

**Figure S42.**  $^{13}\text{C}$  NMR spectrum (100 MHz) of **9** in  $\text{CDCl}_3$

**Figure S43.** DEPT 135 spectrum of **9** in  $\text{CDCl}_3$

**Figure S44.** HSQC spectrum of **9** in  $\text{CDCl}_3$

**Figure S45.** HMBC spectrum of **9** in  $\text{CDCl}_3$

**Figure S46.**  $^1\text{H}$ - $^1\text{H}$  COSY spectrum of **9** in  $\text{CDCl}_3$

**Figure S47.** (+)-HR-ESI-MS spectrum of **10**

**Figure S48.**  $^1\text{H}$  NMR spectrum (400 MHz) of **10** in  $\text{CDCl}_3$

**Figure S49.**  $^{13}\text{C}$  NMR spectrum (100 MHz) of **10** in  $\text{CDCl}_3$

**Figure S50.** DEPT 135 spectrum of **10** in  $\text{CDCl}_3$

**Figure S51.** HSQC spectrum of **10** in  $\text{CDCl}_3$

**Figure S52.** HMBC spectrum of **10** in  $\text{CDCl}_3$

**Figure S53.**  $^1\text{H}$ - $^1\text{H}$  COSY spectrum of **10** in  $\text{CDCl}_3$

**Figure S54.** Crystal Cell packing of compound **1**

**Figure S55.** Crystal packing of compound **3** at 100 (2) K

**Table S1.** Cytotoxicity of Compounds 1–15 ( $\text{IC}_{50}$  in  $\mu\text{M}$ ) Against Five Cancer Cell Lines and One Non-Cancerous Human Beas-2B Cell Line

**Figure S1.** HR-MS spectrum of **1**

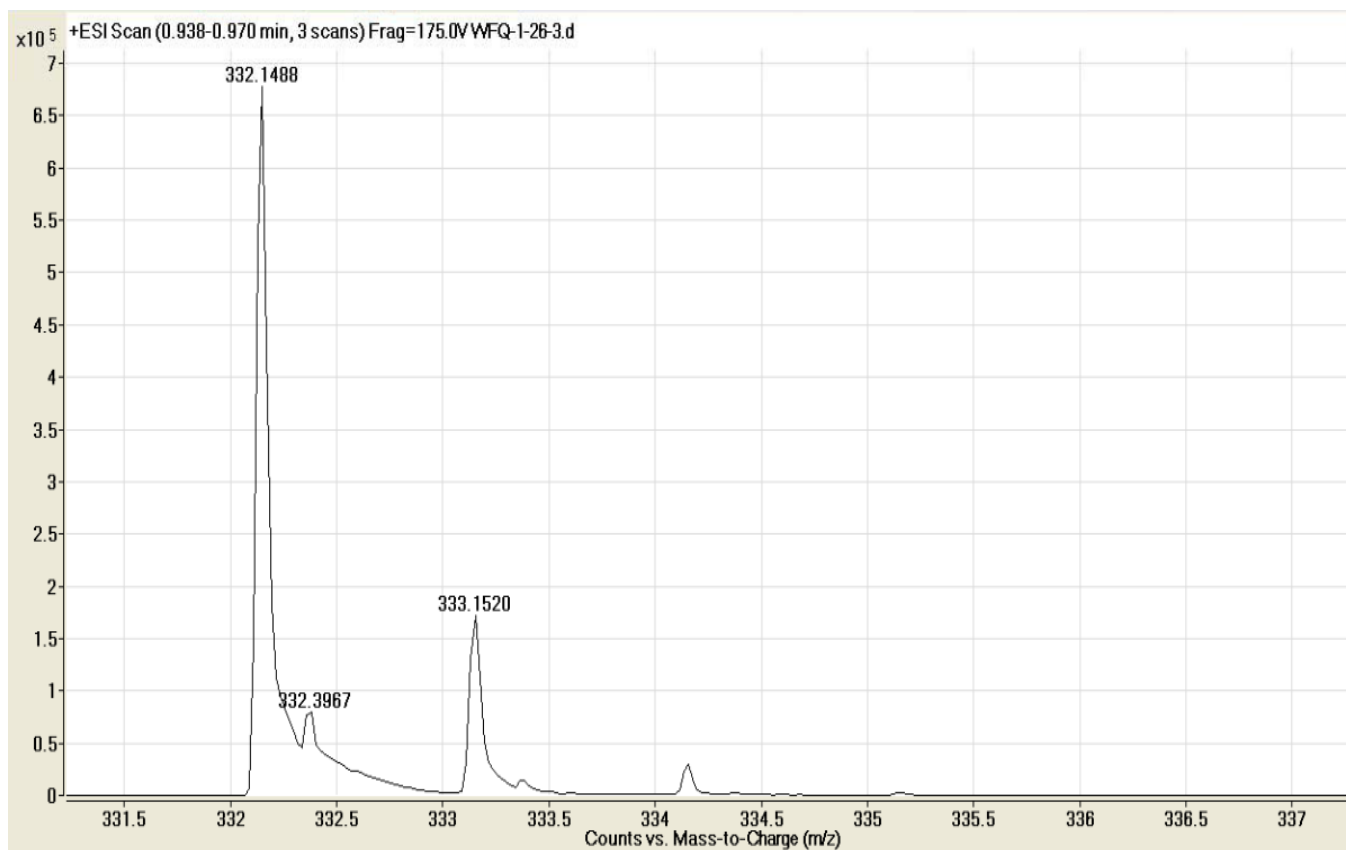

**Figure S2.** <sup>1</sup>H NMR spectrum (400 MHz) of **1** in CD<sub>3</sub>OD

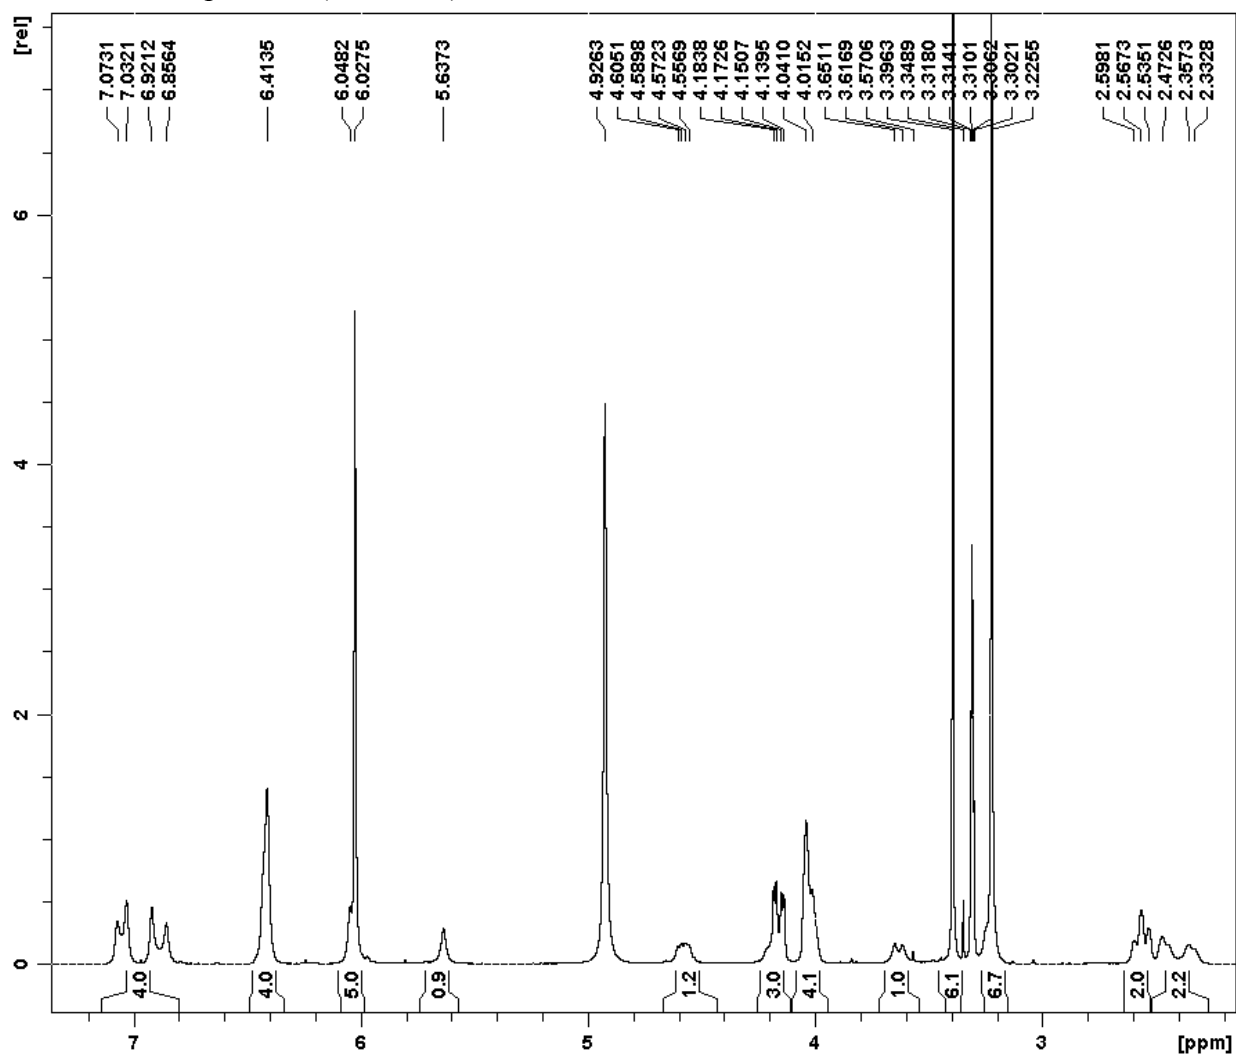

Figure S3.  $^{13}\text{C}$  NMR spectrum (100 MHz) of **1** in  $\text{CD}_3\text{OD}$

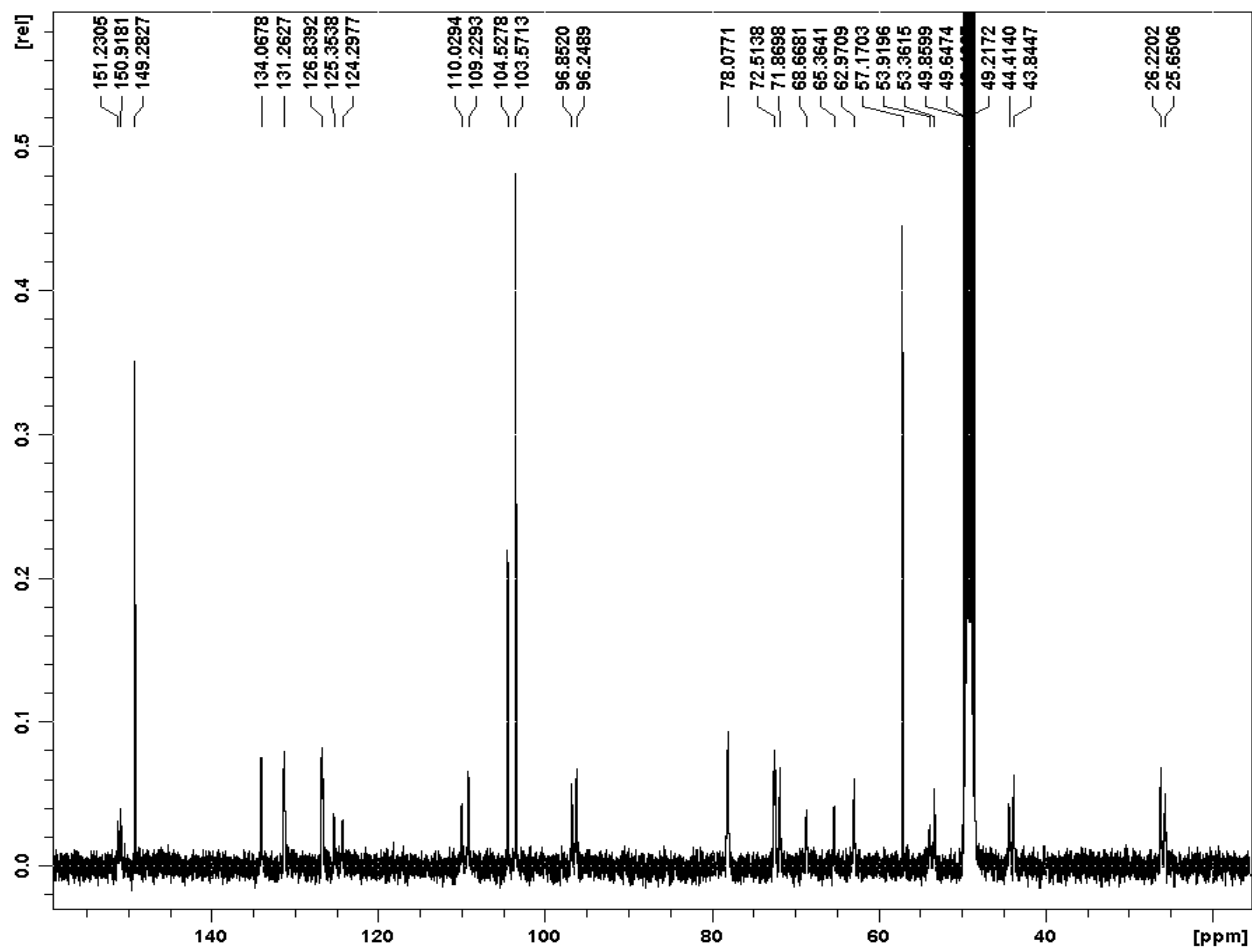

Figure S4. DEPT 135 spectrum (100 MHz) of **1** in  $\text{CD}_3\text{OD}$

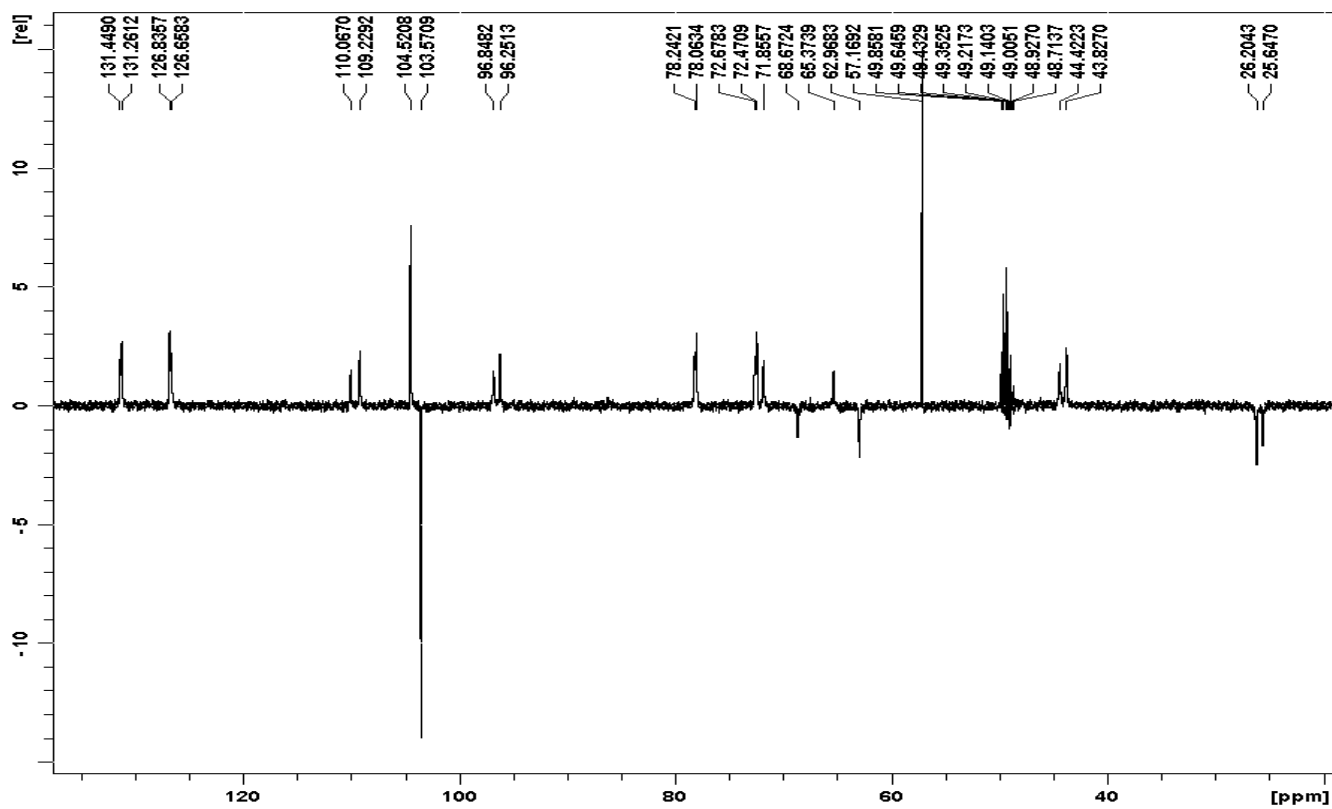

Figure S5. HSQC spectrum of **1** in CD<sub>3</sub>OD

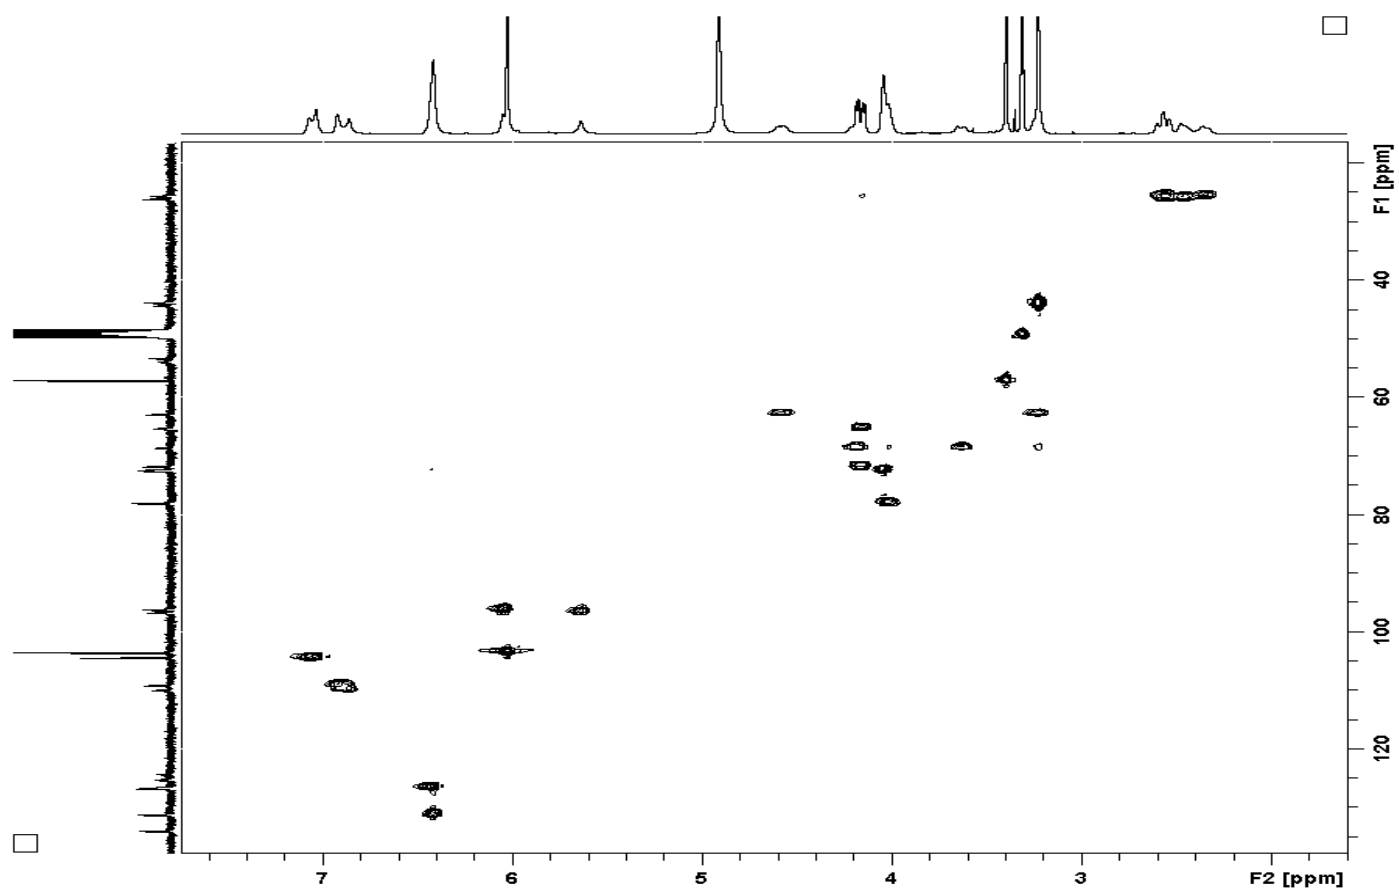

Figure S 6. HMBC spectrum of **1** in CD<sub>3</sub>OD

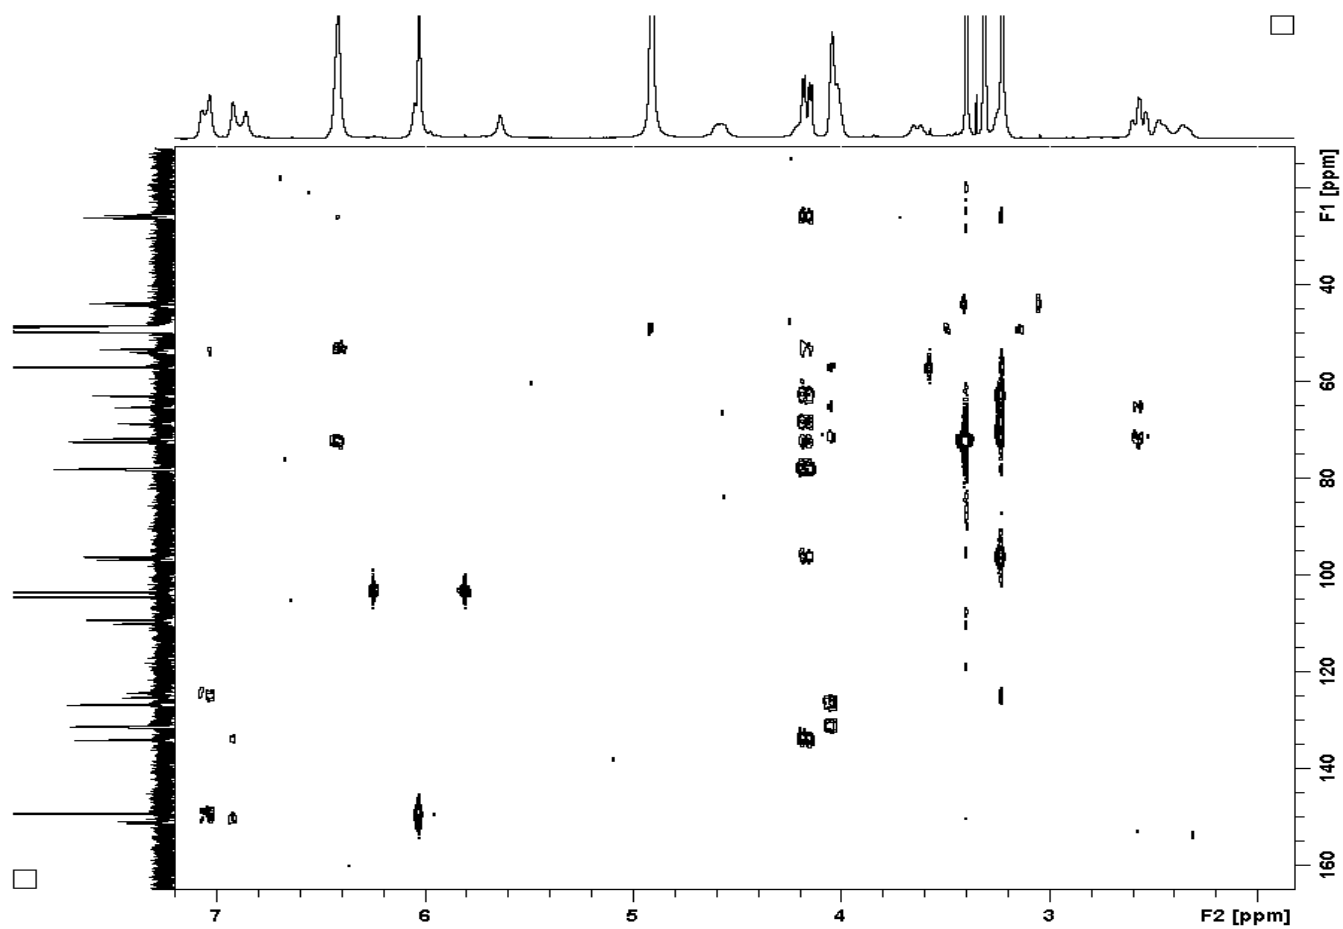

**Figure S7.**  $^1\text{H}$ - $^1\text{H}$  COSY spectrum of **1** in  $\text{CD}_3\text{OD}$

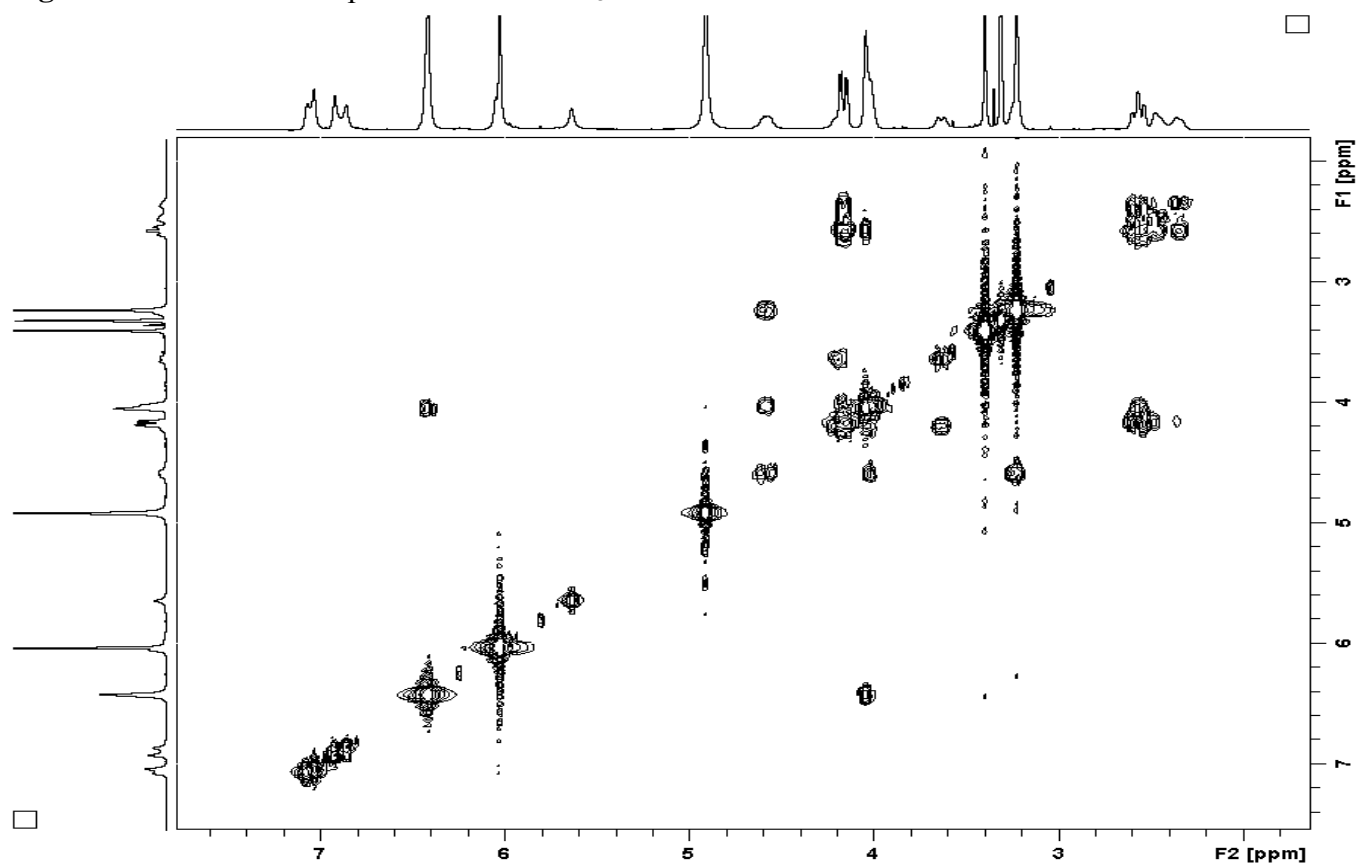

**Figure S8.** NOESY spectrum of **1** in  $\text{CD}_3\text{OD}$

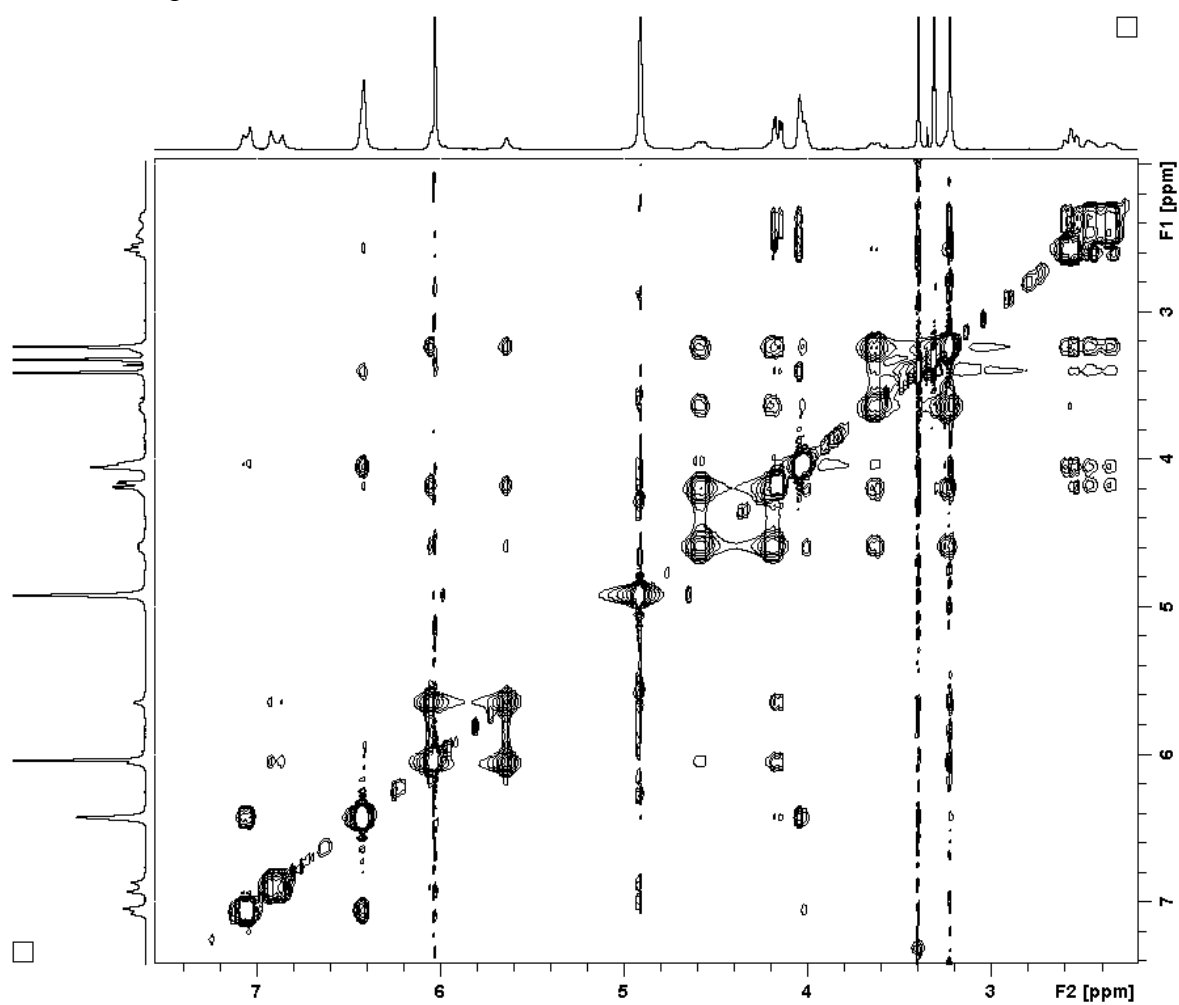

**Figure S9.** CD spectrum of **1** in MeOH

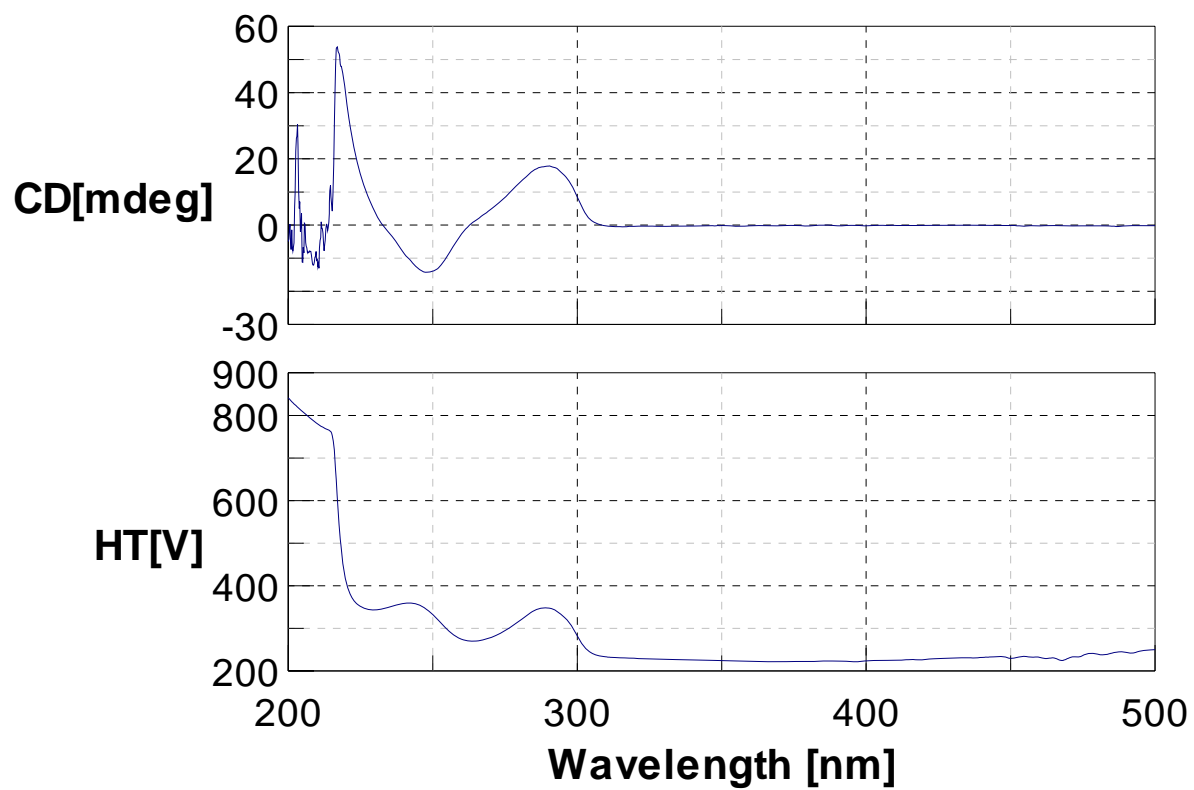

**Figure S10.** (+)-HR-ESI-MS spectrum of **5**

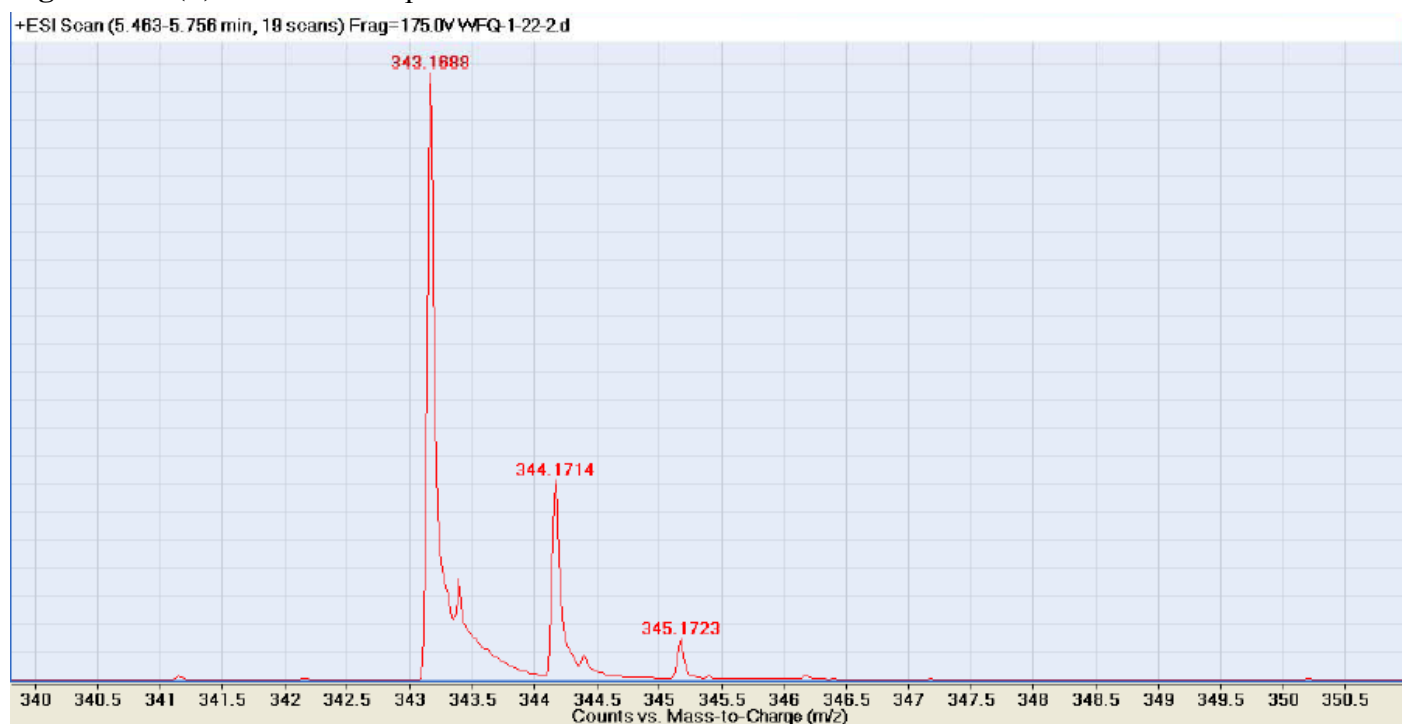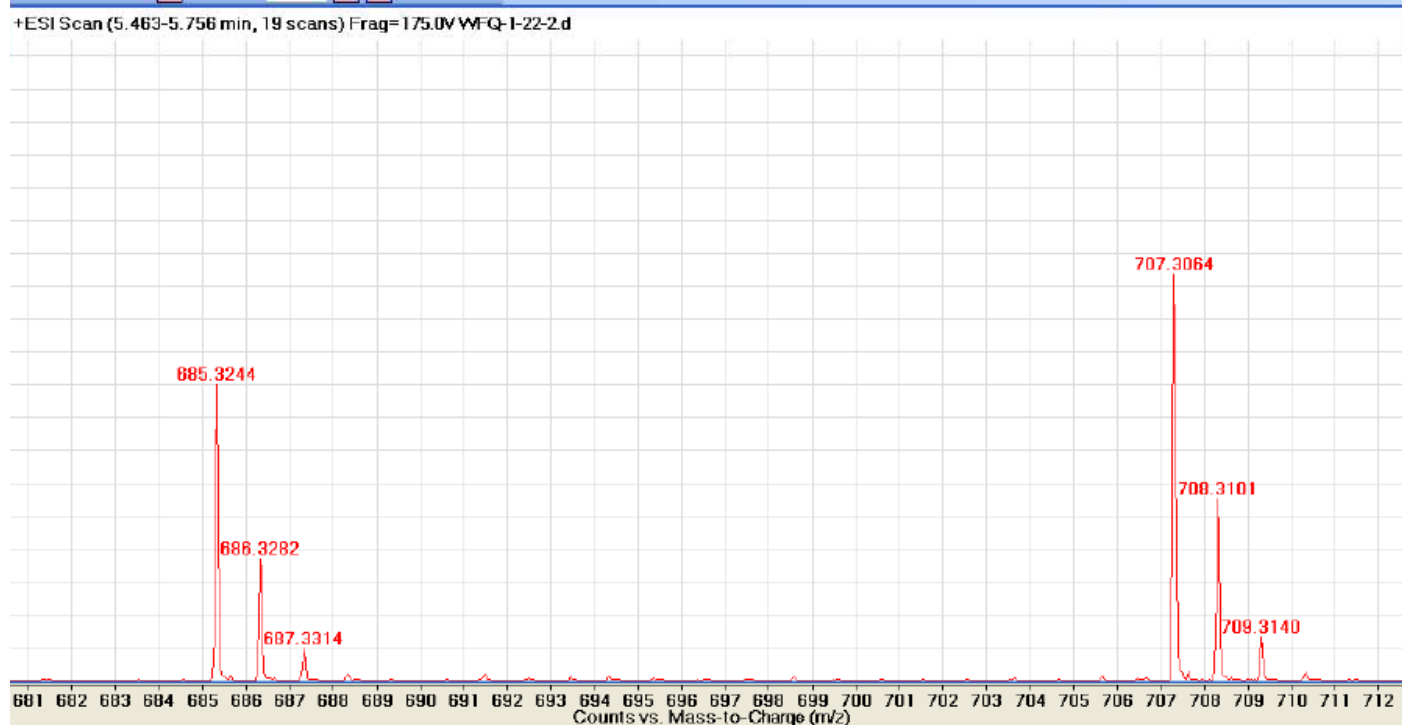



**Figure S11.**  $^1\text{H}$  NMR spectrum (400 MHz) of **5** in  $\text{CD}_3\text{OD}$

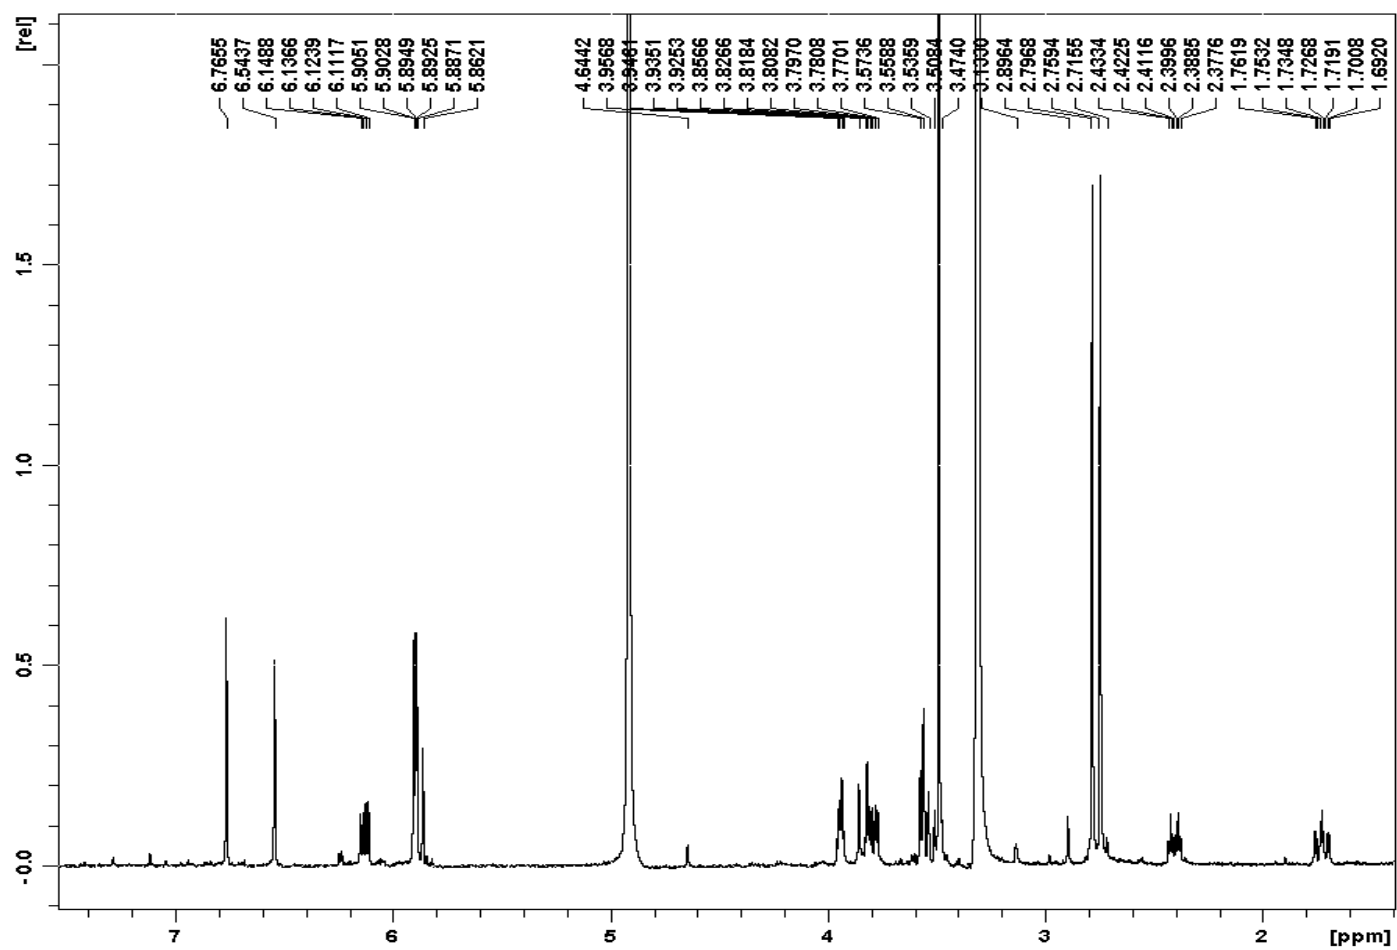

**Figure S12.**  $^{13}\text{C}$  NMR spectrum (100 MHz) of **5** in  $\text{CD}_3\text{OD}$

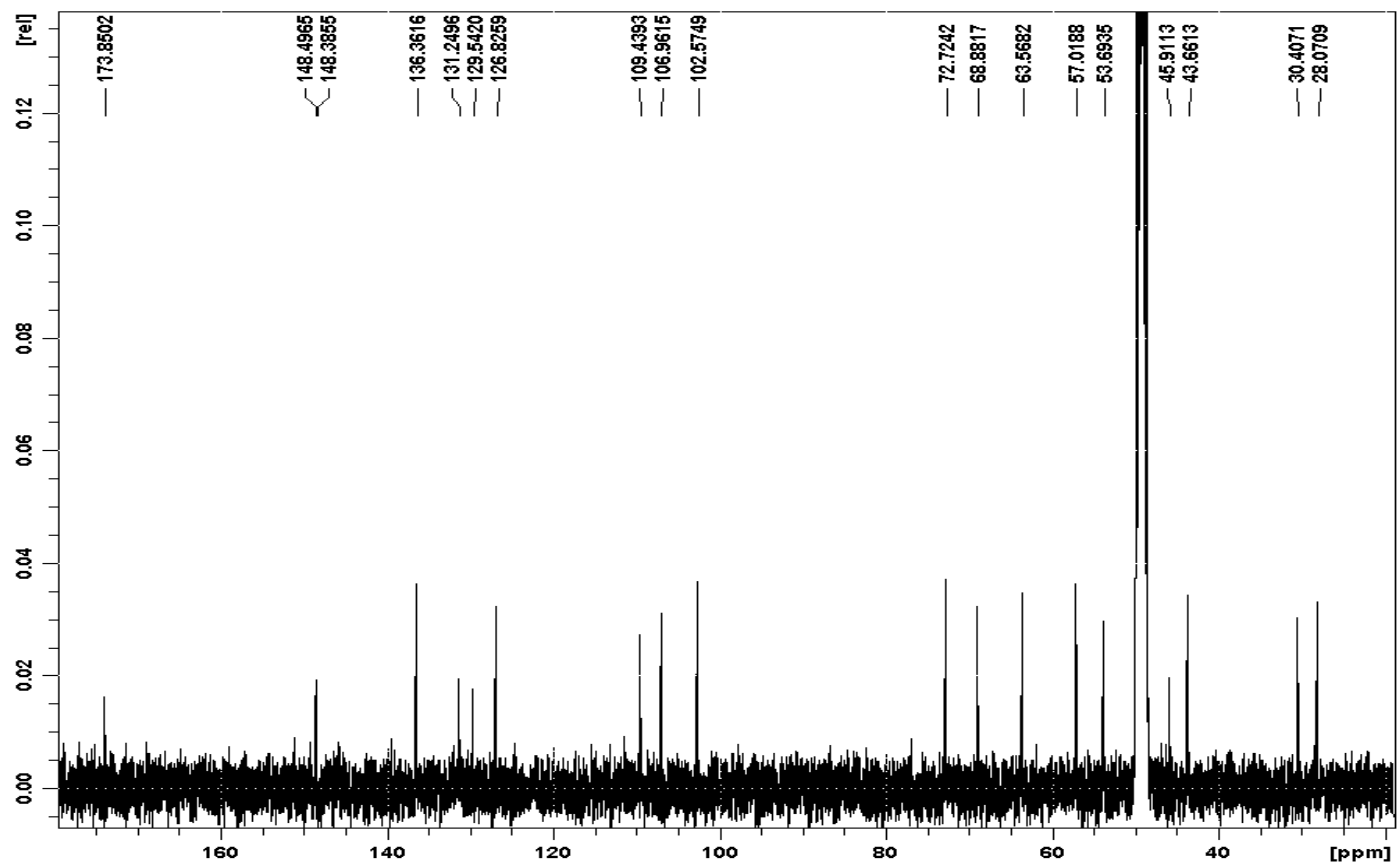

Figure S13. DEPT 135 spectrum (100 MHz) of **5** in CD<sub>3</sub>OD

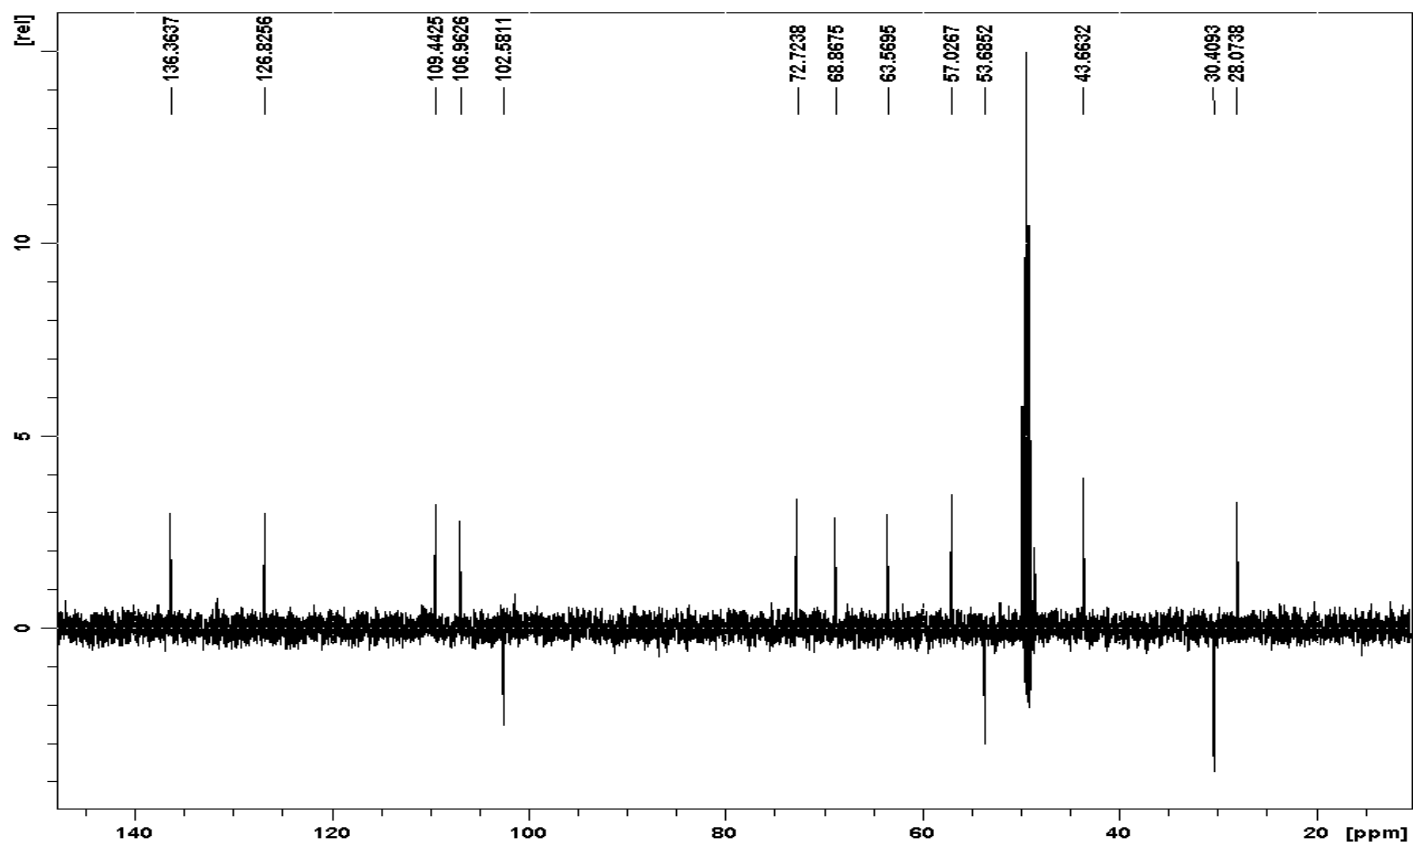

Figure S14. HSQC spectrum of **5** in CD<sub>3</sub>OD

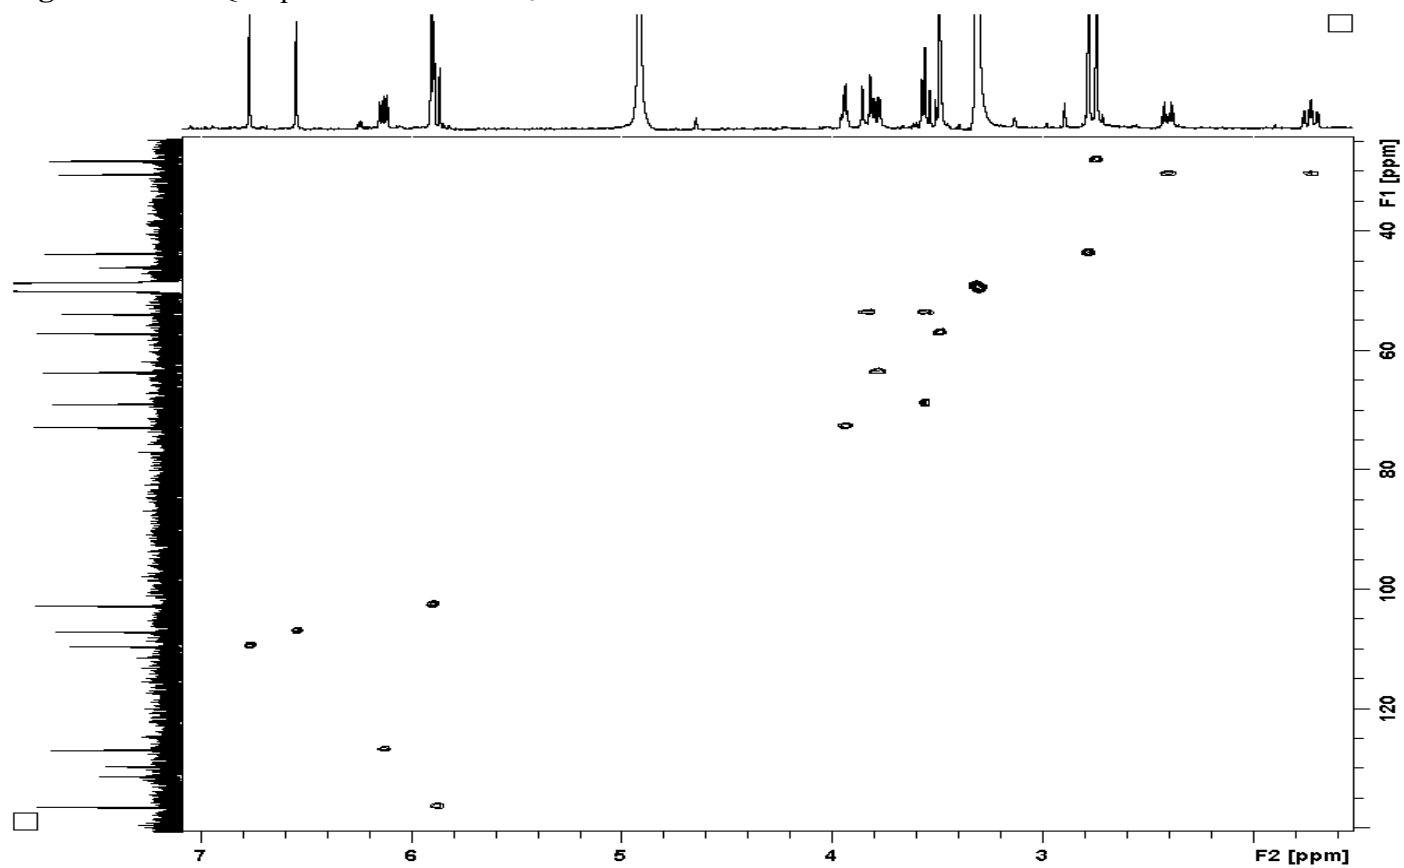

Figure S15. HMBC spectrum of **5** in CD<sub>3</sub>OD

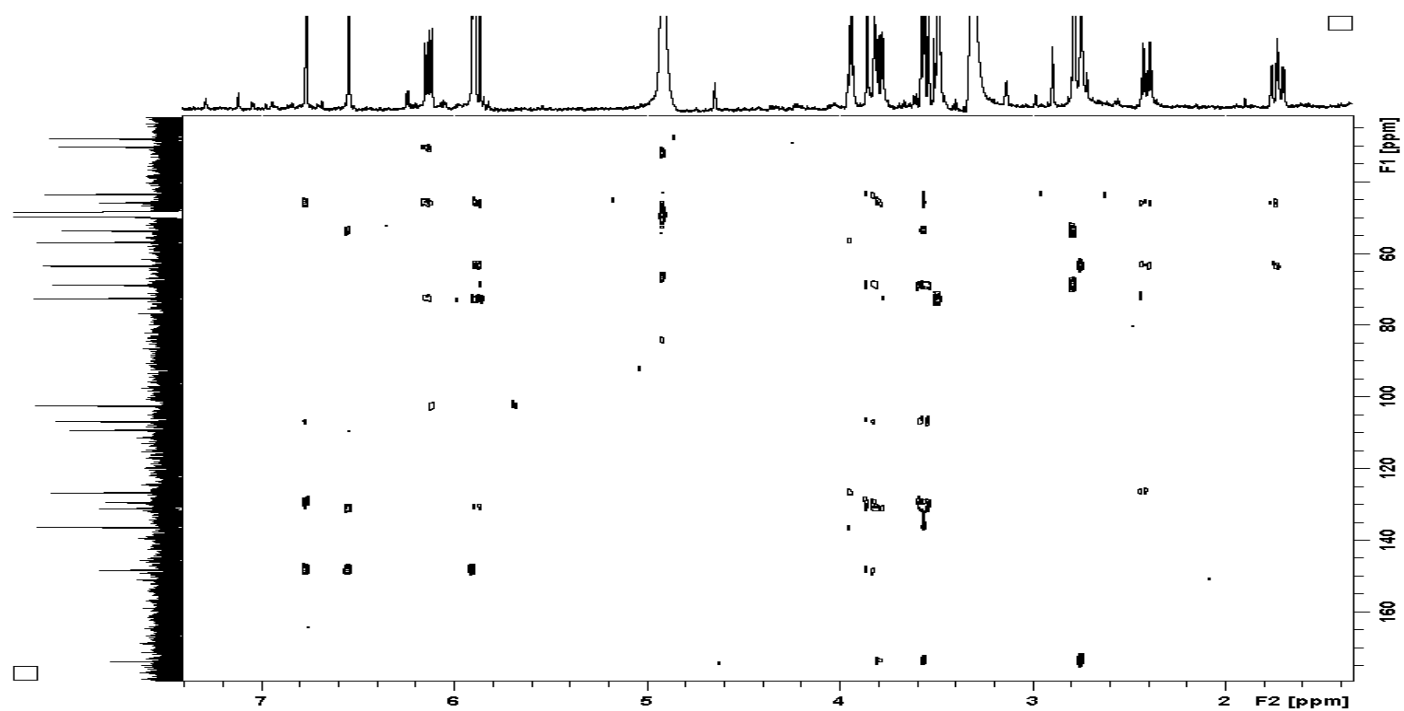

Figure S16. <sup>1</sup>H-<sup>1</sup>H COSY spectrum of **5** in CD<sub>3</sub>OD

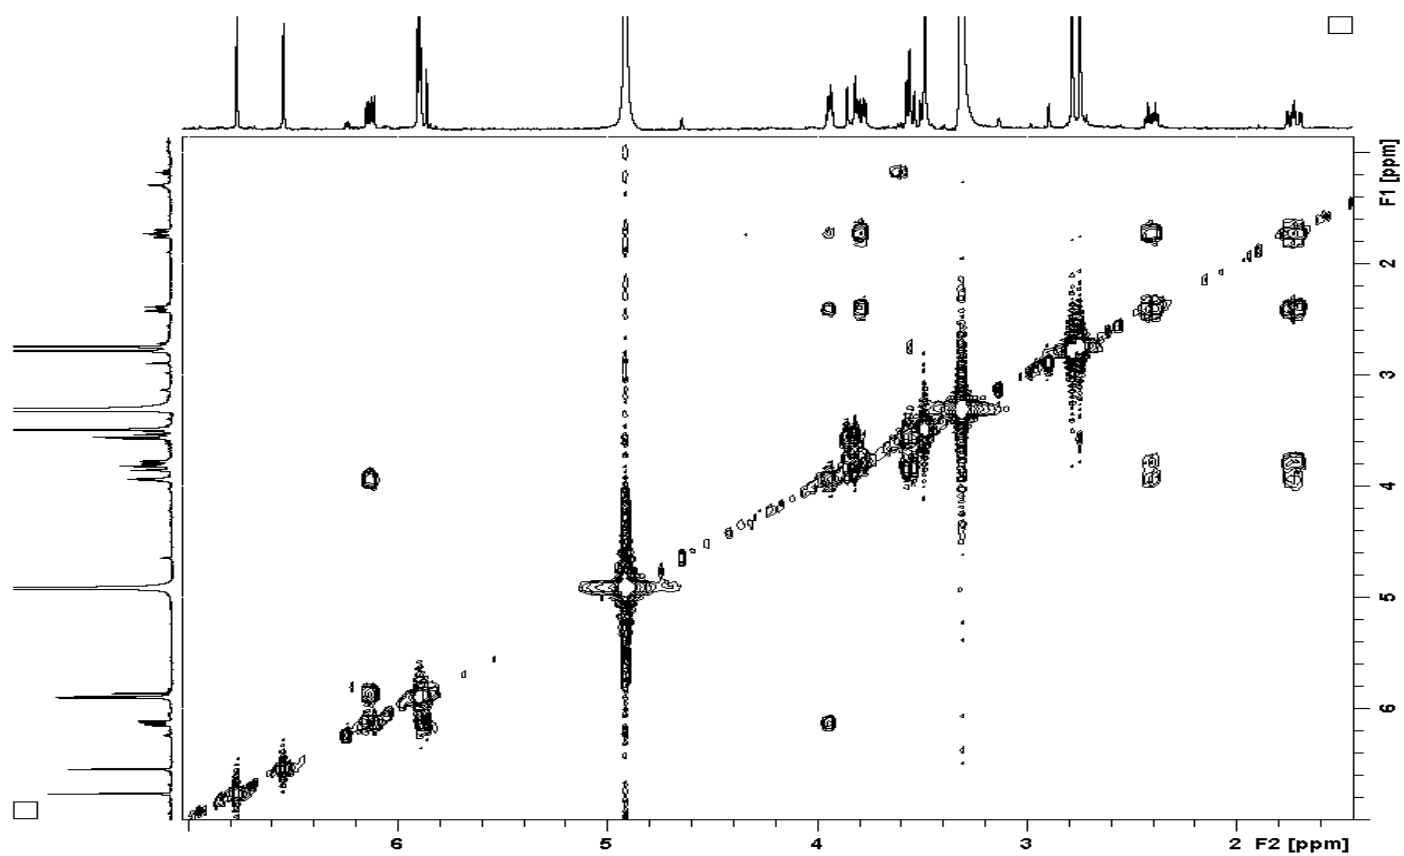

Figure S17. NOESY spectrum of **5** in CD<sub>3</sub>OD

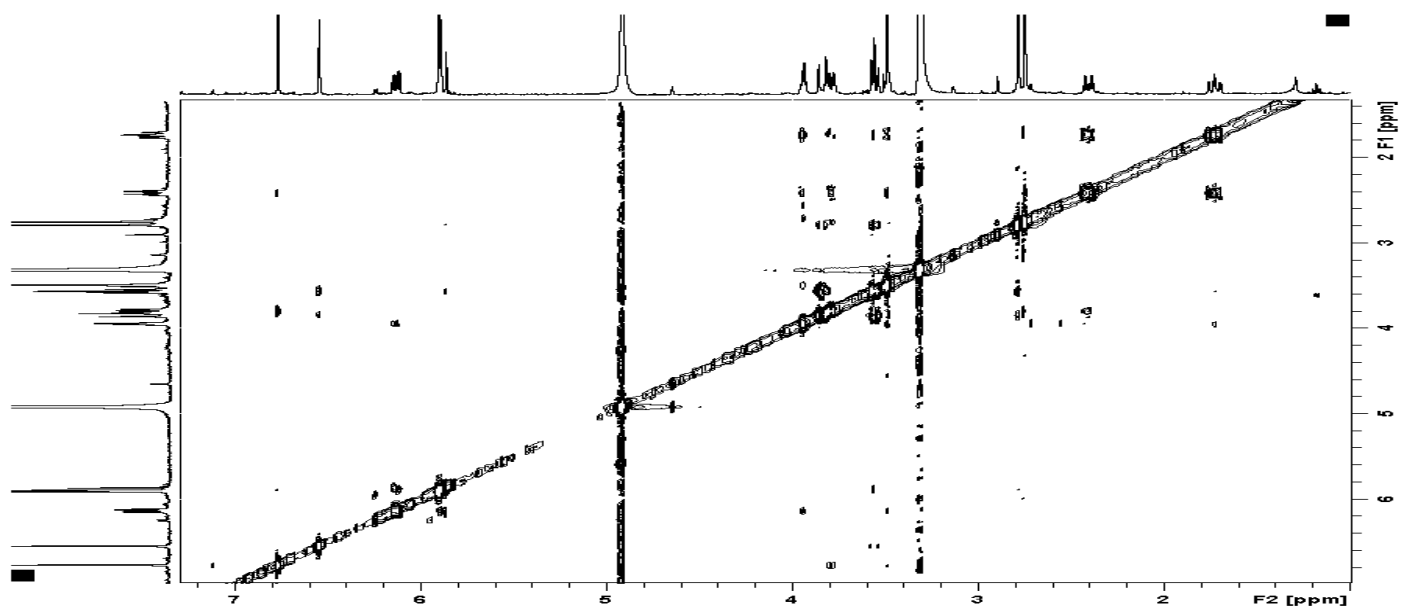

**Figure S18.** (+)-HR-ESI-MS spectrum of **6**

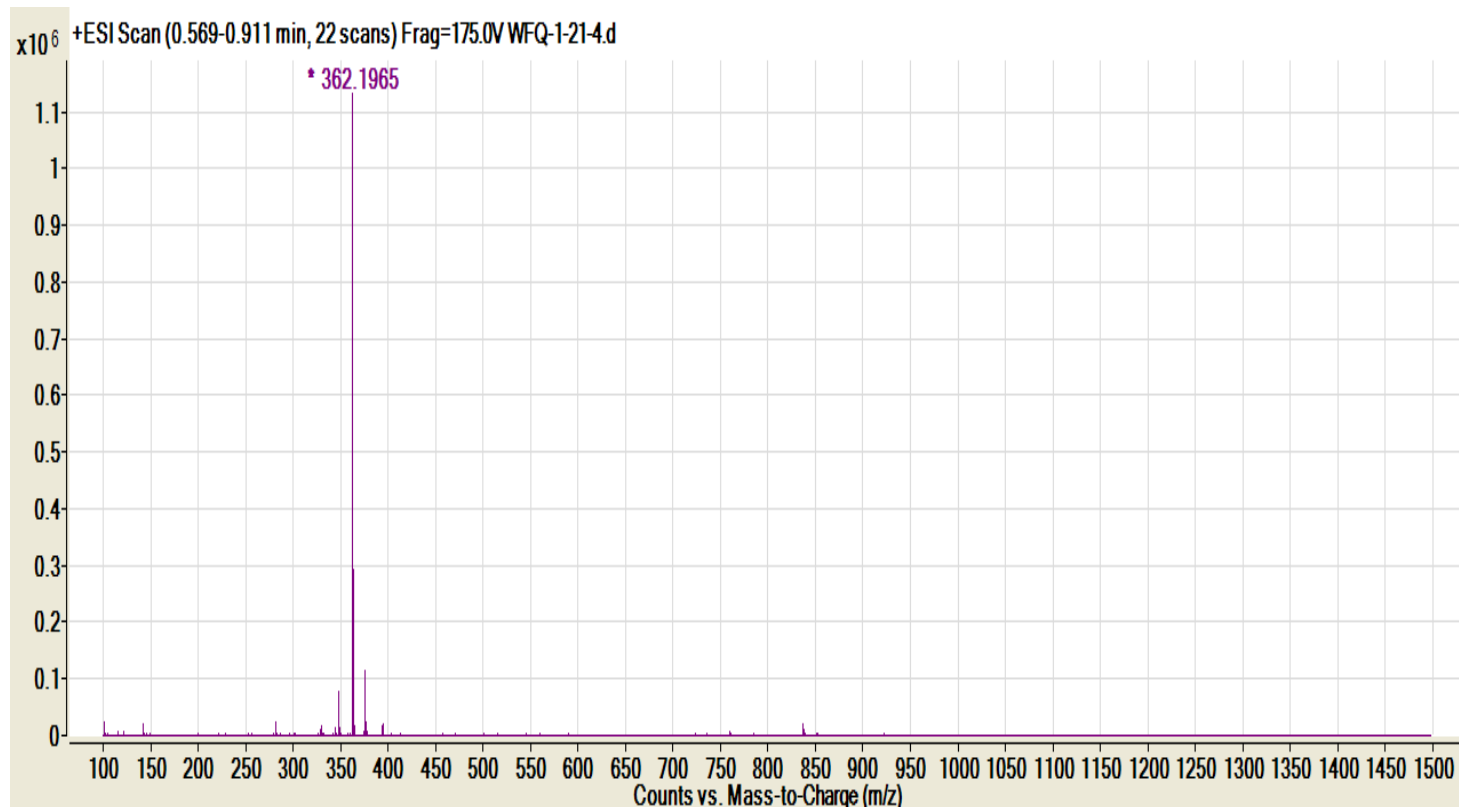

**Figure S19.** <sup>1</sup>H NMR spectrum (400 MHz) of **6** in CD<sub>3</sub>OD

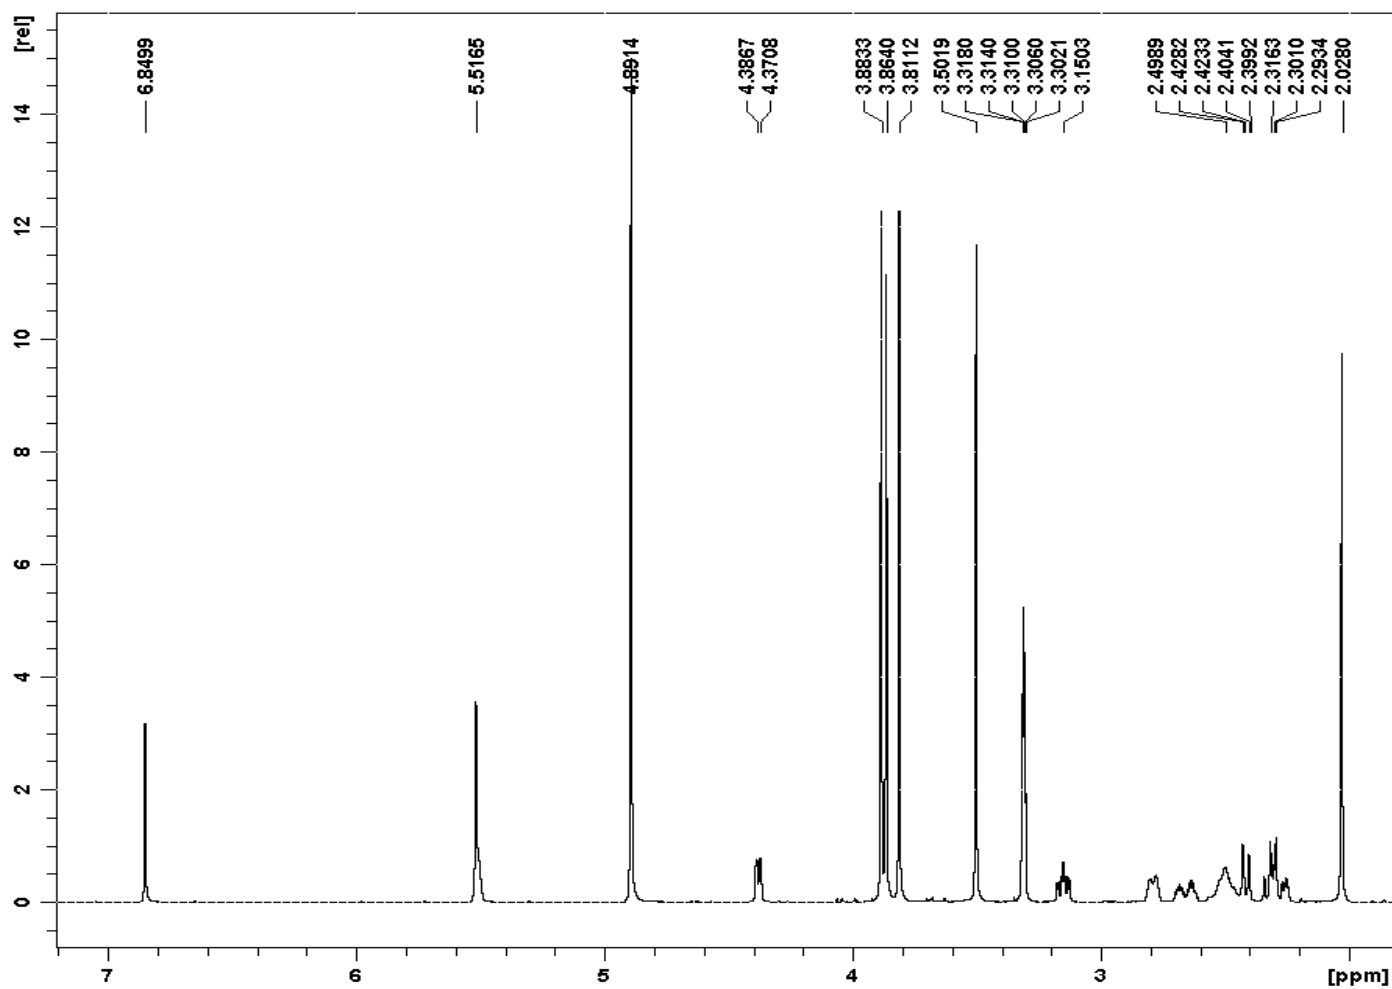

Figure S20.  $^{13}\text{C}$  NMR spectrum (100 MHz) of **6** in  $\text{CD}_3\text{OD}$

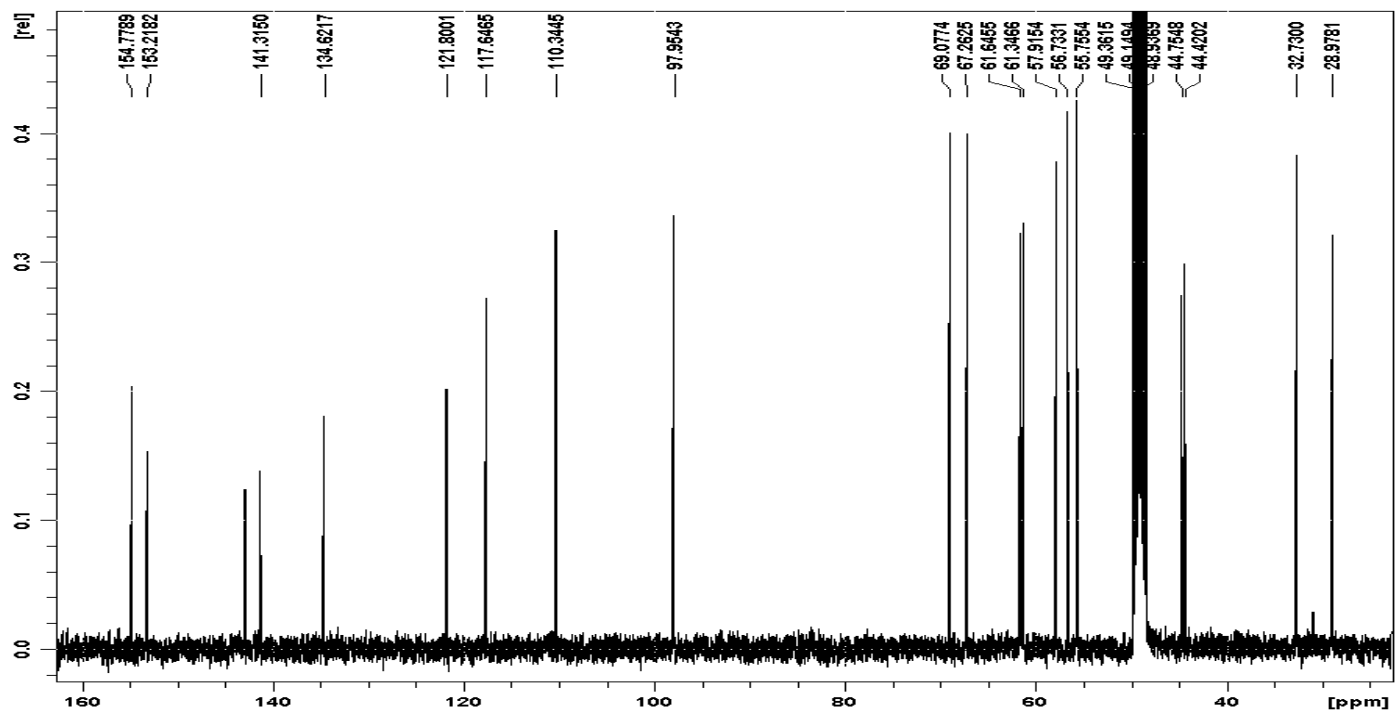

Figure S21. DEPT 135 spectrum of **6** in  $\text{CD}_3\text{OD}$

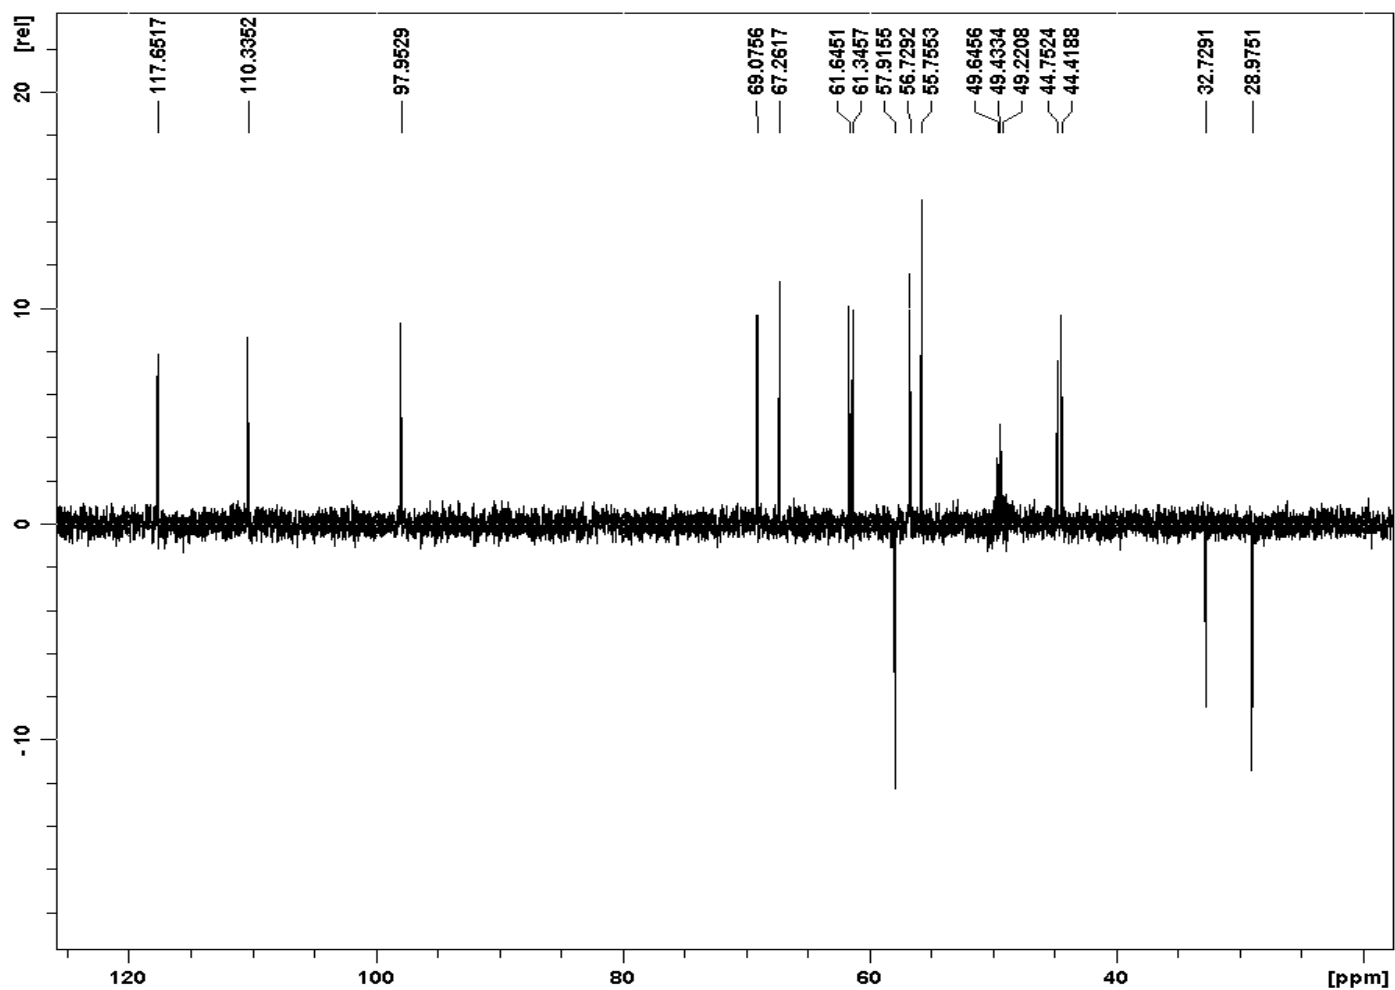

Figure S22. HSQC spectrum of **6** in CD<sub>3</sub>OD

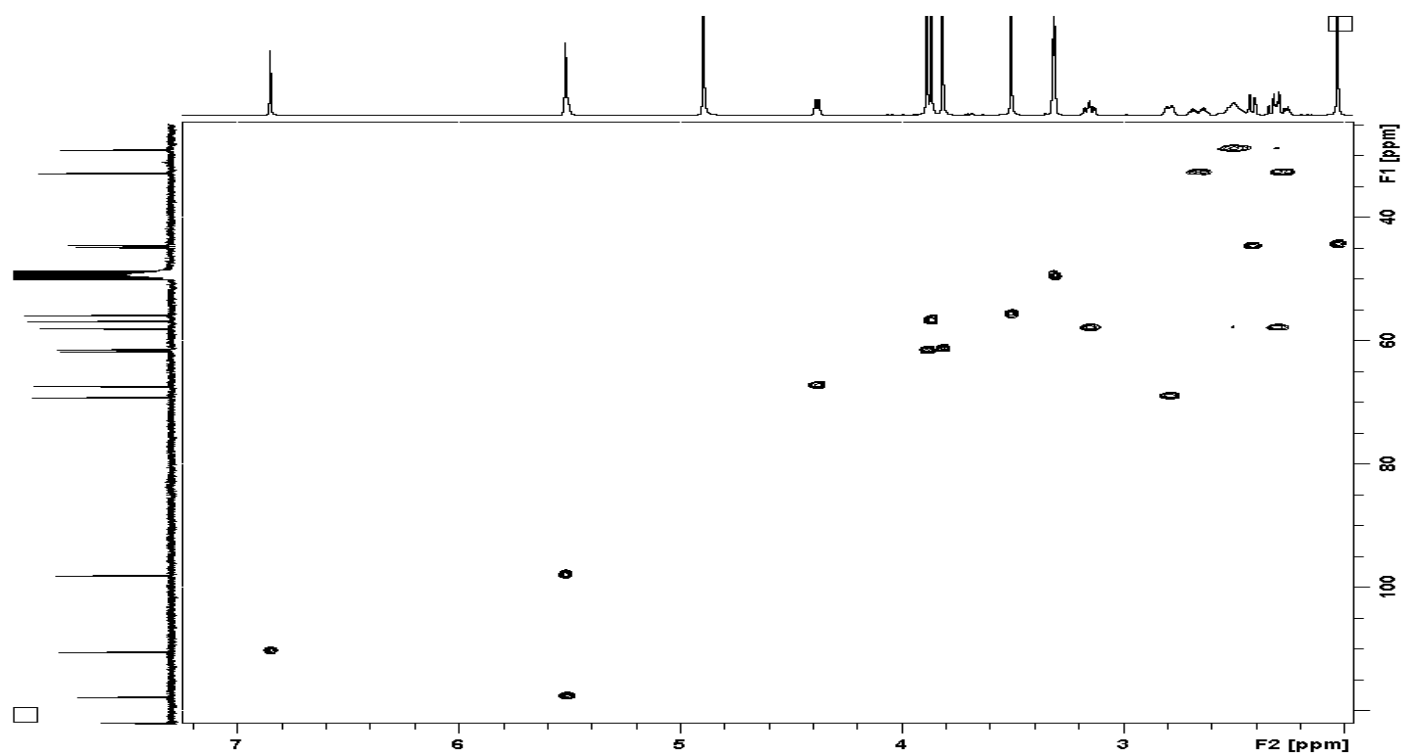

Figure S23. HMBC spectrum of **6** in CD<sub>3</sub>OD

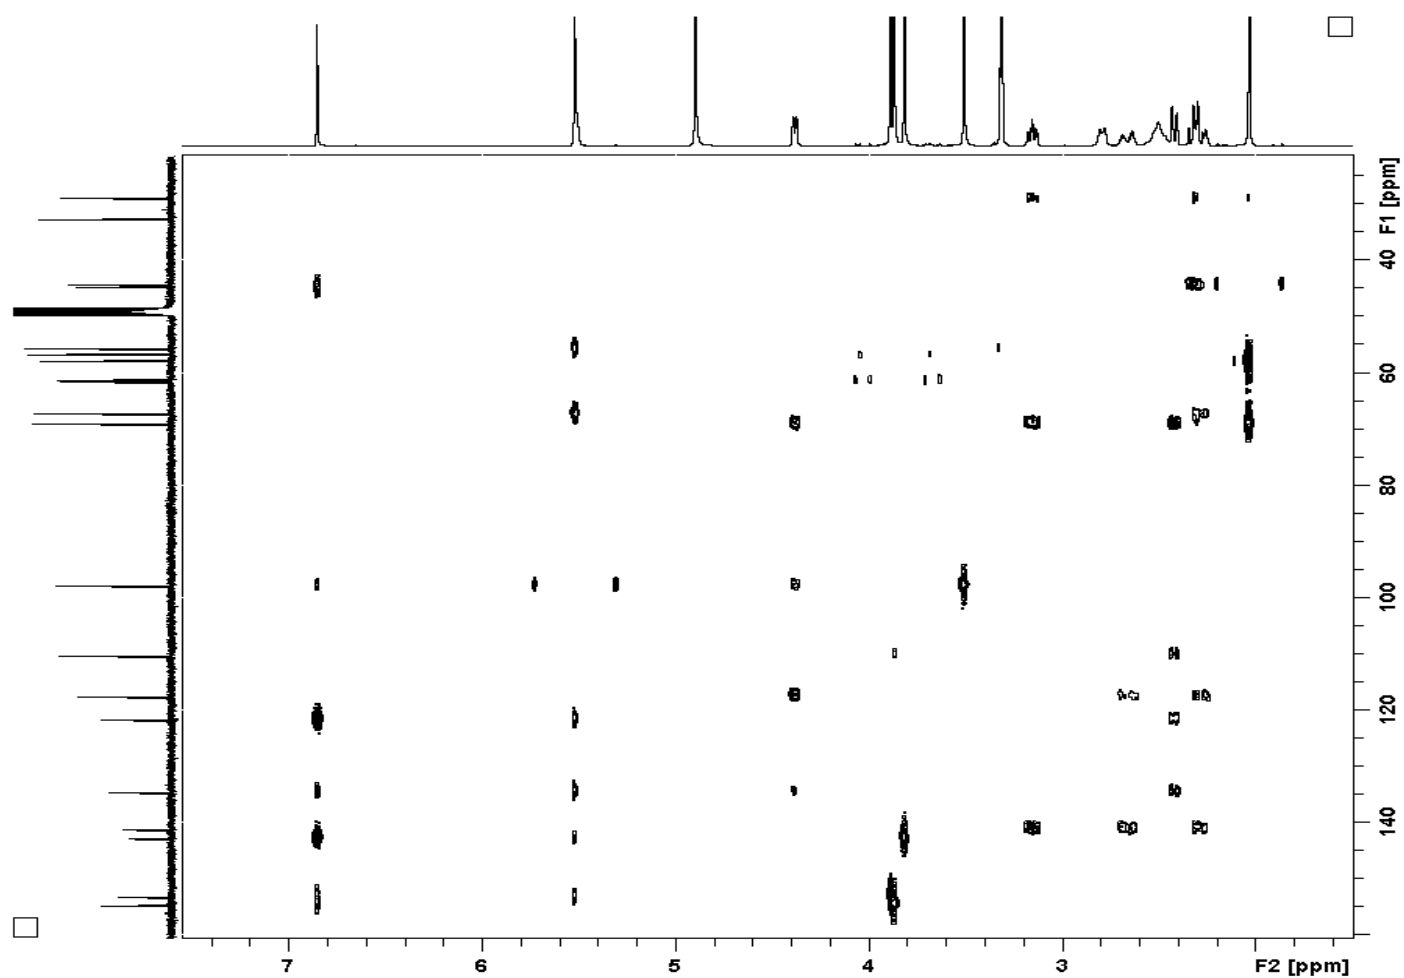

Figure S24  $^1\text{H}$ - $^1\text{H}$  COSY spectrum of **6** in  $\text{CD}_3\text{OD}$

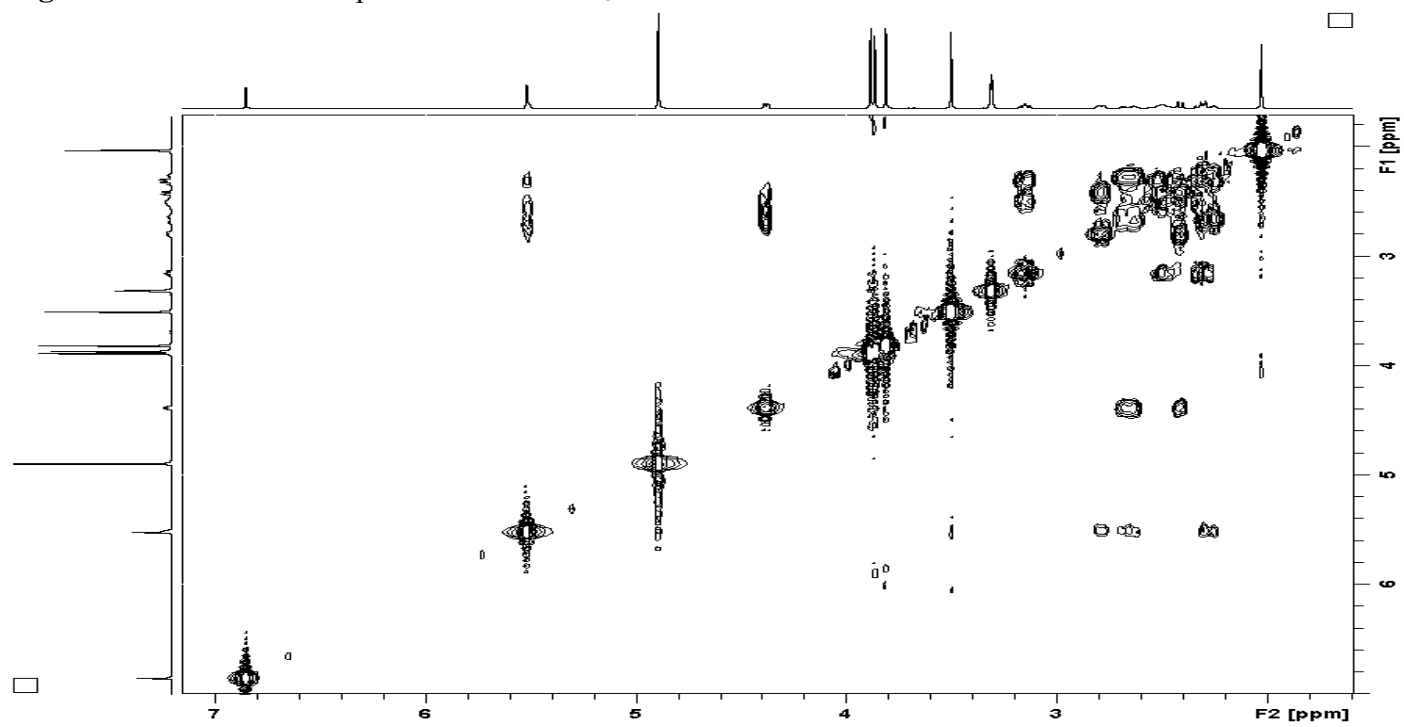

Figure S25. NOESY spectrum of **6** in  $\text{CD}_3\text{OD}$

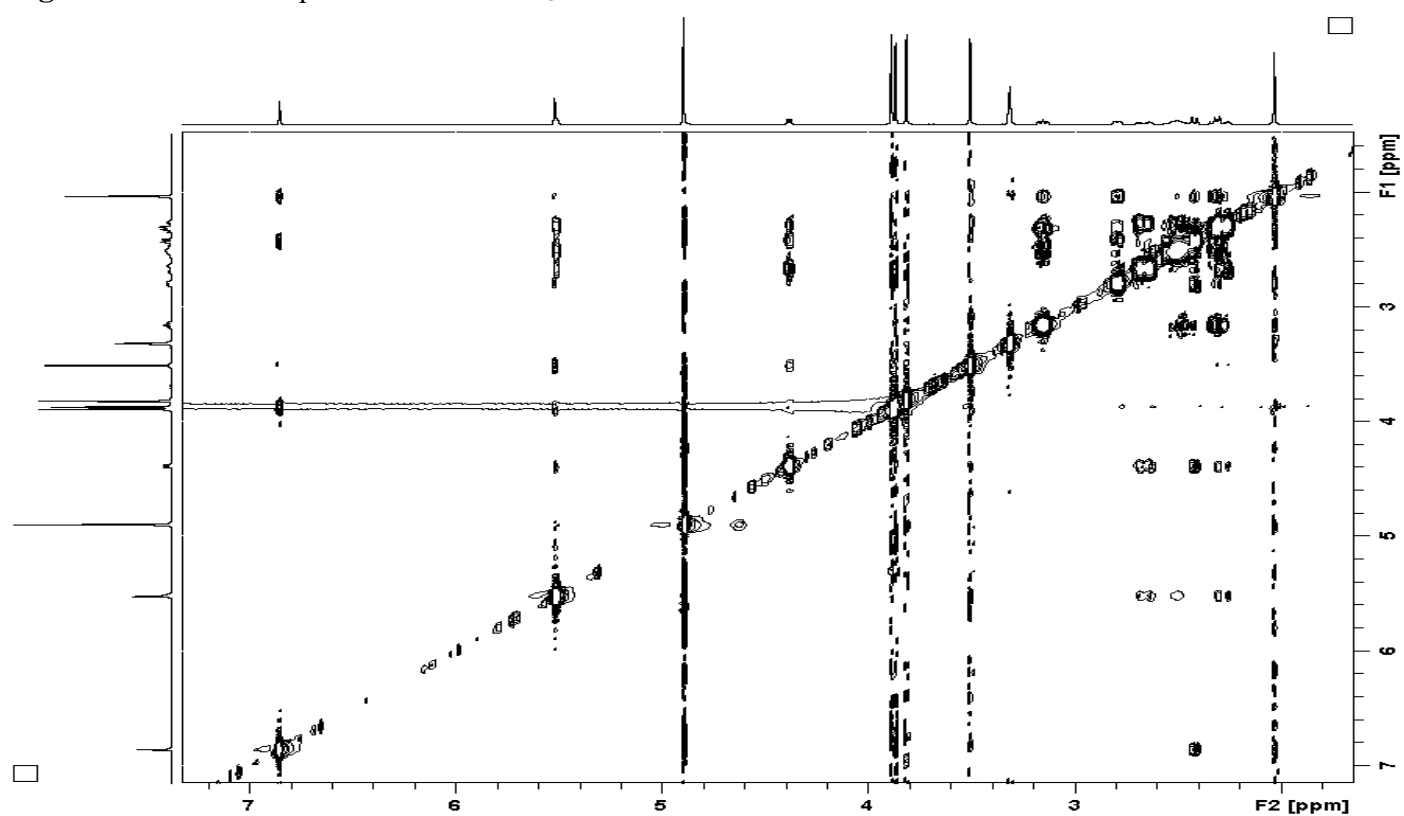



**Figure S26.** (+)-HR-ESI-MS spectrum of **7**

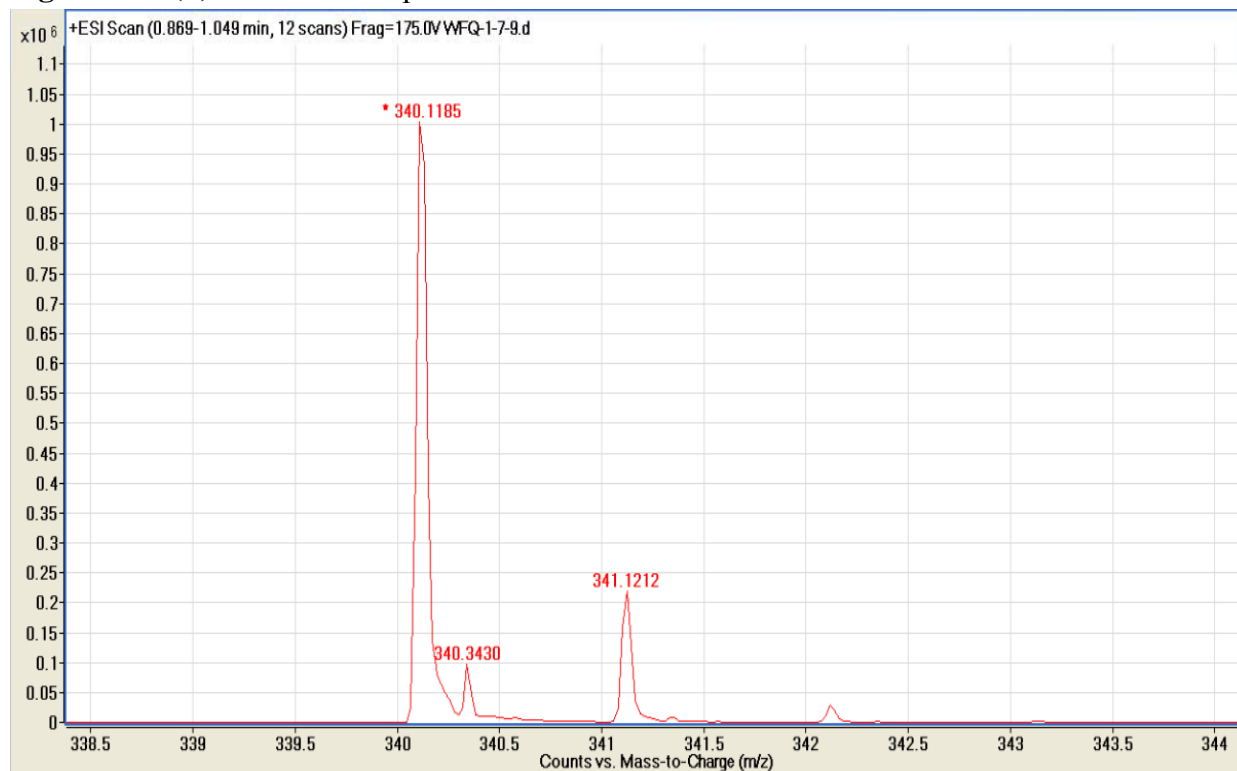

Figure S27.  $^1\text{H}$  NMR spectrum (400 MHz) of **7** in  $\text{CDCl}_3$

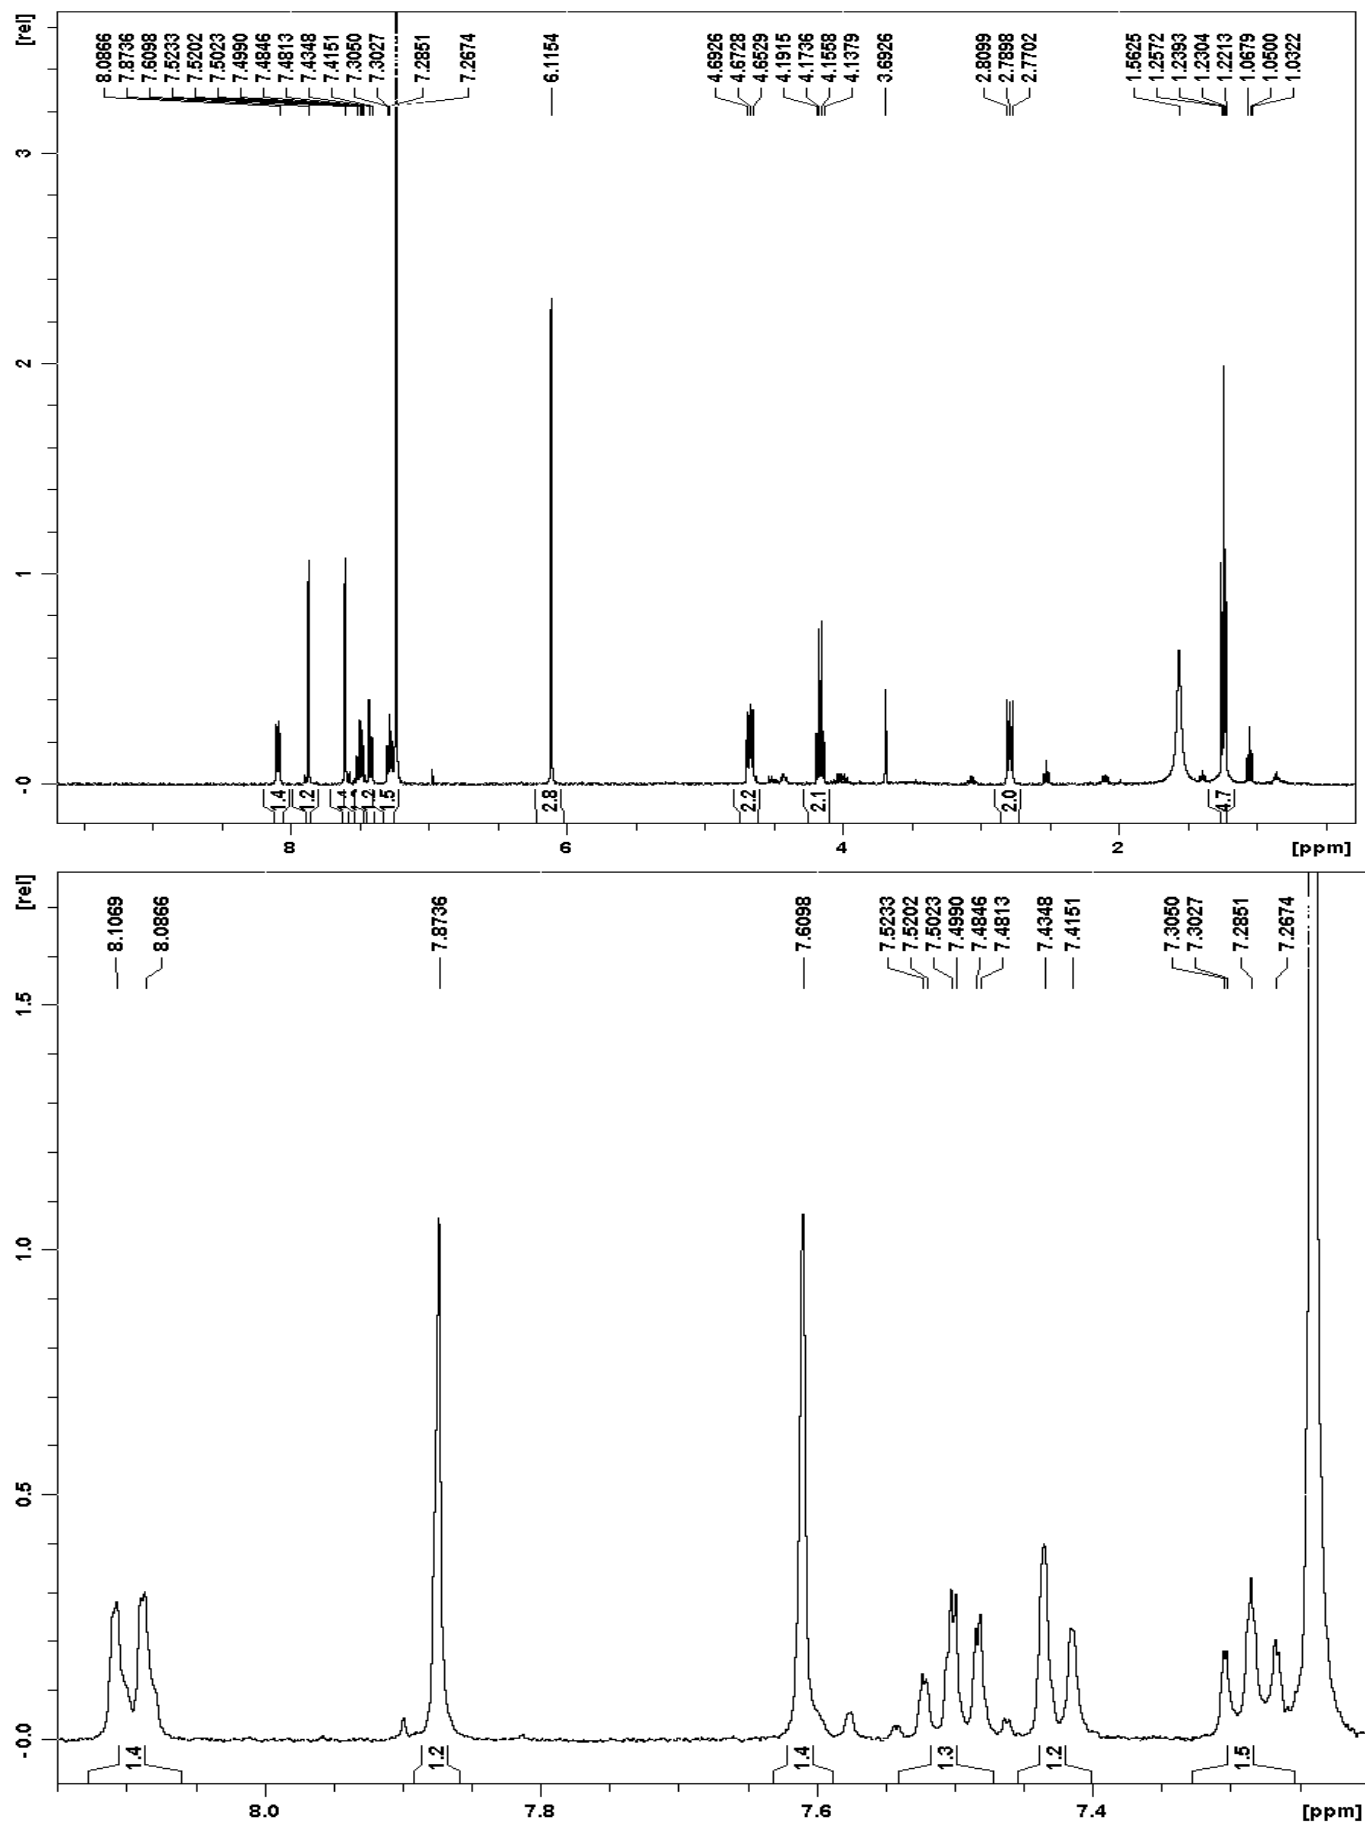

Figure S28.  $^{13}\text{C}$  NMR spectrum (100 MHz) of **7** in  $\text{CDCl}_3$

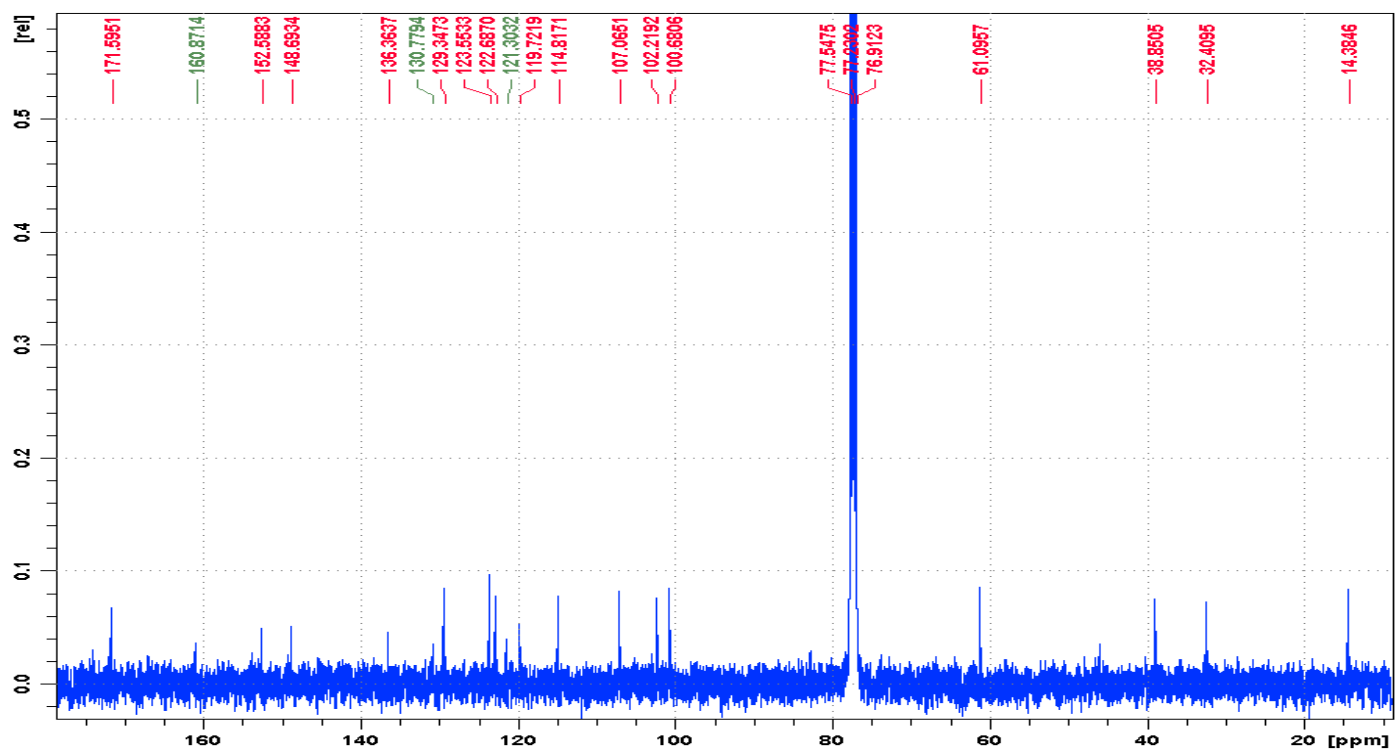

Figure S29. DEPT 135 spectrum of **7** in  $\text{CDCl}_3$

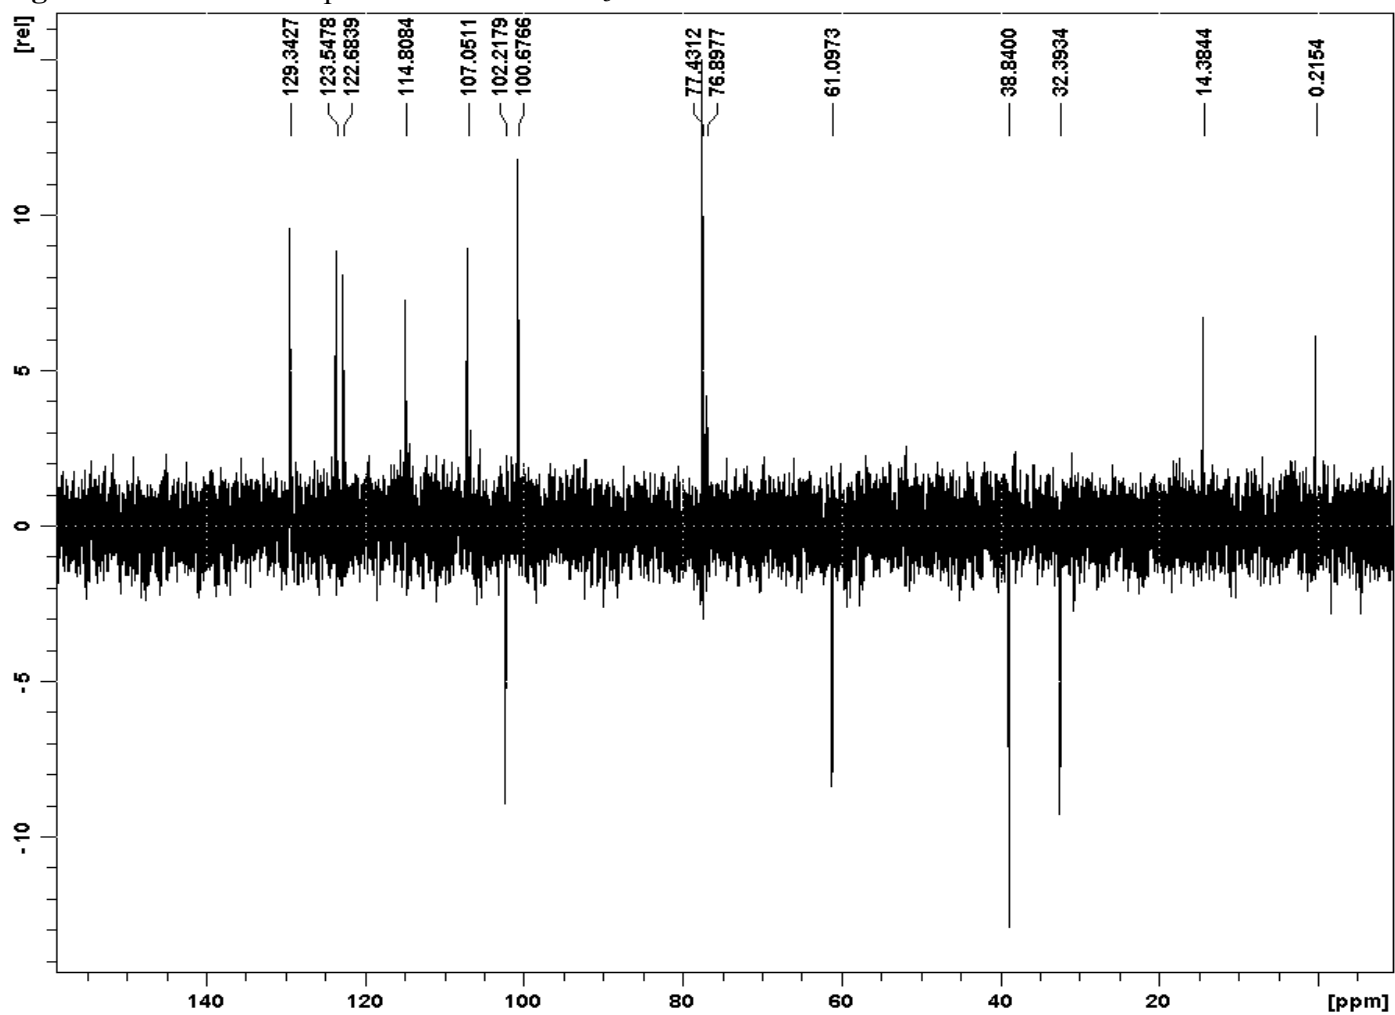

Figure S30. HSQC spectrum of **7** in CDCl<sub>3</sub>

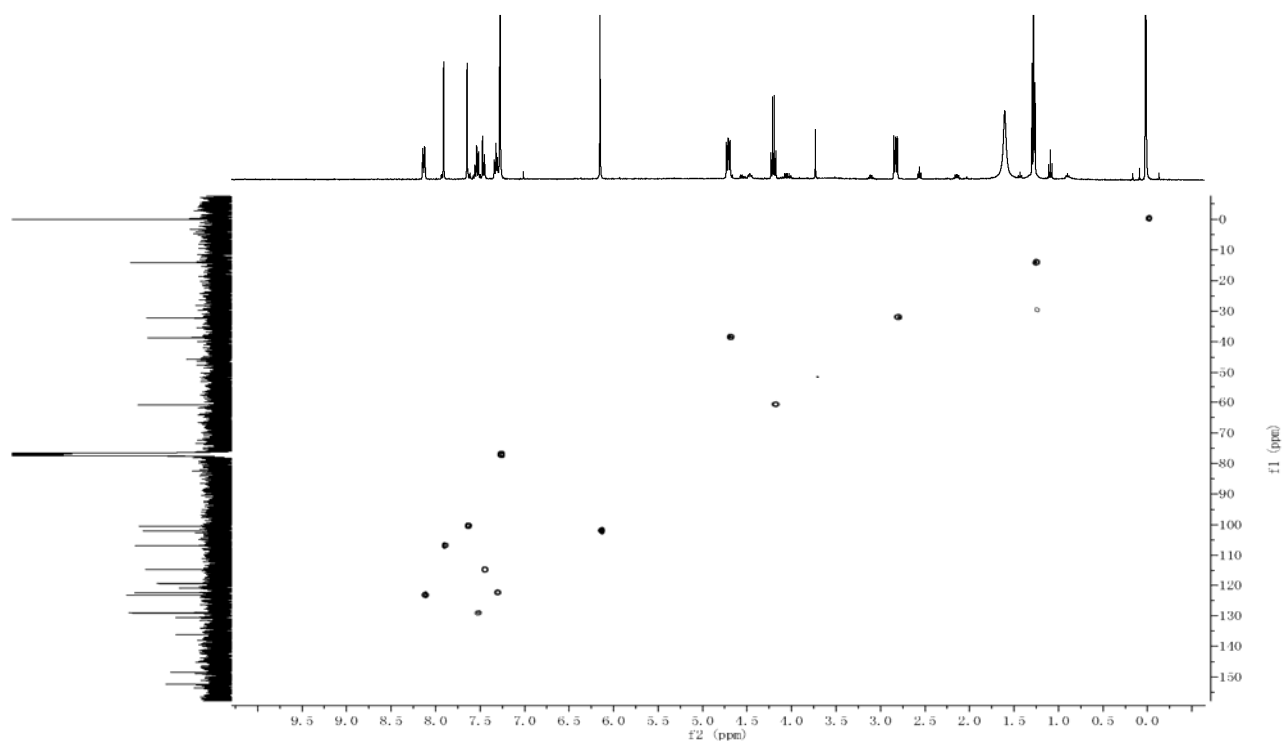

Figure S31. HMBC spectrum of **7** in CDCl<sub>3</sub>D

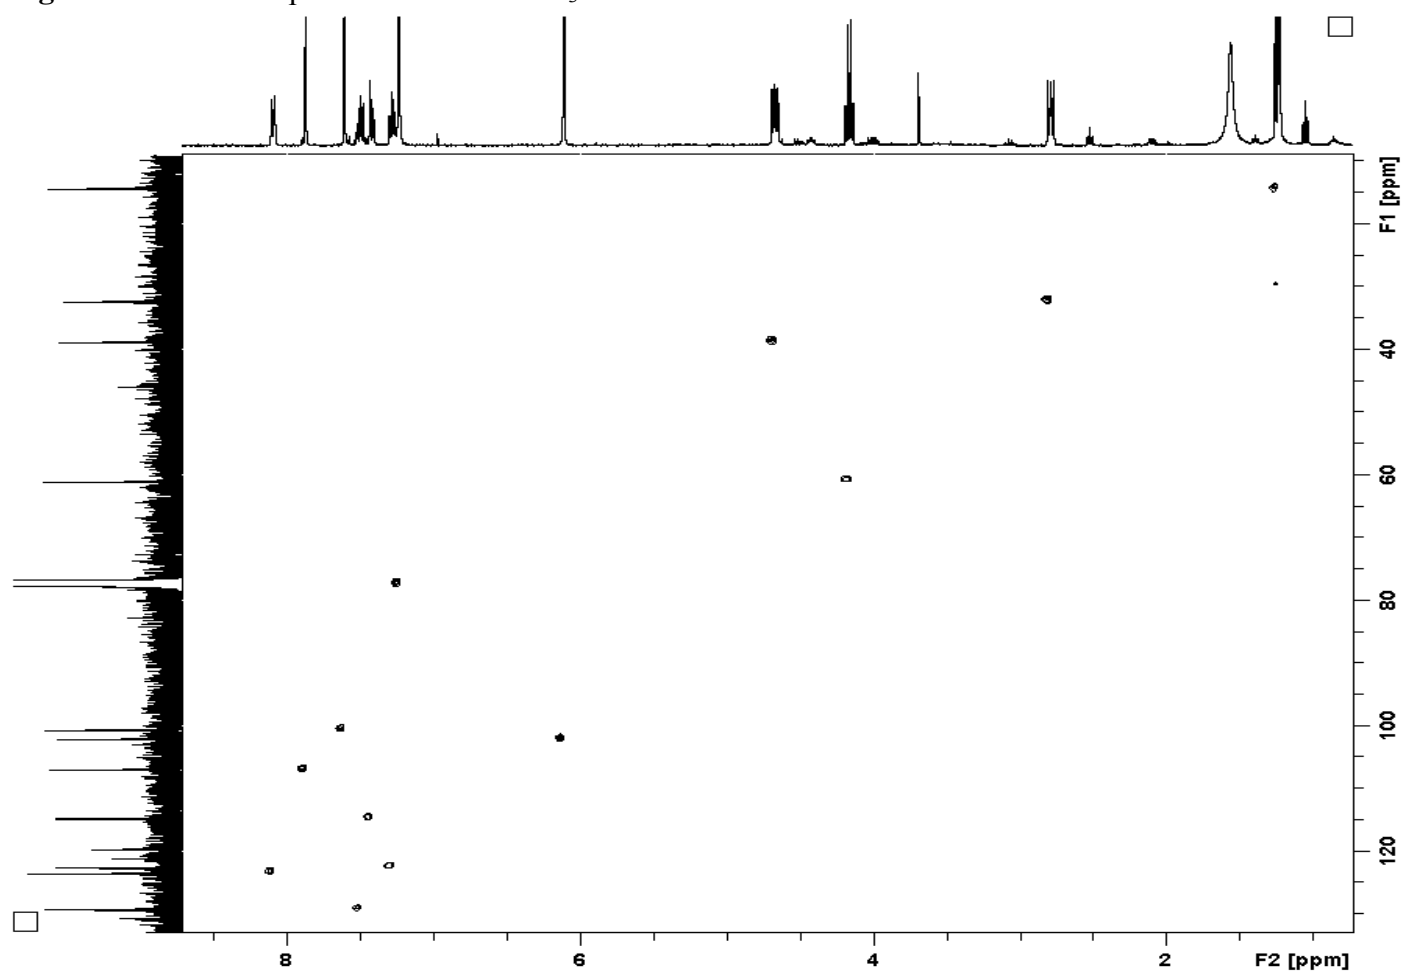

Figure S32.  $^1\text{H}$ - $^1\text{H}$  COSY spectrum of 7 in  $\text{CDCl}_3$

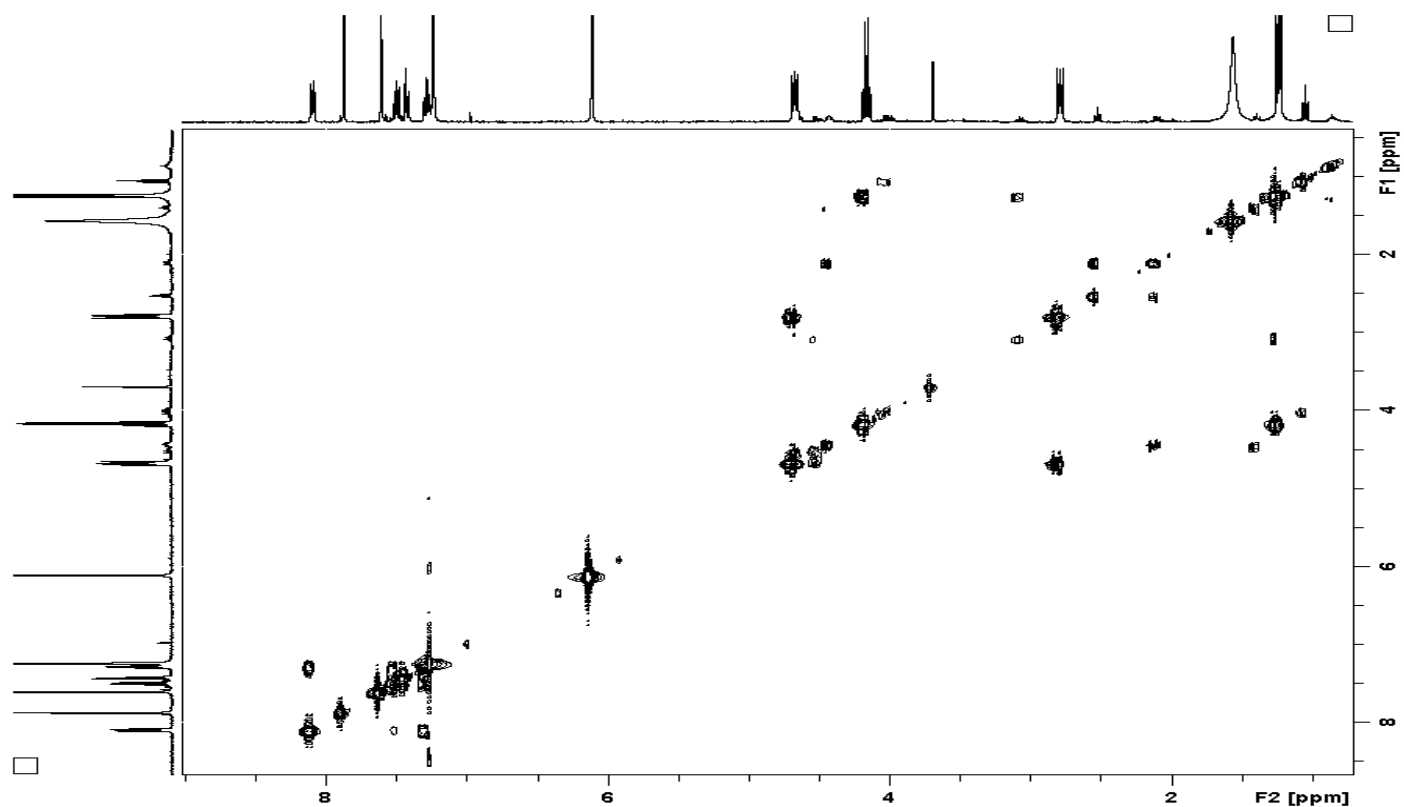

Figure S33. (+)-HR-ESI-MS spectrum of 8

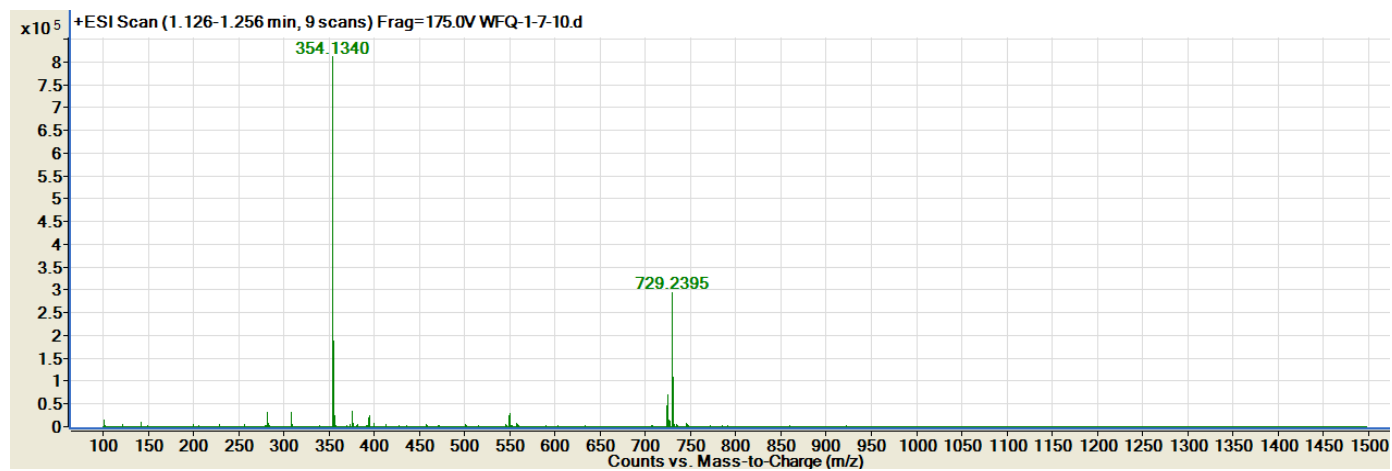

Figure S34.  $^1\text{H}$  NMR spectrum (400 MHz) of **8** in  $\text{CDCl}_3$

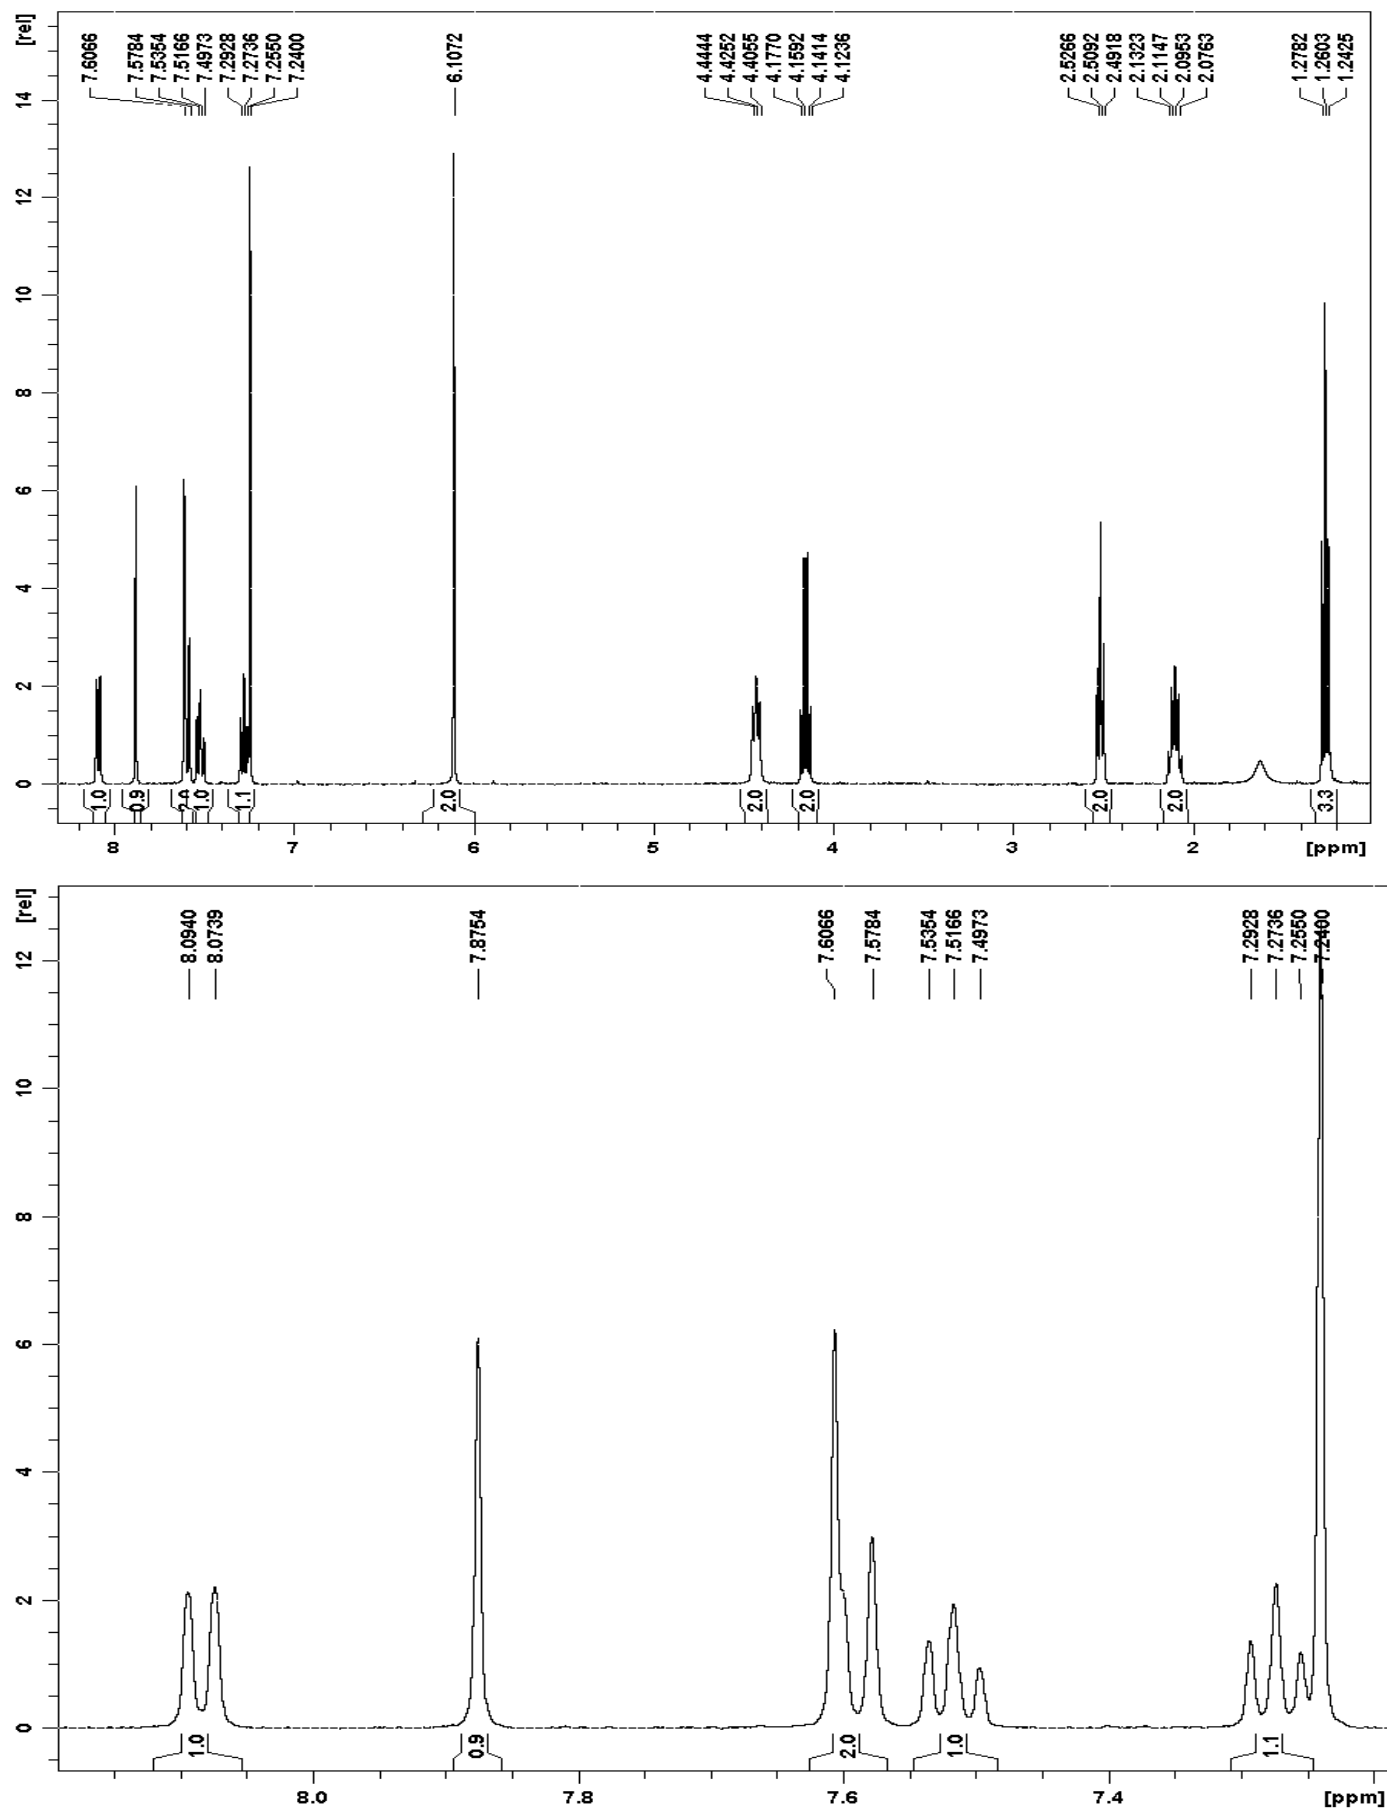

Figure S35.  $^{13}\text{C}$  NMR spectrum (100 MHz) of **8** in  $\text{CDCl}_3$

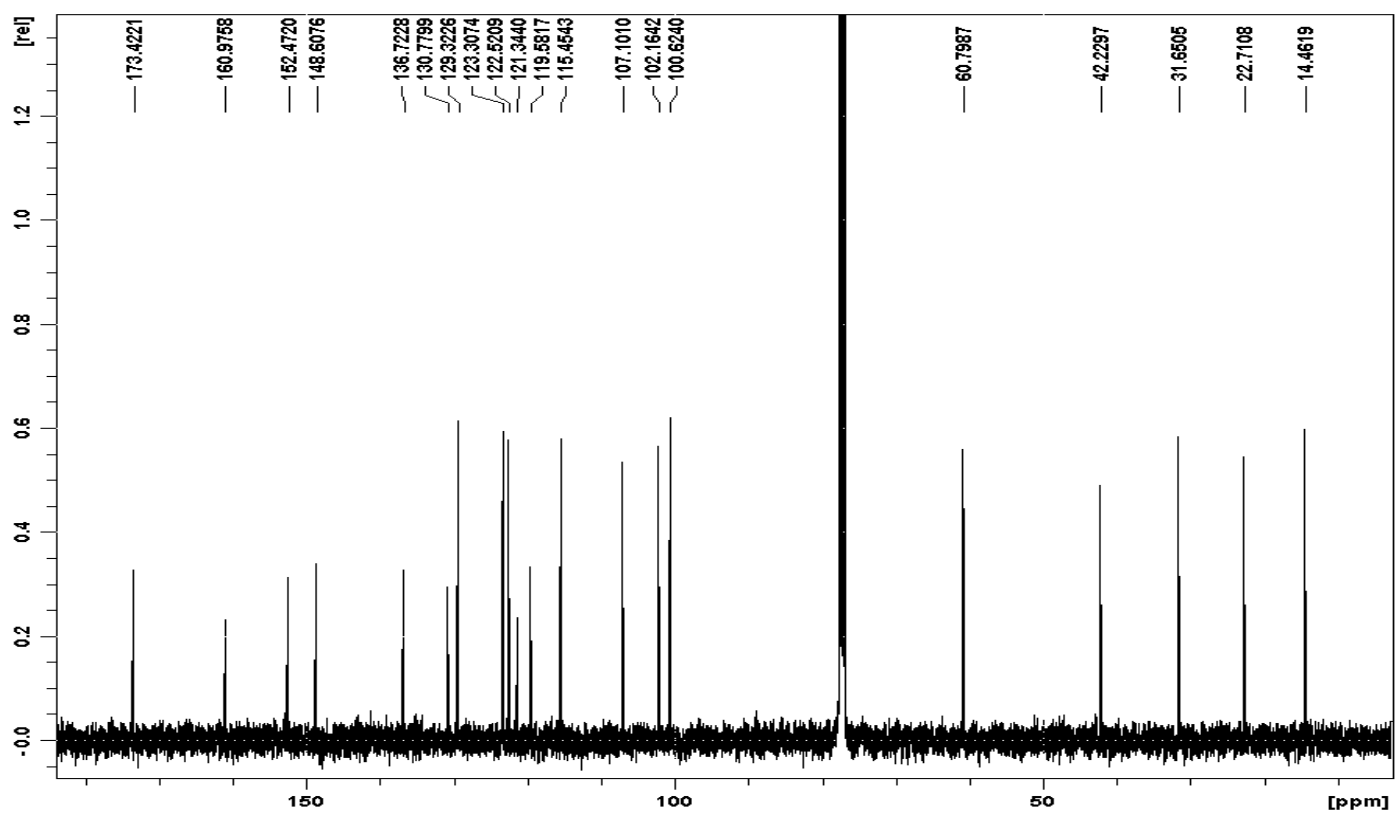

Figure S36. DEPT 135 spectrum of **8** in  $\text{CDCl}_3$

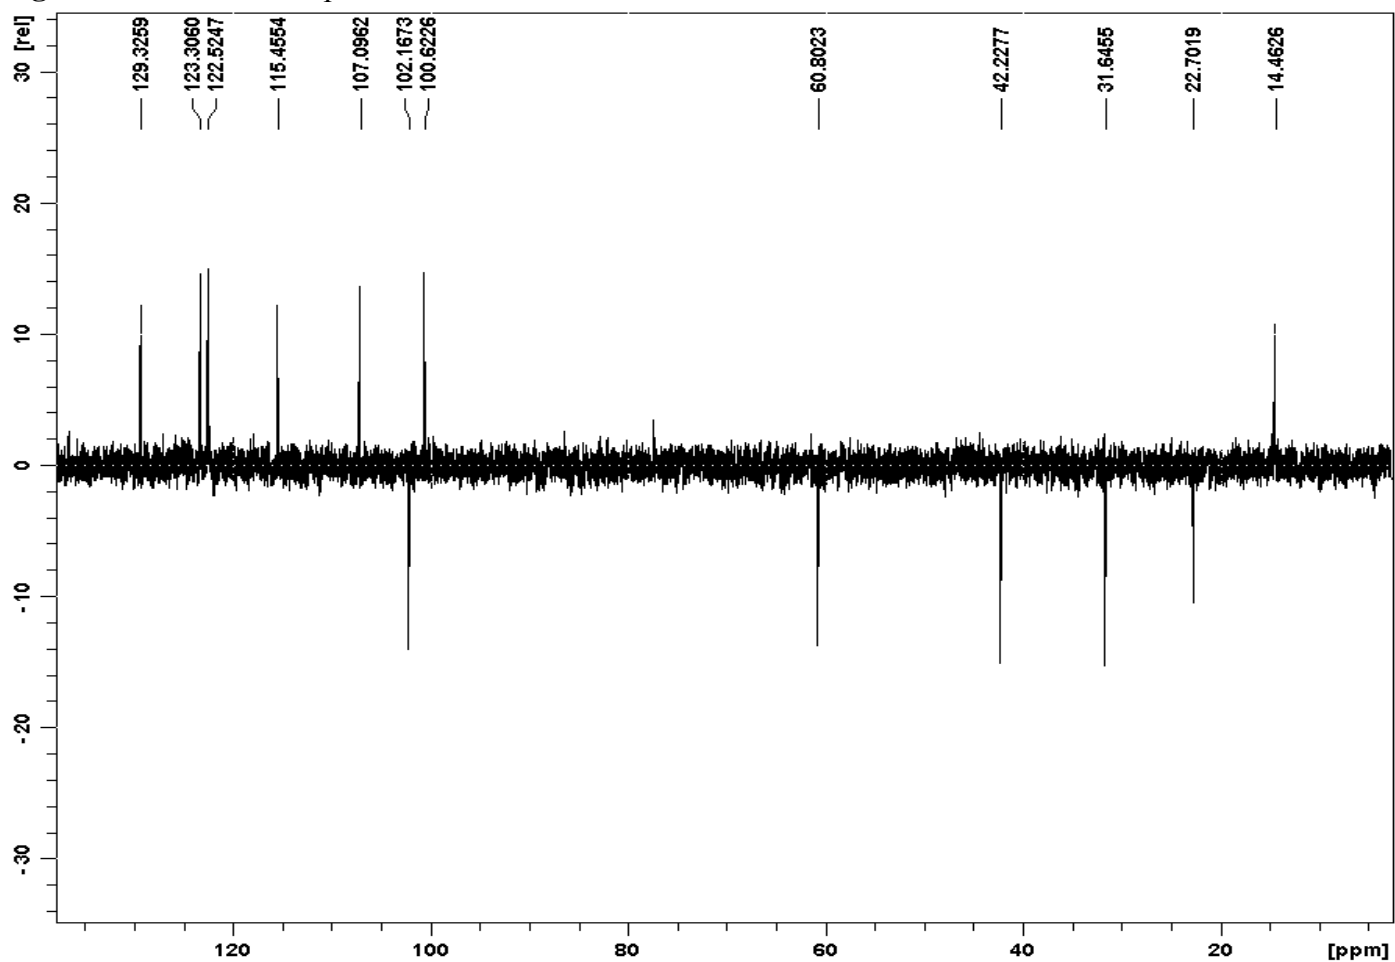

Figure S37. HSQC spectrum of **8** in CDCl<sub>3</sub>

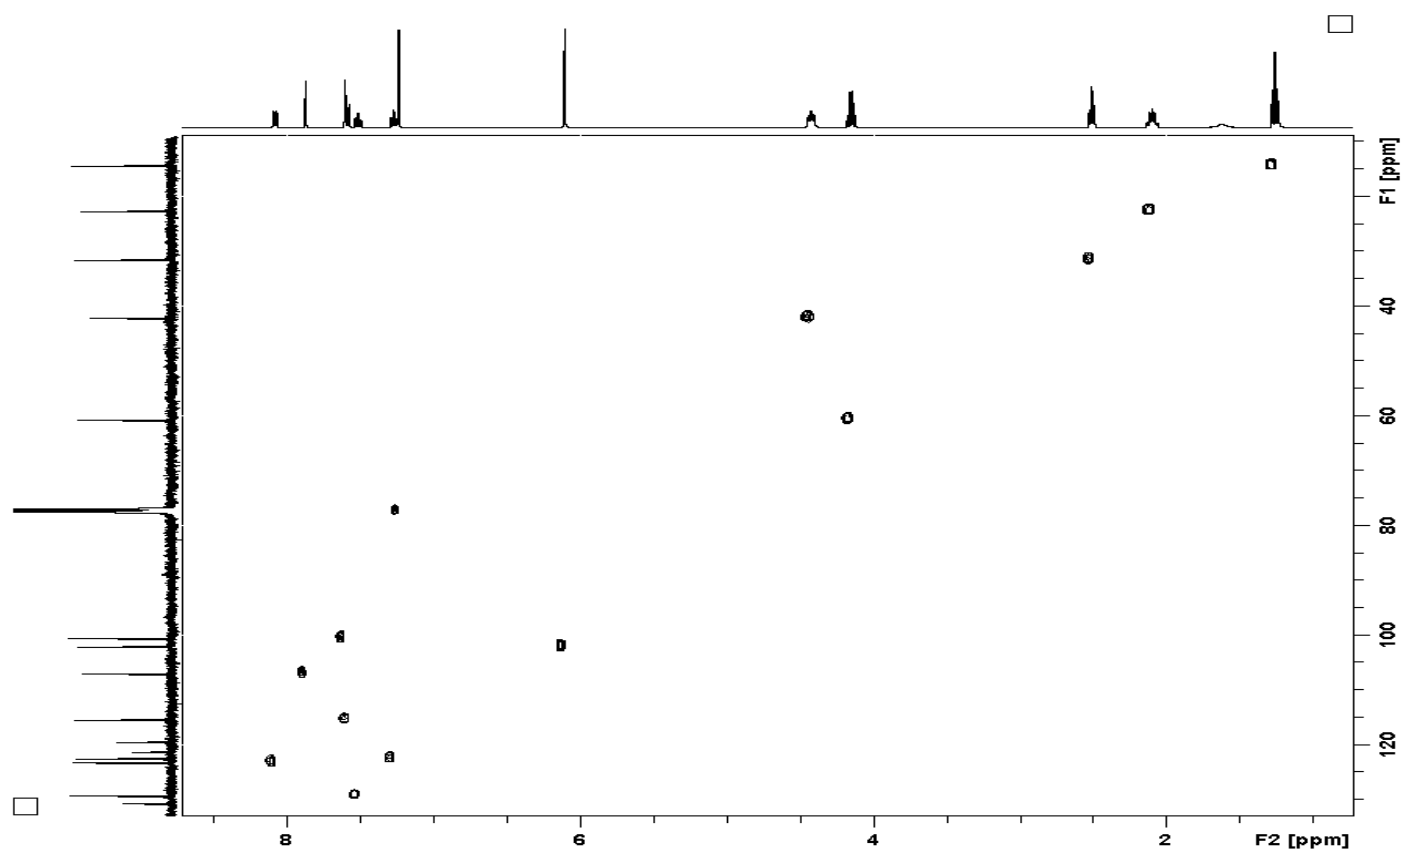

Figure S38. HMBC spectrum of **8** in CDCl<sub>3</sub>

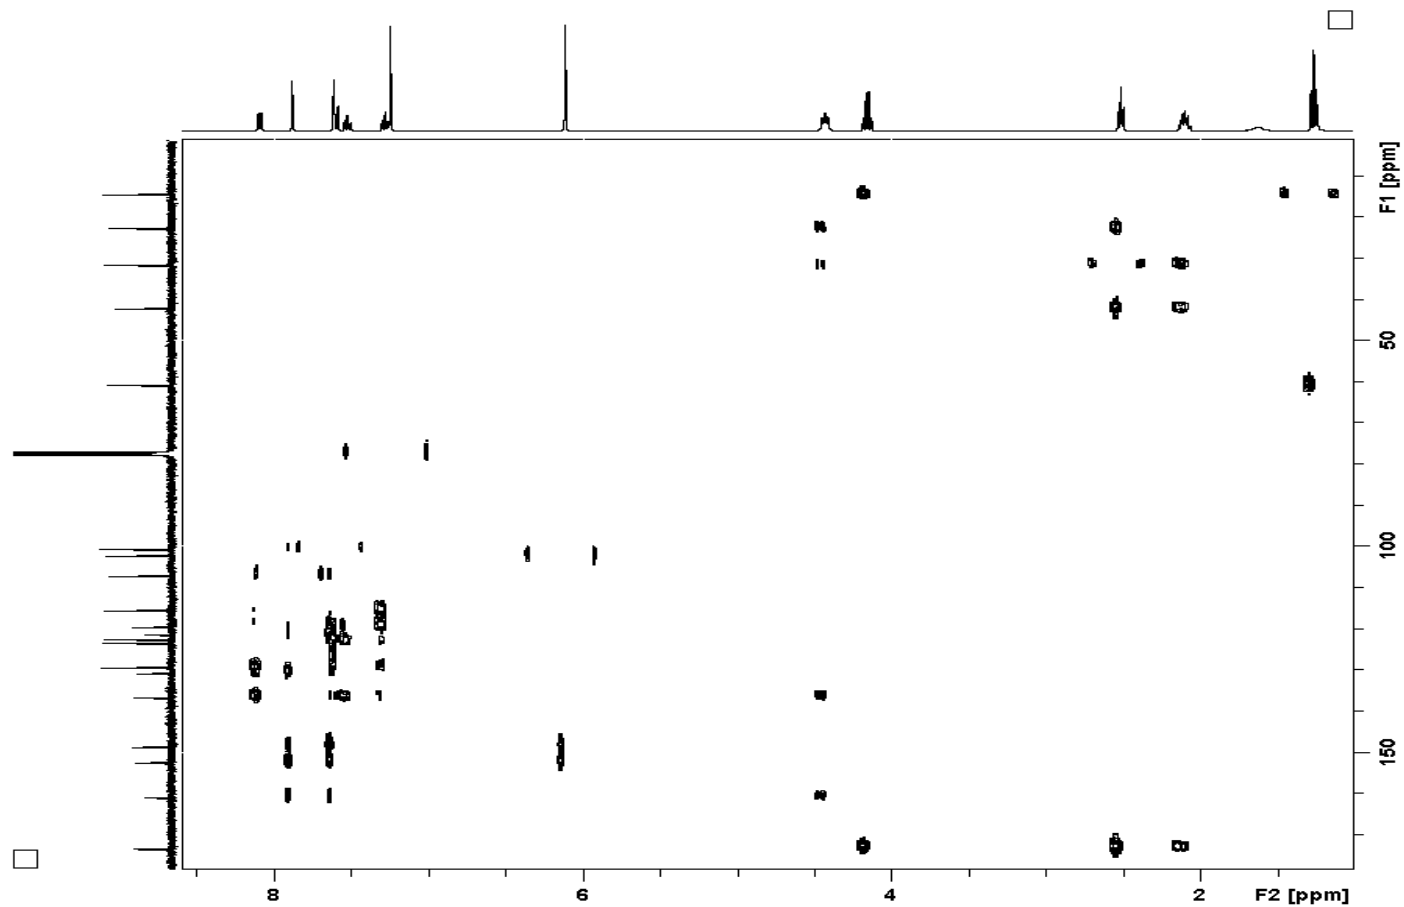



**Figure S39.**  $^1\text{H}$ - $^1\text{H}$  COSY spectrum of **8** in  $\text{CDCl}_3$

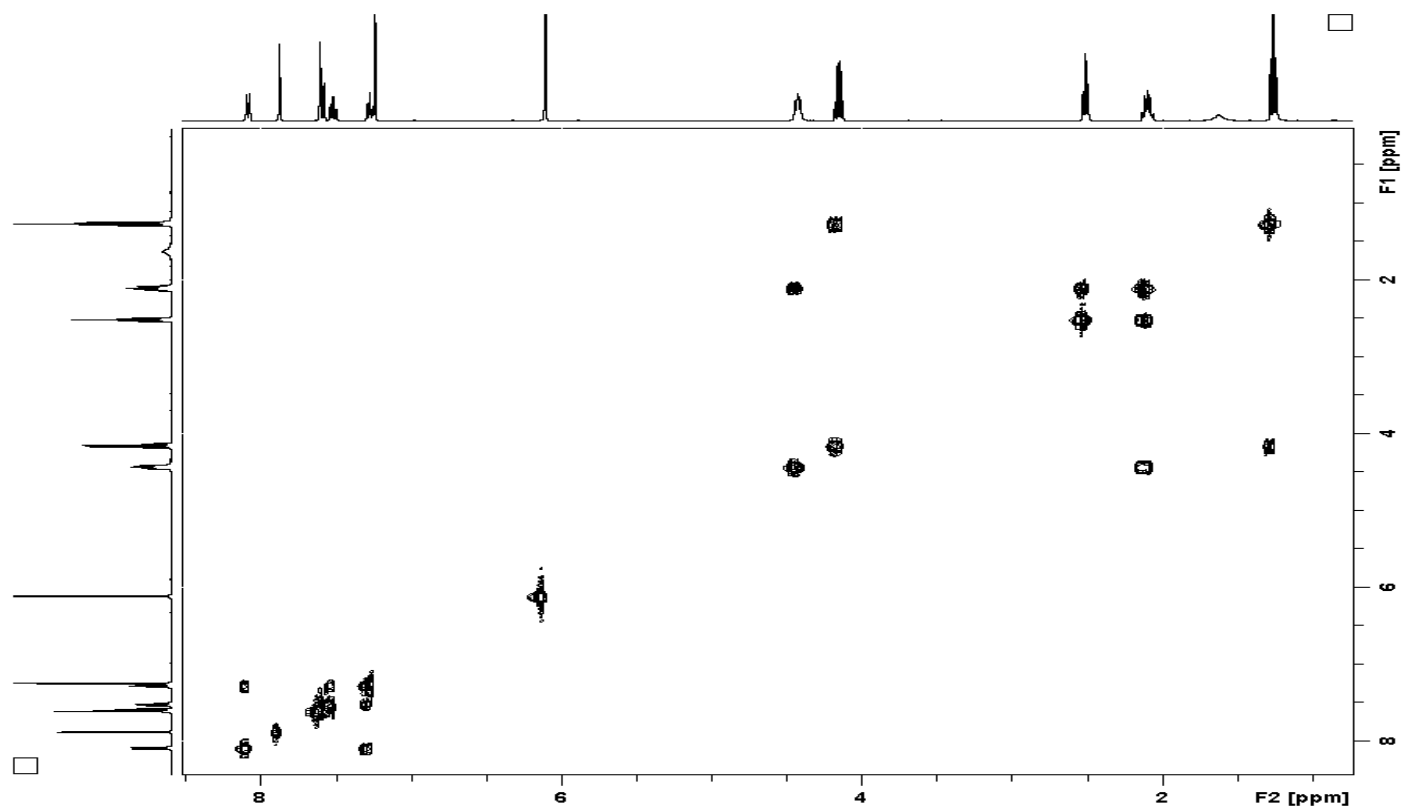

**Figure S40.** (+)-HR-ESI-MS spectrum of **9**

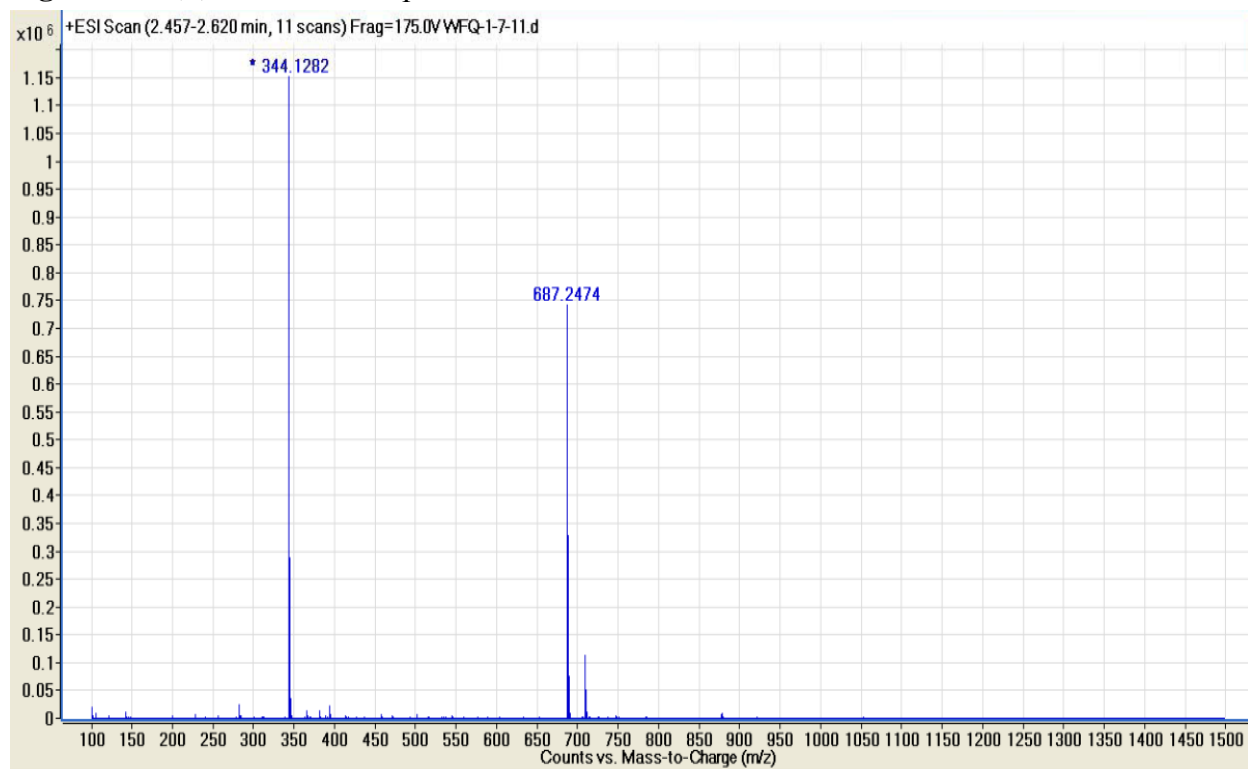

Figure S41. <sup>1</sup>H NMR spectrum (400 MHz) of **9** in CDCl<sub>3</sub>

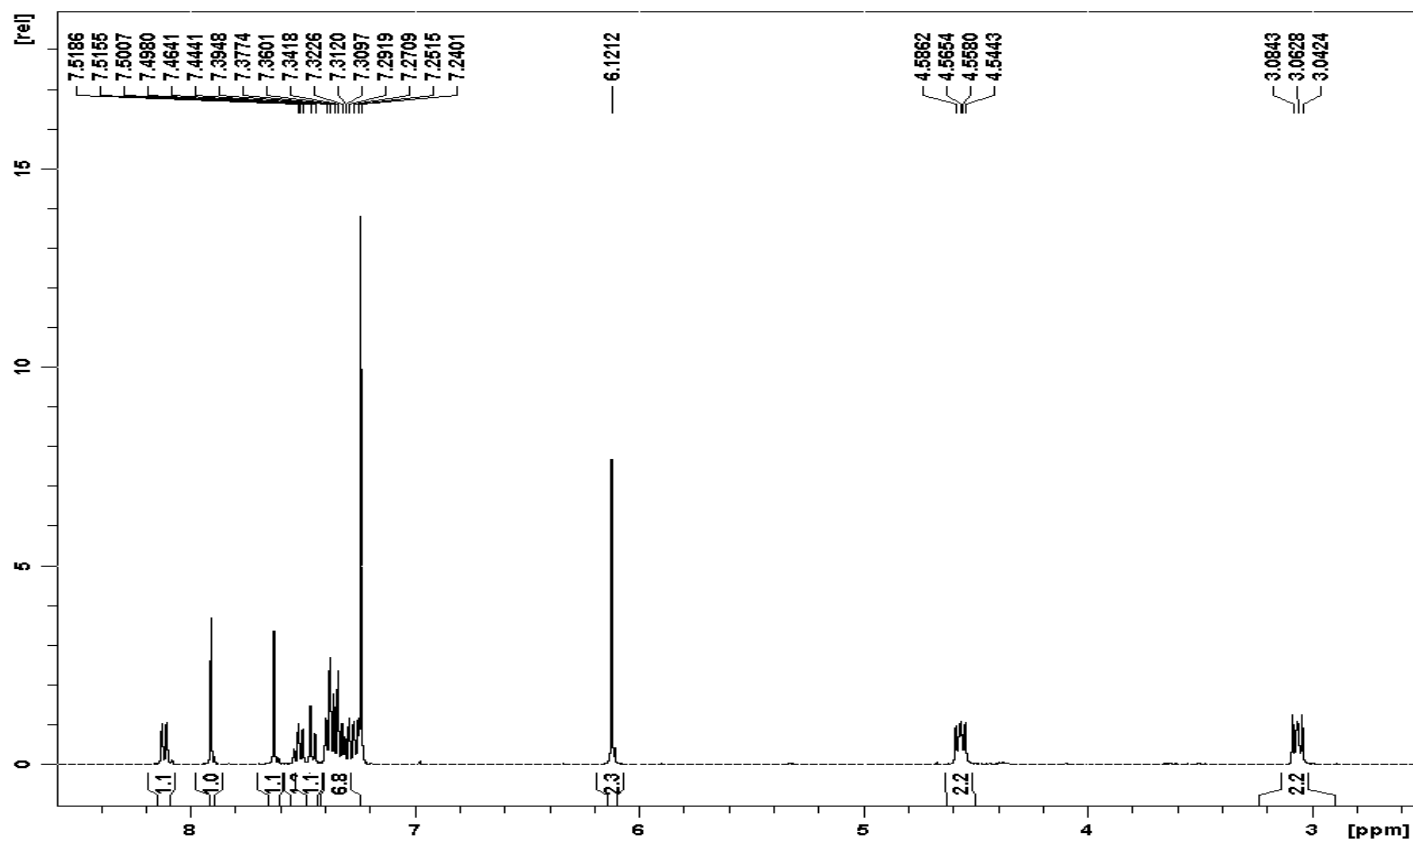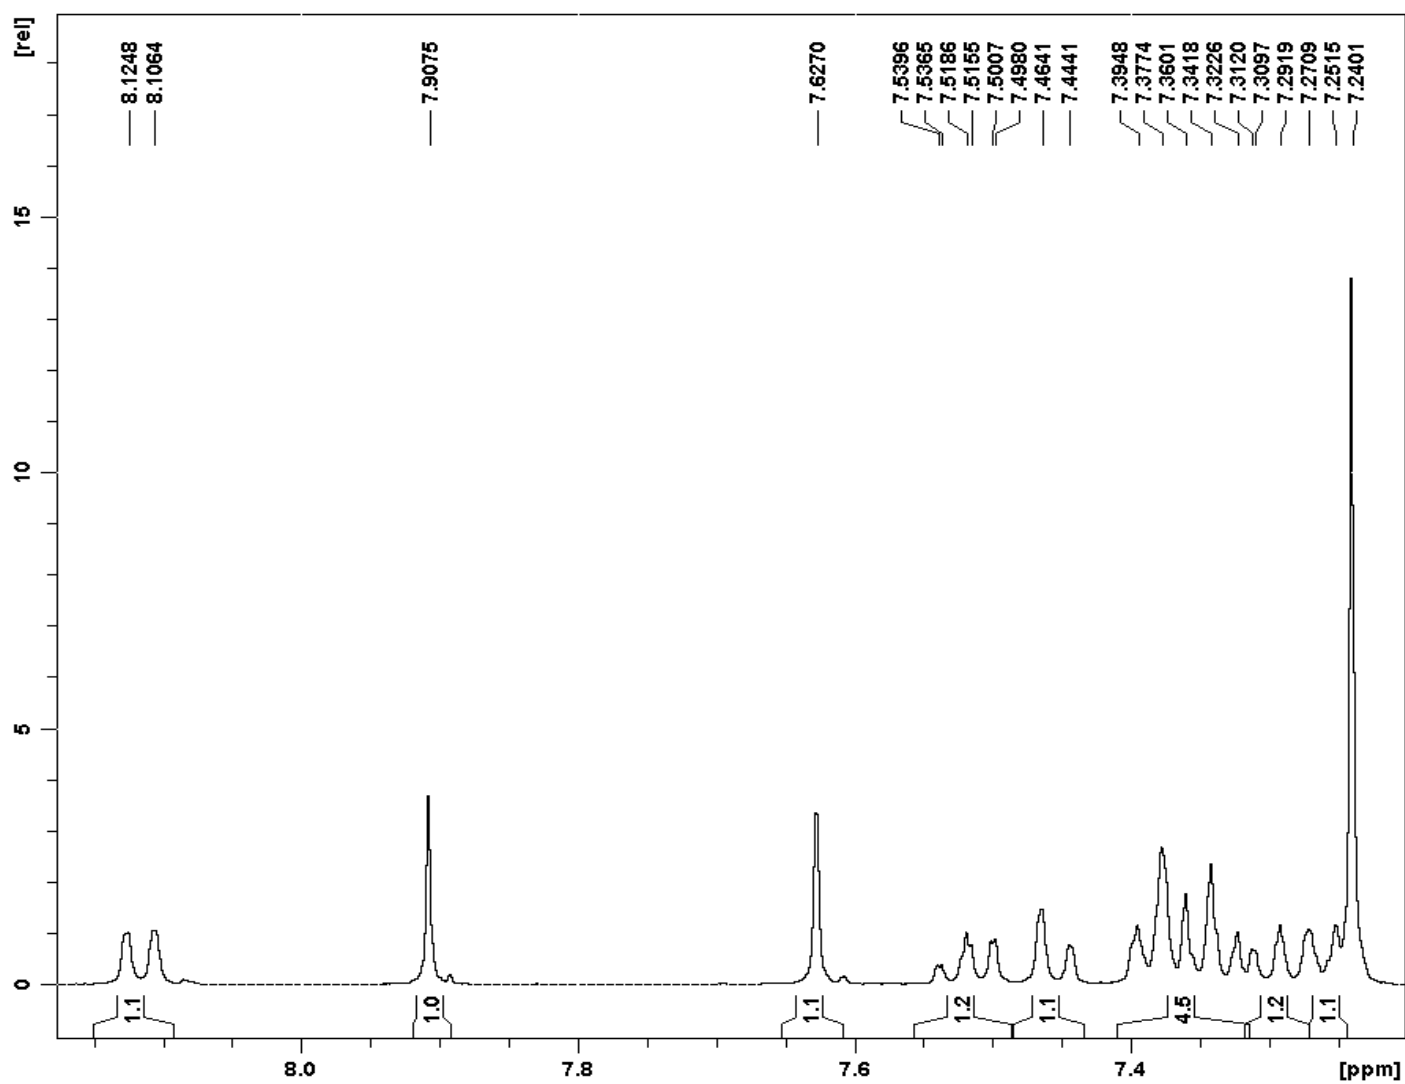

Figure S42.  $^{13}\text{C}$  NMR spectrum (100 MHz) of **9** in  $\text{CDCl}_3$

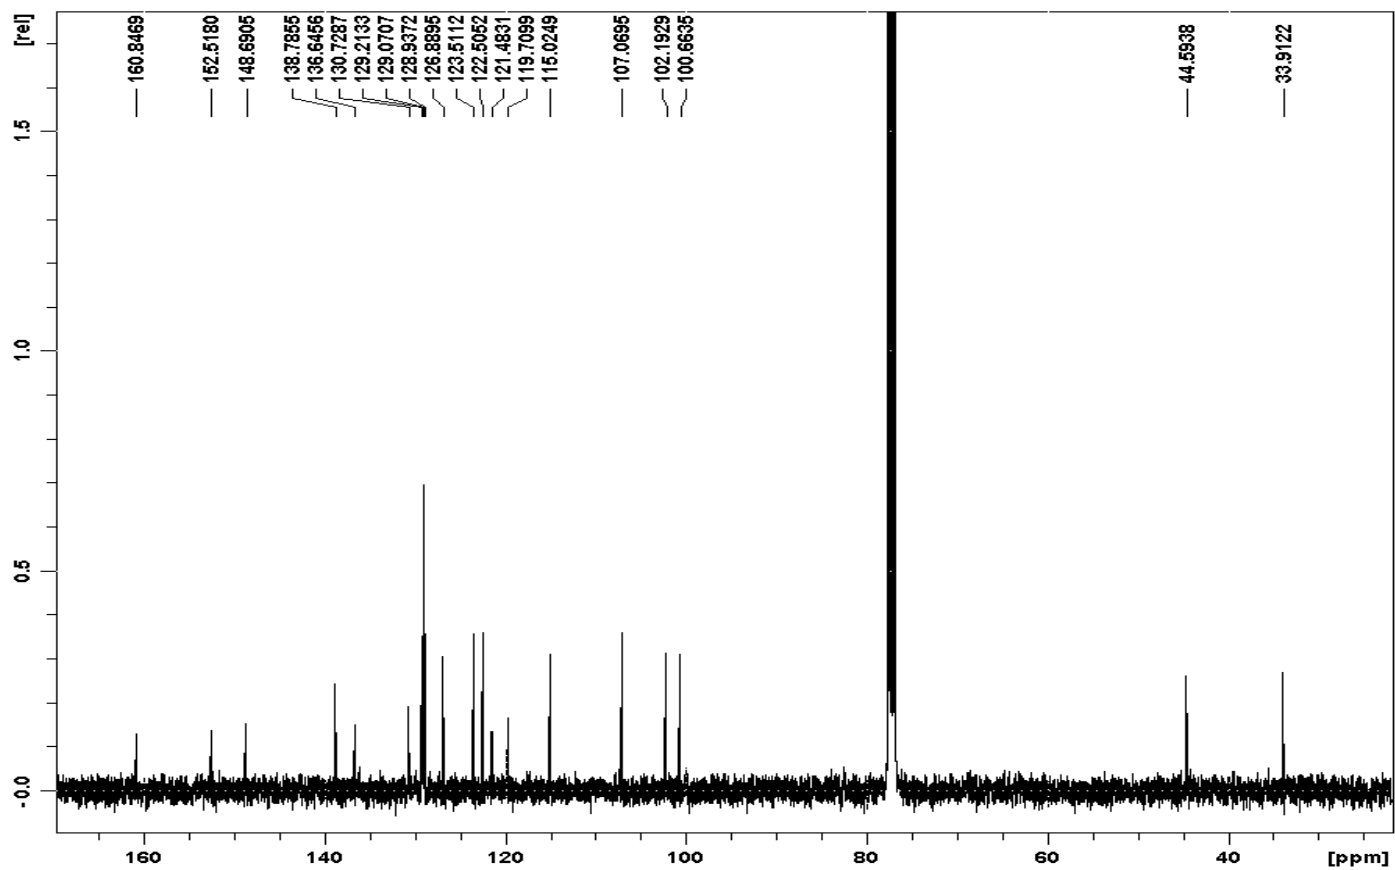

Figure S43. DEPT 135 spectrum of **9** in  $\text{CDCl}_3$

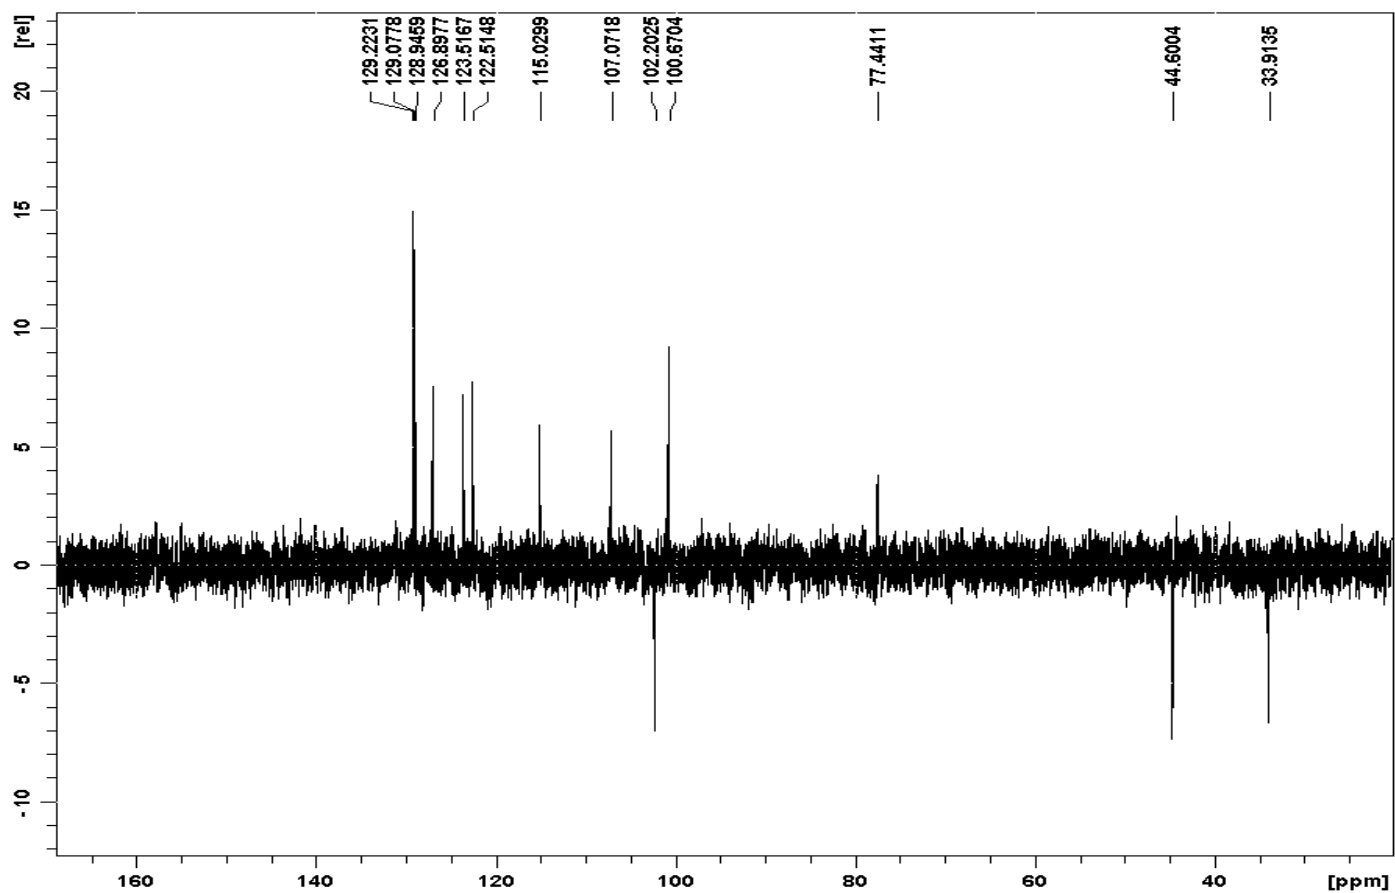

Figure S44. HSQC spectrum of **9** in CDCl<sub>3</sub>

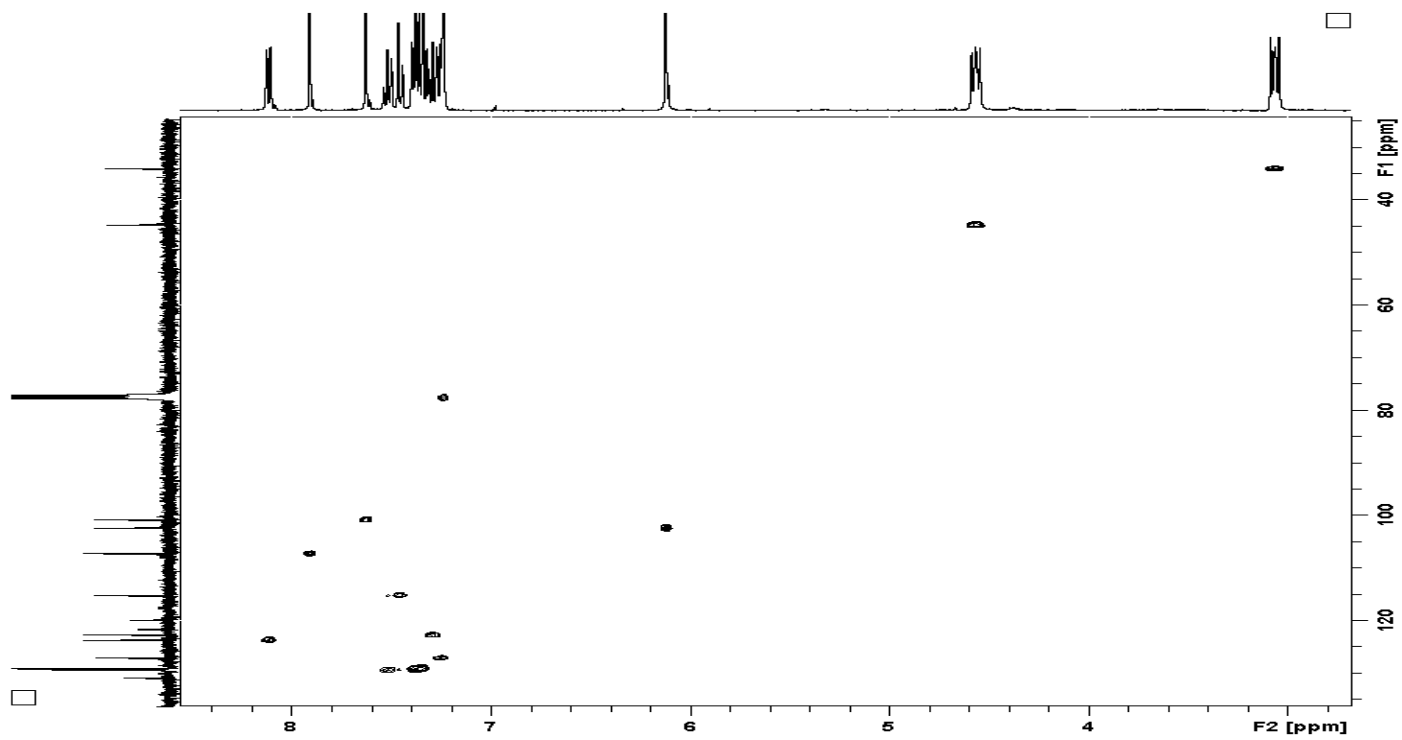

Figure S45. HMBC spectrum of **9** in CDCl<sub>3</sub>

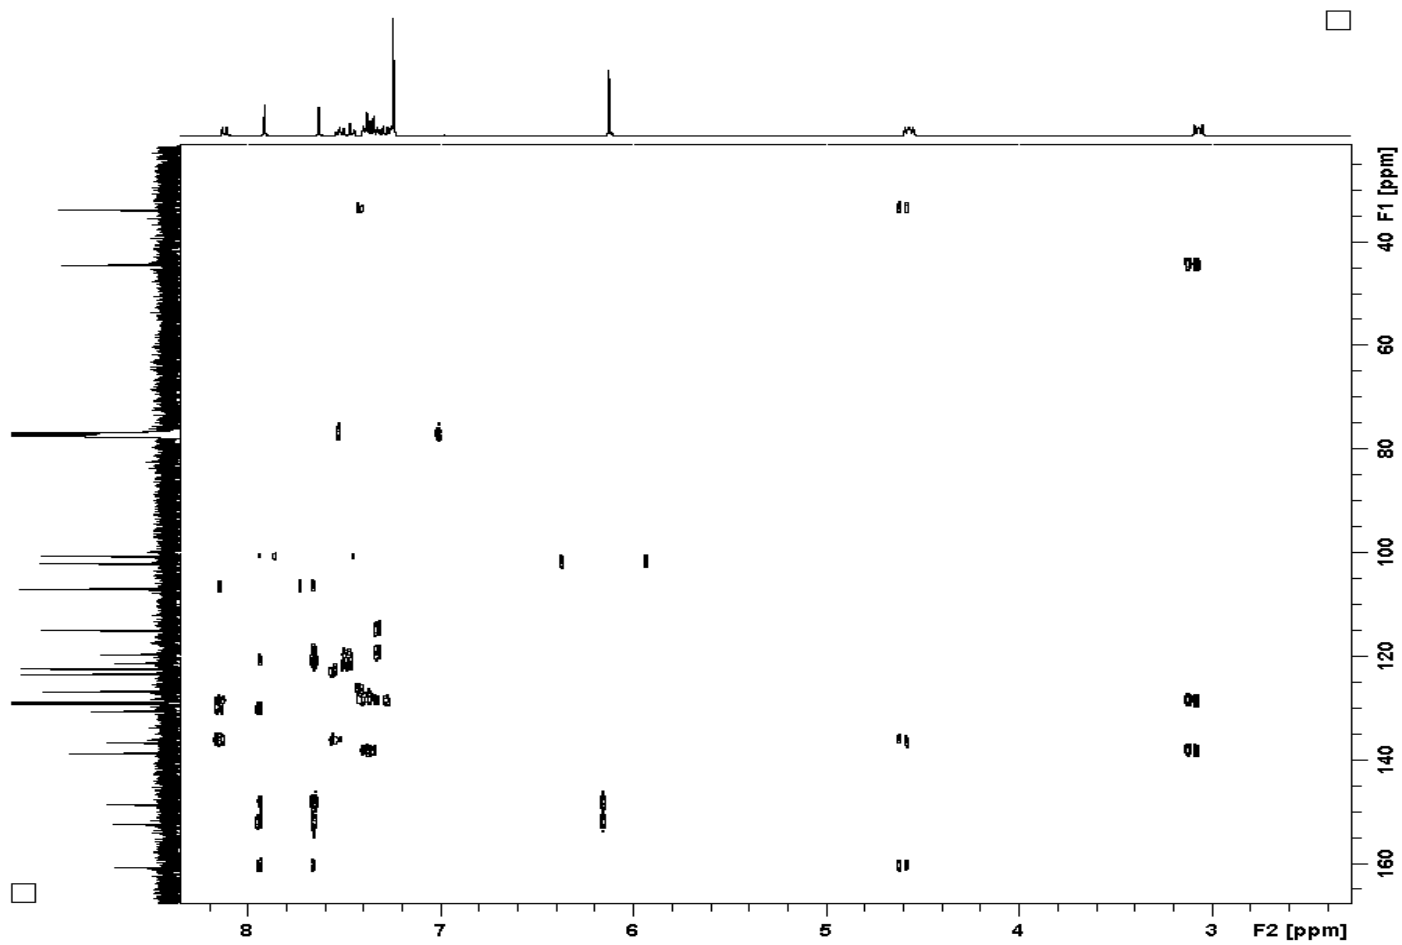

Figure S46.  $^1\text{H}$ - $^1\text{H}$  COSY spectrum of **9** in  $\text{CDCl}_3$

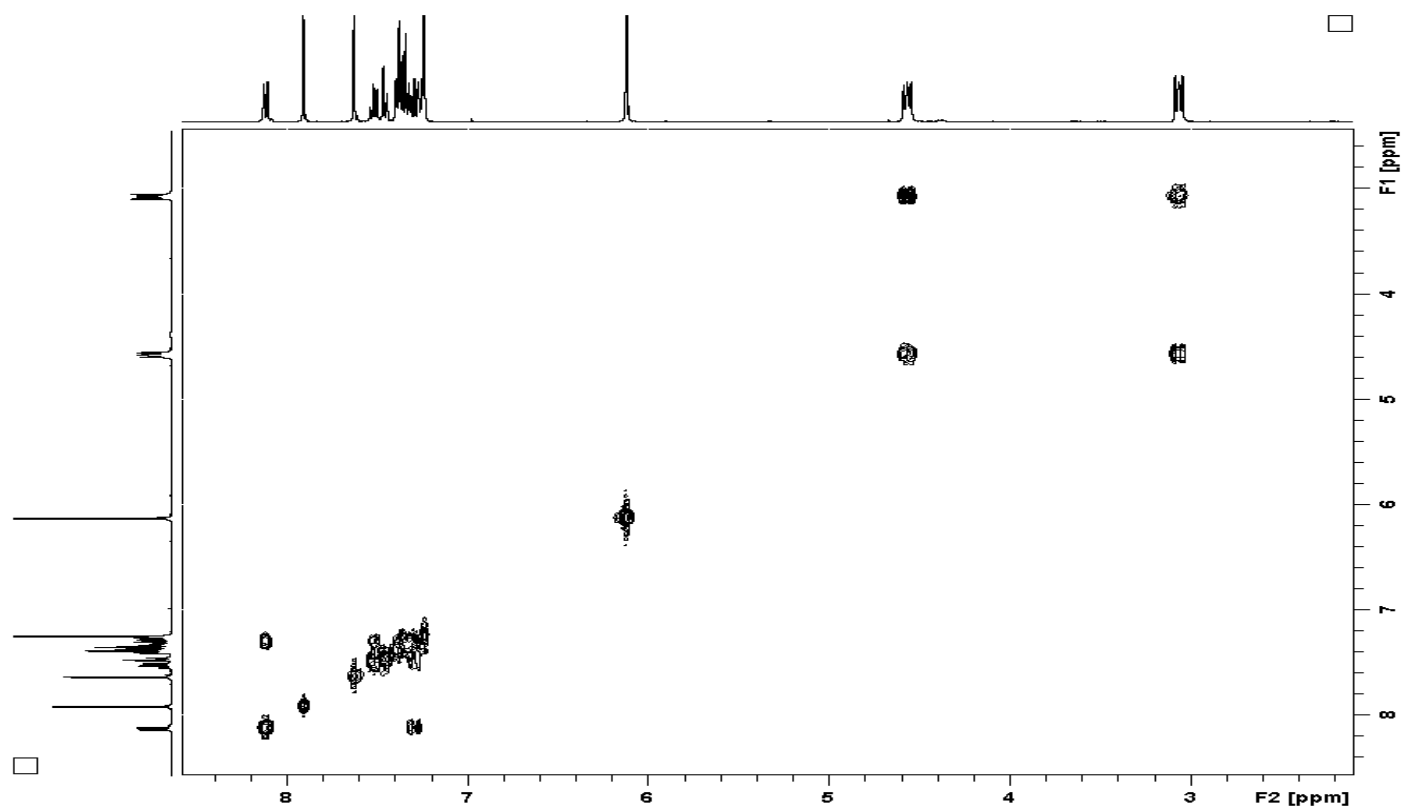

Figure S47. (+)-HR-ESI-MS spectrum of **10**

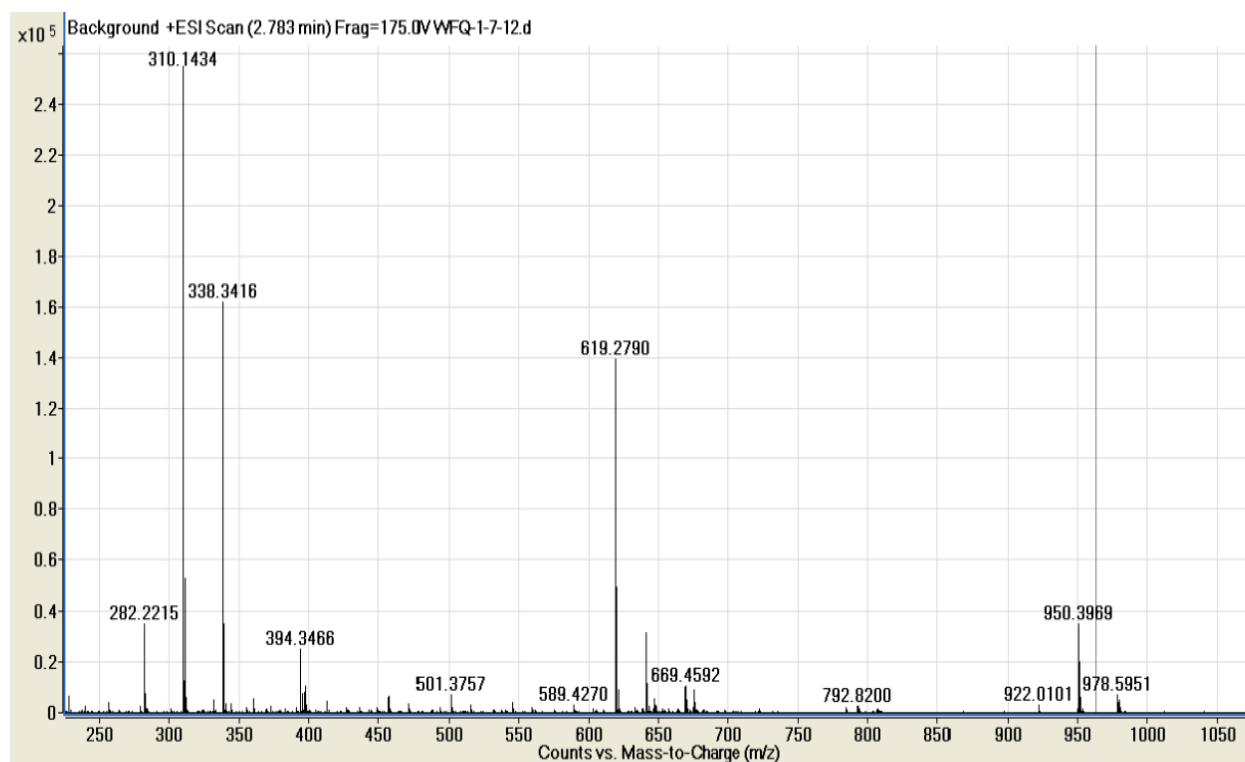

Figure S48.  $^1\text{H}$  NMR spectrum (400 MHz) of **10** in  $\text{CDCl}_3$

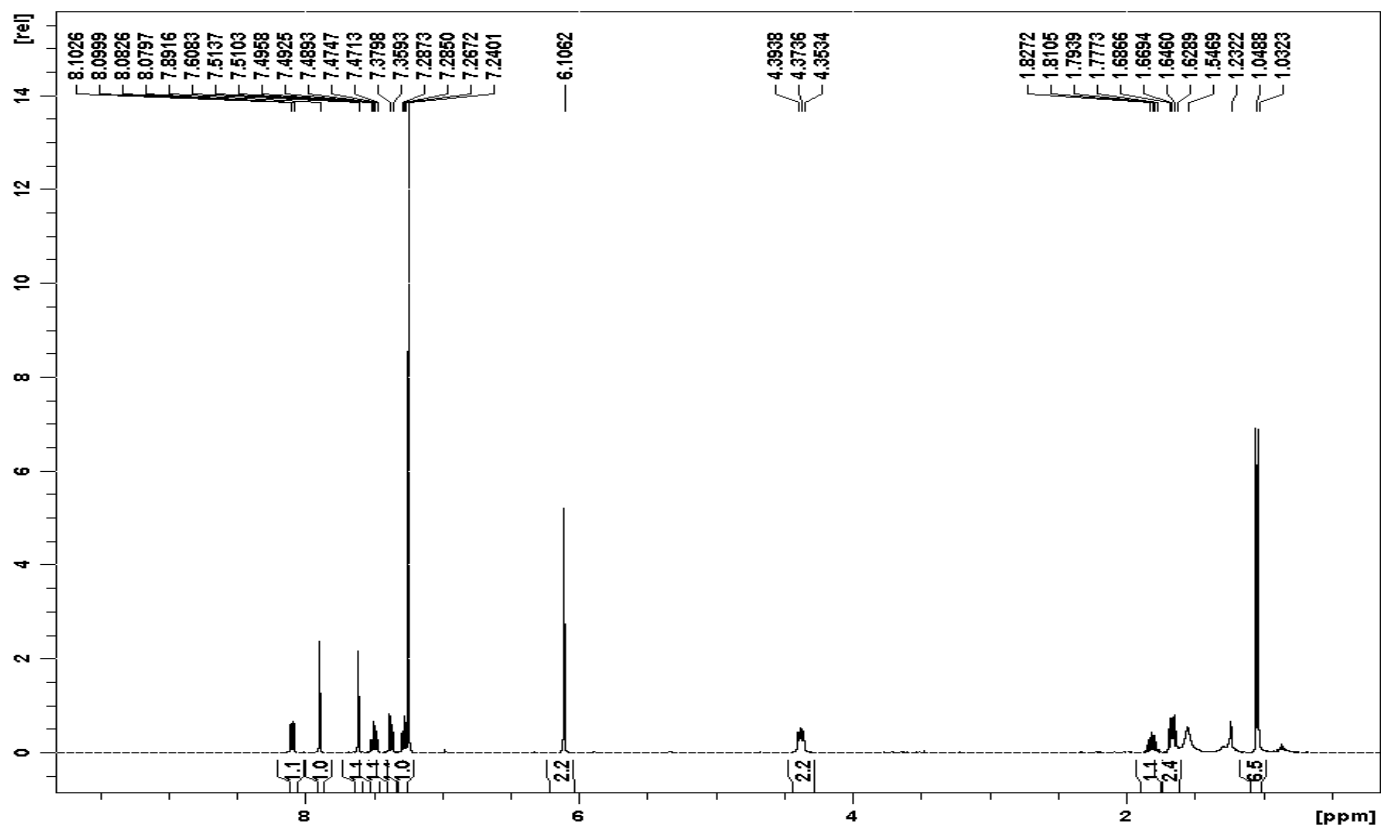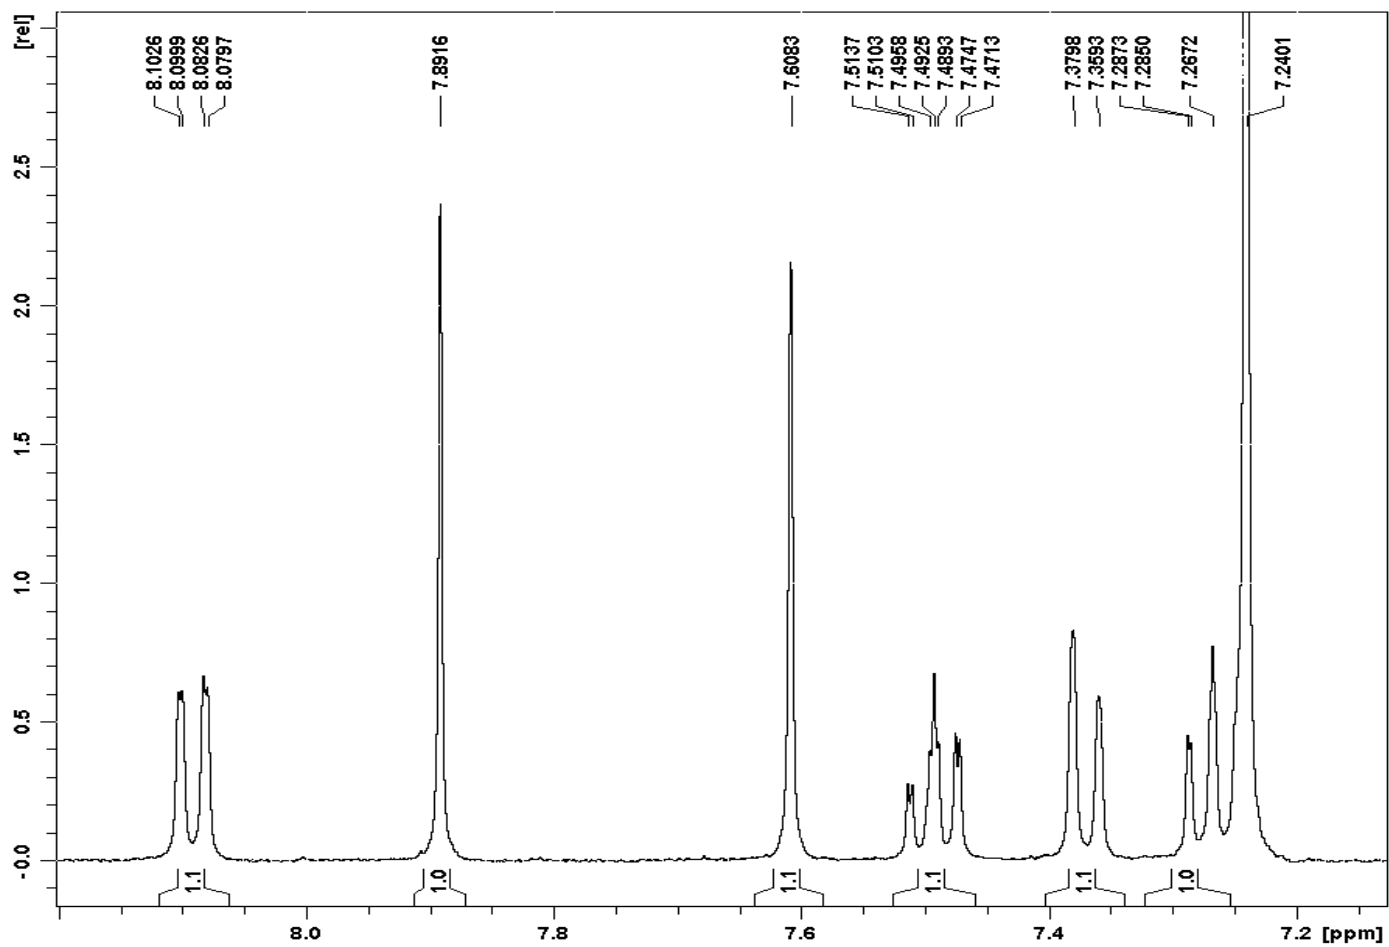

Figure S49.  $^{13}\text{C}$  NMR spectrum (100 MHz) of **10** in  $\text{CDCl}_3$

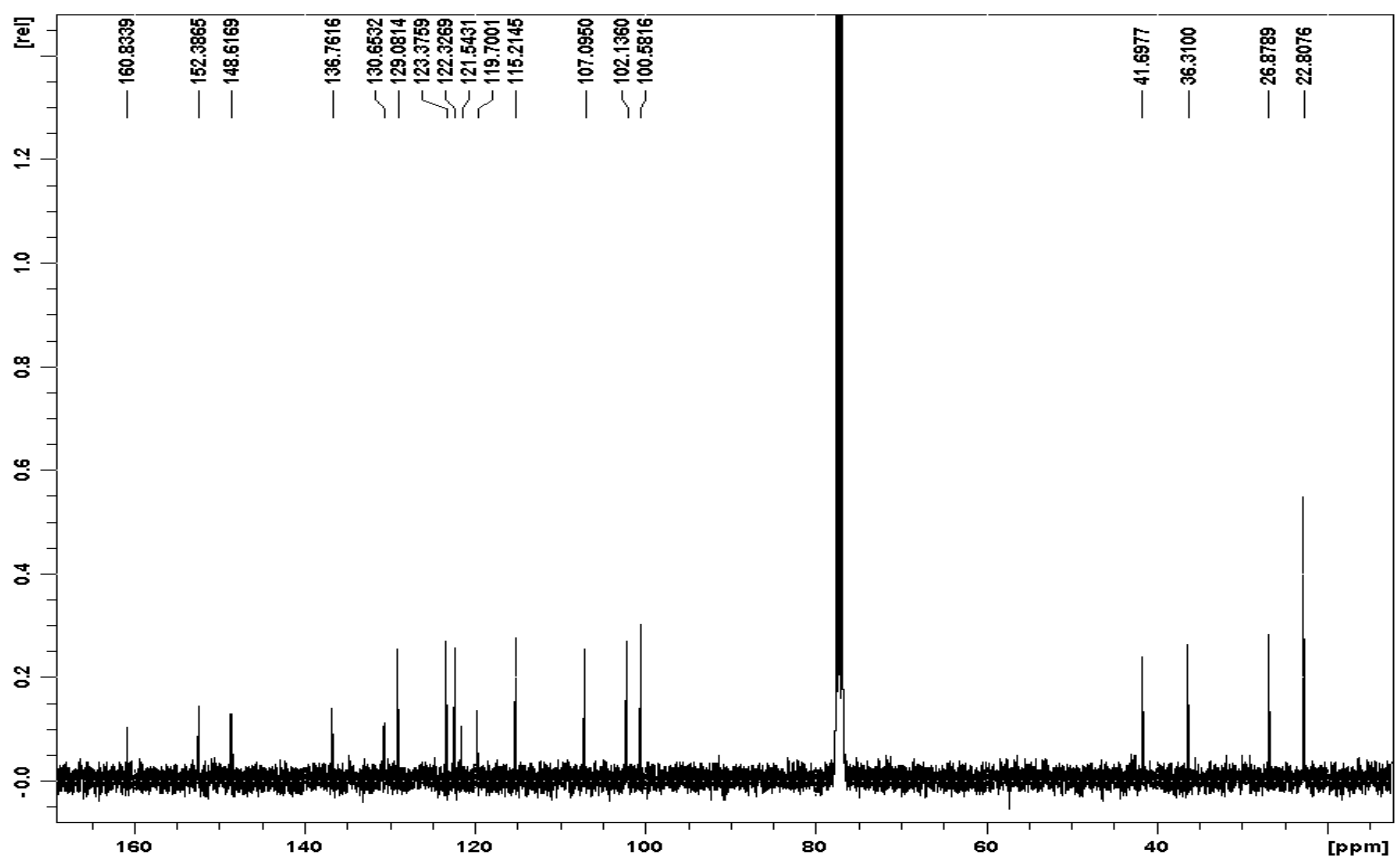

Figure S50. DEPT 135 spectrum of **10** in  $\text{CDCl}_3$

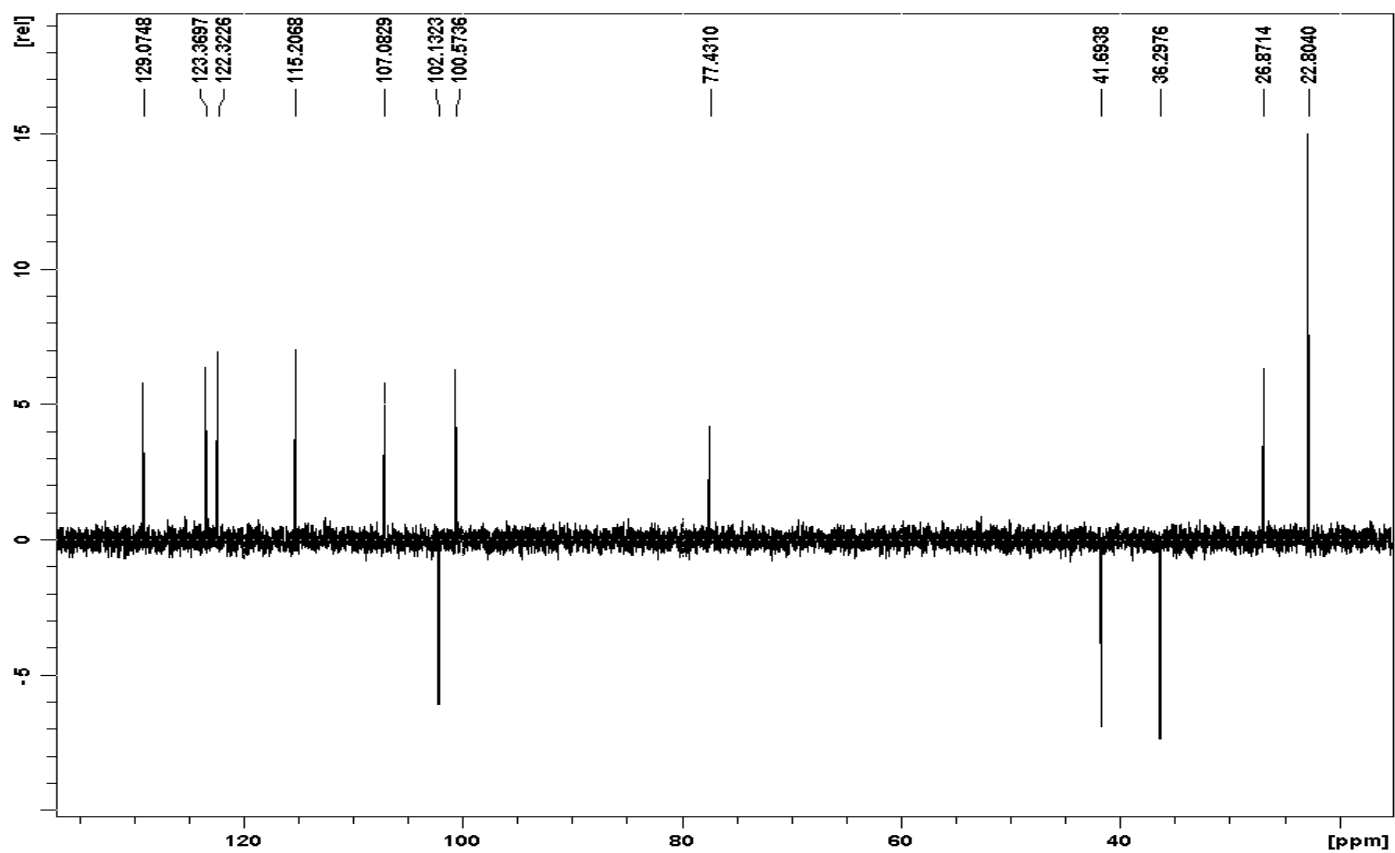

Figure S51. HSQC spectrum of **10** in CDCl<sub>3</sub>

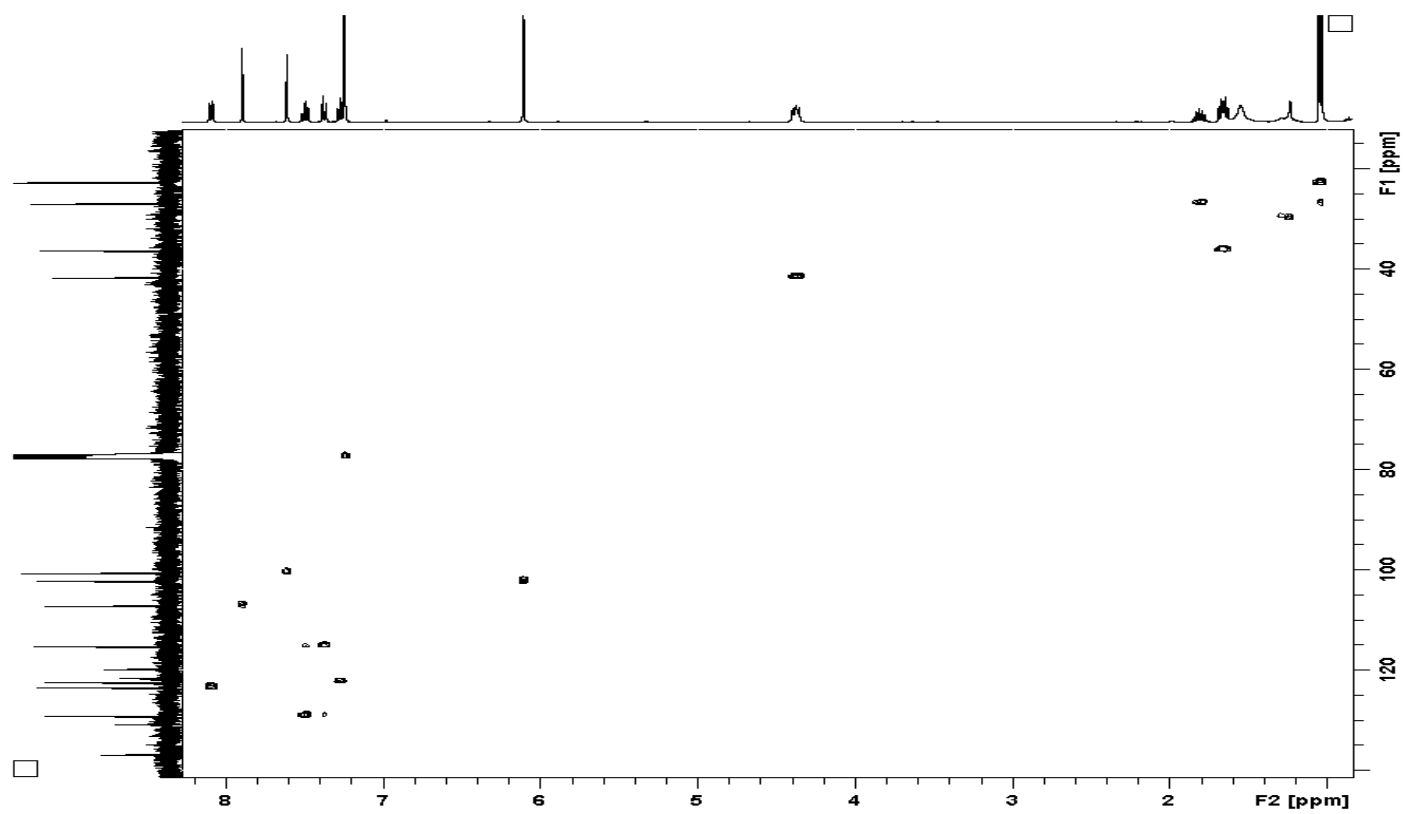

Figure S52. HMBC spectrum of **10** in CDCl<sub>3</sub>

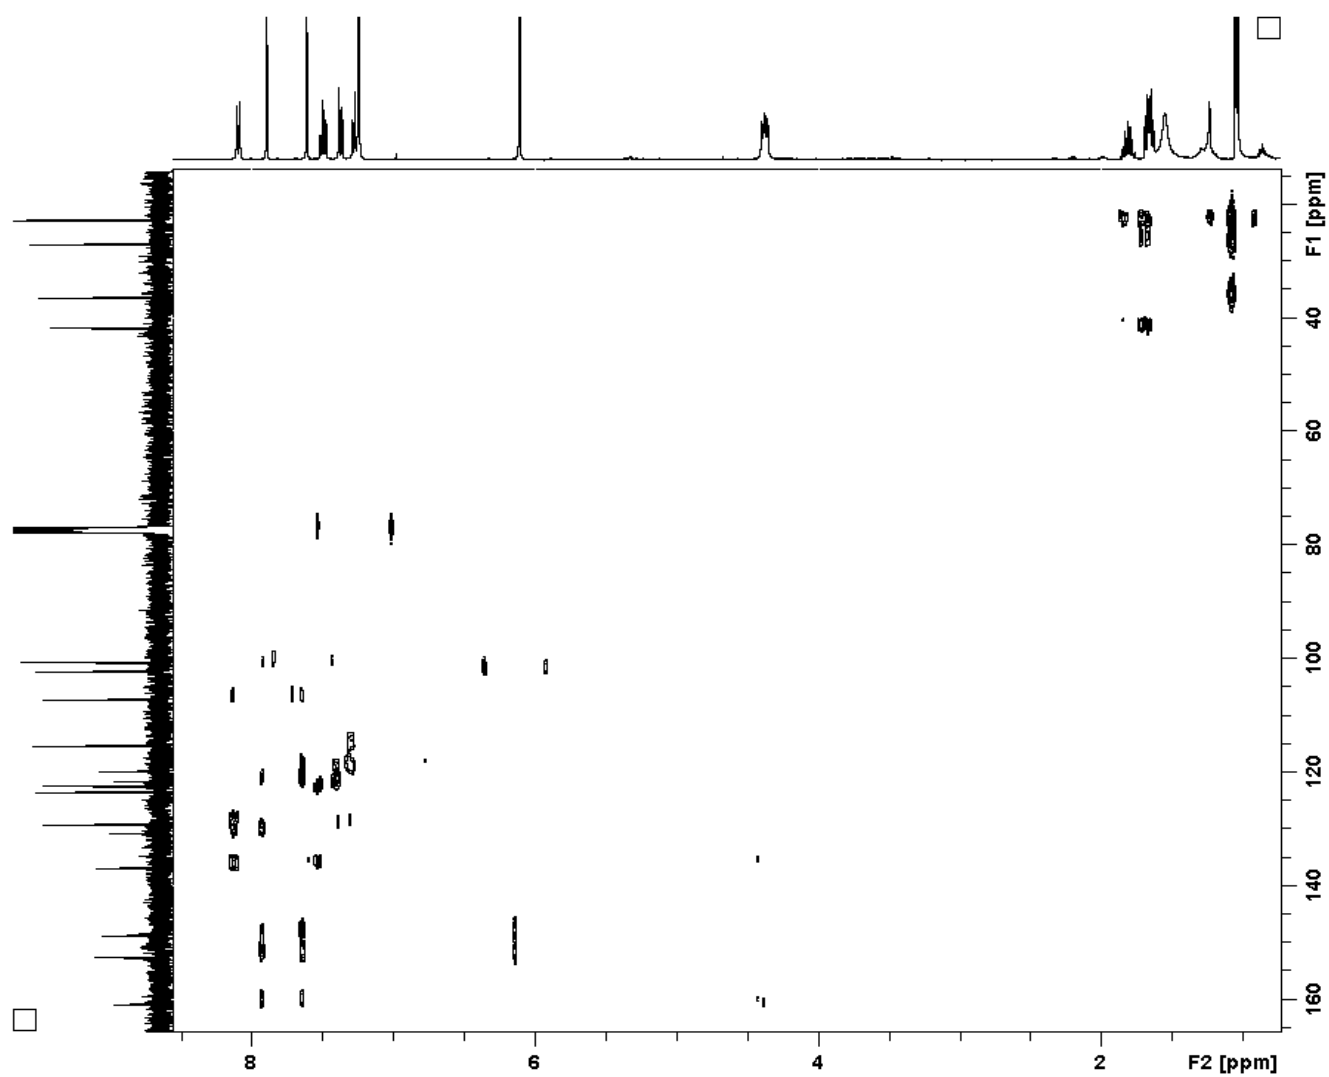



**Figure S53.**  $^1\text{H}$ - $^1\text{H}$  COSY spectrum of **10** in  $\text{CDCl}_3$

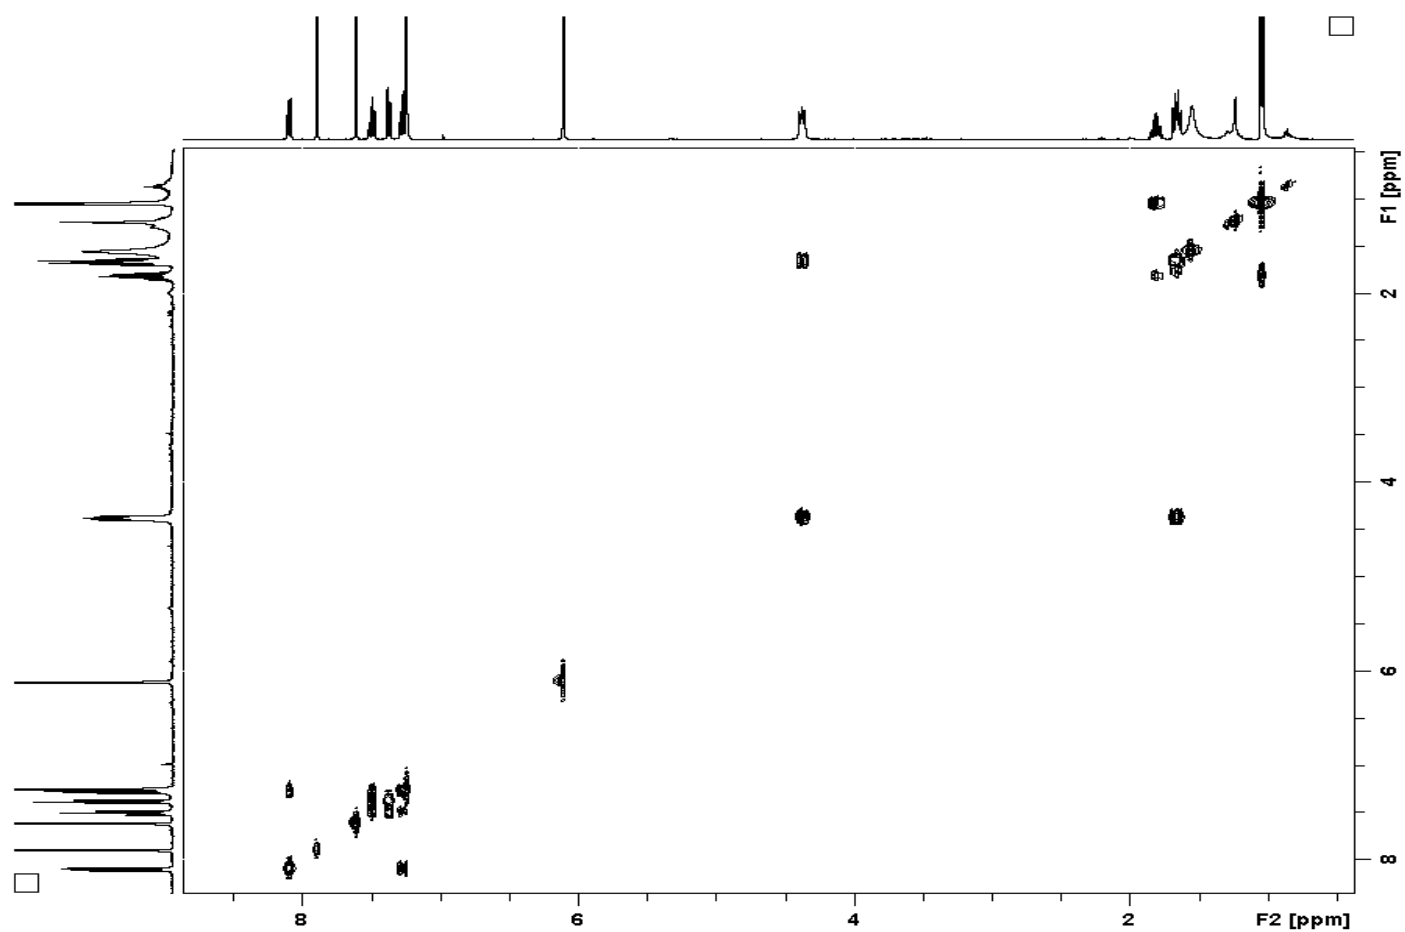

**Figure S54.** Crystal packing of compound **1**

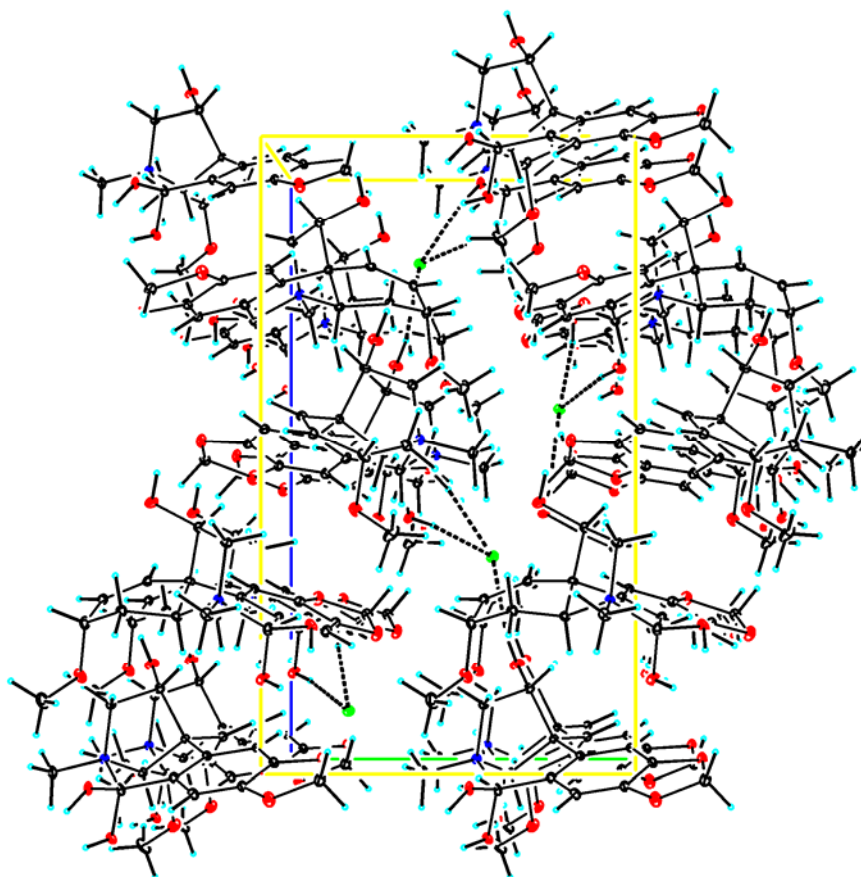

**Figure S55.** Crystal packing of compound **3** at 100 (2) K

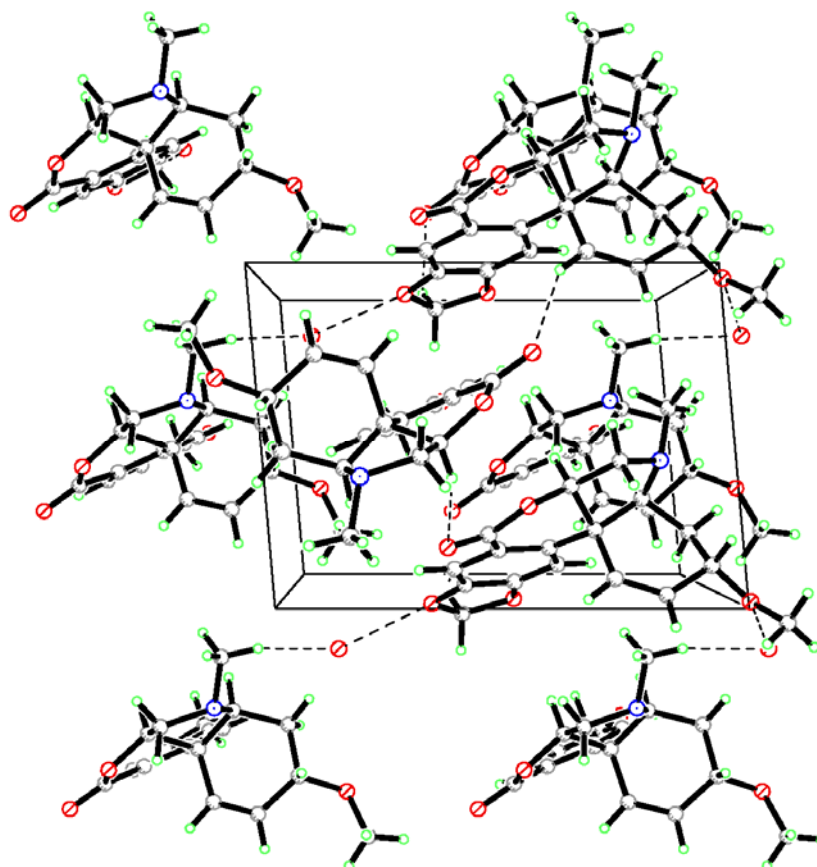

**Table S1. Cytotoxicity of Compounds 1–15 (IC<sub>50</sub> in  $\mu$ M) Against Five Cancer Cell Lines and One Non-Cancerous Human Beas-2B Cell Line<sup>a</sup>**

| Compounds                           | HL-60  | K562   | A-549  | HepG2  | HT-29  | Beas-2B | Highest index of selectivity |
|-------------------------------------|--------|--------|--------|--------|--------|---------|------------------------------|
| <b>1</b>                            | 0.91   | 1.0    | 1.1    | 1.5    | 1.2    | 3.7     | <b>4.1</b>                   |
| <b>2</b>                            | 1.4    | 2.5    | 2.5    | 4.8    | 2.1    | 5.0     | <b>3.6</b>                   |
| <b>3</b>                            | >40    | >40    | >40    | >40    | >40    | N/A     |                              |
| <b>4</b>                            | >40    | >40    | >40    | >40    | >40    | N/A     |                              |
| <b>5</b>                            | >40    | >40    | >40    | >40    | >40    | N/A     |                              |
| <b>6</b>                            | >40    | >40    | >40    | >40    | >40    | N/A     |                              |
| <b>7</b>                            | 20     | 10     | 39     | 14     | 28     | >40     | <b>&gt;3.8</b>               |
| <b>8</b>                            | 11     | 5.8    | 26     | 21     | 21     | 36      | <b>6.2</b>                   |
| <b>9</b>                            | 0.81   | 0.70   | 13     | 1.4    | 2.3    | 7.3     | <b>10</b>                    |
| <b>10</b>                           | >40    | >40    | >40    | >40    | >40    | N/A     |                              |
| <b>11</b>                           | >40    | >40    | >40    | >40    | >40    | N/A     |                              |
| <b>12</b>                           | >40    | >40    | >40    | >40    | >40    | N/A     |                              |
| <b>13</b>                           | >40    | >40    | >40    | >40    | >40    | N/A     |                              |
| <b>14</b>                           | 1.6    | 2.3    | 1.9    | 3.7    | 3.2    | 4.9     | <b>3.1</b>                   |
| <b>15</b>                           | >40    | >40    | >40    | >40    | >40    | N/A     |                              |
| Positive control DDP                | 1.2    | 17     | 13     | 3.2    | 19     | 11      | <b>9.2</b>                   |
| Positive control Taxol <sup>®</sup> | <0.008 | <0.008 | <0.008 | <0.008 | <0.008 | 0.88    | <b>110</b>                   |

<sup>a</sup> N/A: not available. The “Highest index of selectivity” is the ratio of the IC<sub>50</sub> value for the Beas-2B cell line over the lowest cancer cell IC<sub>50</sub> value.
